# Supplementary material for: Visible Light‐Promoted Beckmann Rearrangements: Separating Sequential Photochemical and Thermal Phenomena in a Continuous Flow Reactor
Source: PubMed Central journal article supplement — European J Org Chem. 2019 Mar 8;2019(11):2163–71. doi: 10.1002/ejoc.201900231 (PMC6686973; doi:10.1002/ejoc.201900231), 2019-03-08

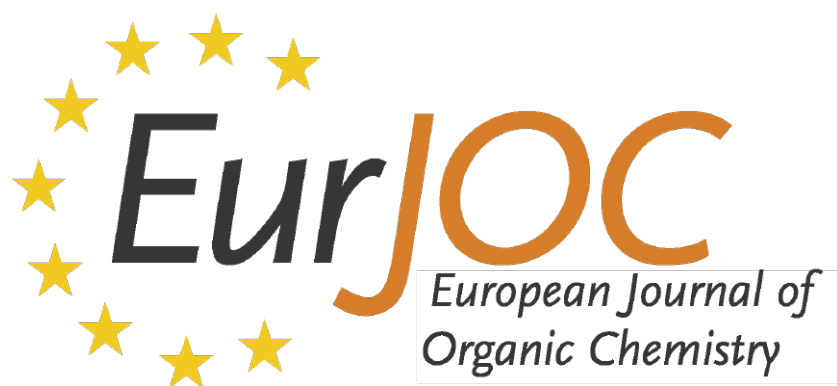

## Supporting Information

### **Visible Light-Promoted Beckmann Rearrangements: Separating Sequential Photochemical and Thermal Phenomena in a Continuous Flow Reactor**

Yuesu Chen, David Cantillo, and C. Oliver Kappe\*

[ejoc201900231-sup-0001-SupMat.pdf](#)

## 1. Details of the Flow Set-up

A Vapoutec® E-Series system was used as the flow set-up for the visible light-promoted Beckmann rearrangement (as shown in Figure S1). The UV-150™ flow photoreactor ( $R_1$ ), the heated coil reactor ( $R_2$ ), pumps ( $P_1$  and  $P_2$ ), two-way valves ( $Val_1$  and  $Val_2$ ) and the back pressure regulator ( $BPR$ ) are parts of the Vapoutec® system. PFA tubings (i.d. 0.8 mm, o.d. 1.6 mm) were used for the construction of the injection coils ( $L_1$  and  $L_2$ ) and for the connection of all parts downstream from the pumps. PFA tubings (i.d. 1.58 mm, o.d. 3.18 mm) were used for solvent and inlet of the pumps.

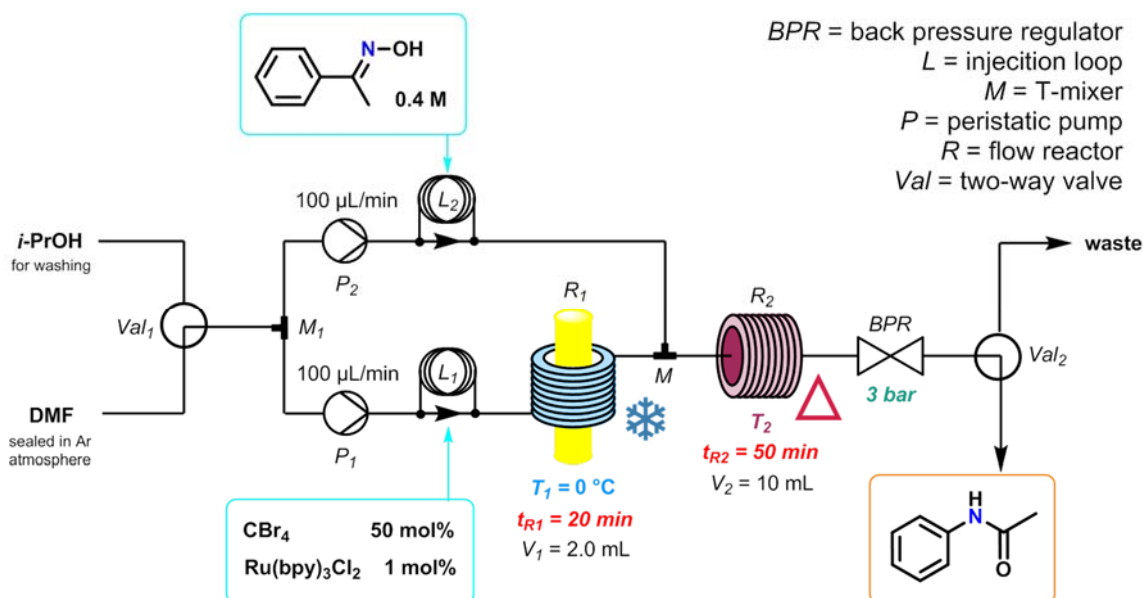

Figure S1: Complete lay-out of the flow set-up.

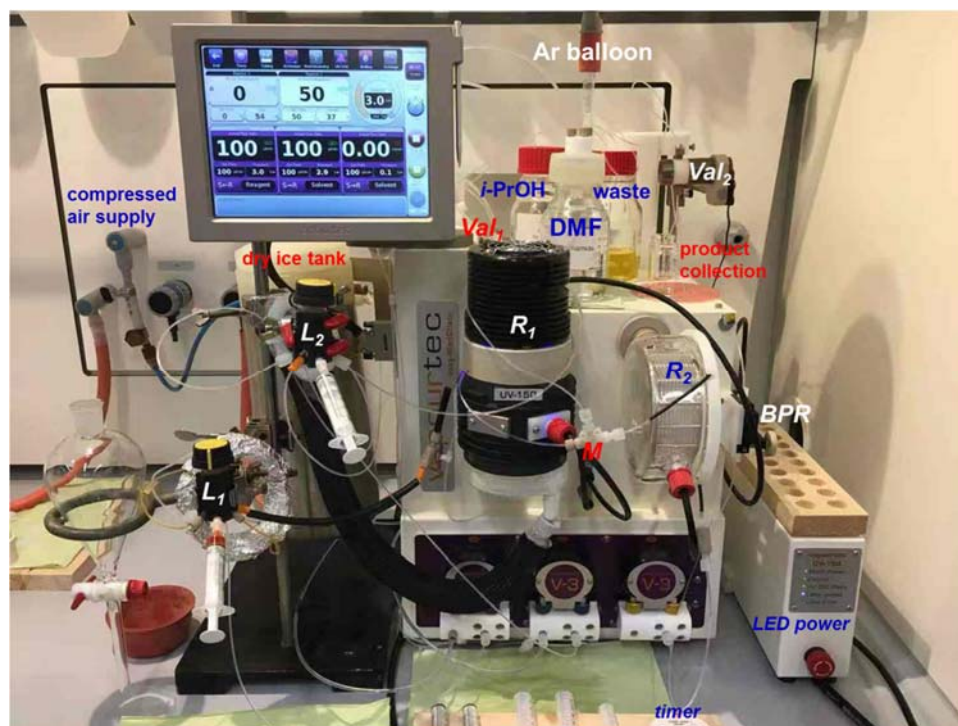

Figure S2: Photograph of the flow set-up (Vapoutec® E-Series system).

The entire flow system was purged with degassed DMF (Ar sparging for 30 min, sealed in Ar atmosphere) before tightening the  $BPR$ . After using the flow system, the  $BPR$  was loosened before washing with isopropanol (*i*-PrOH).

## 2. Construction of Chip Reactor

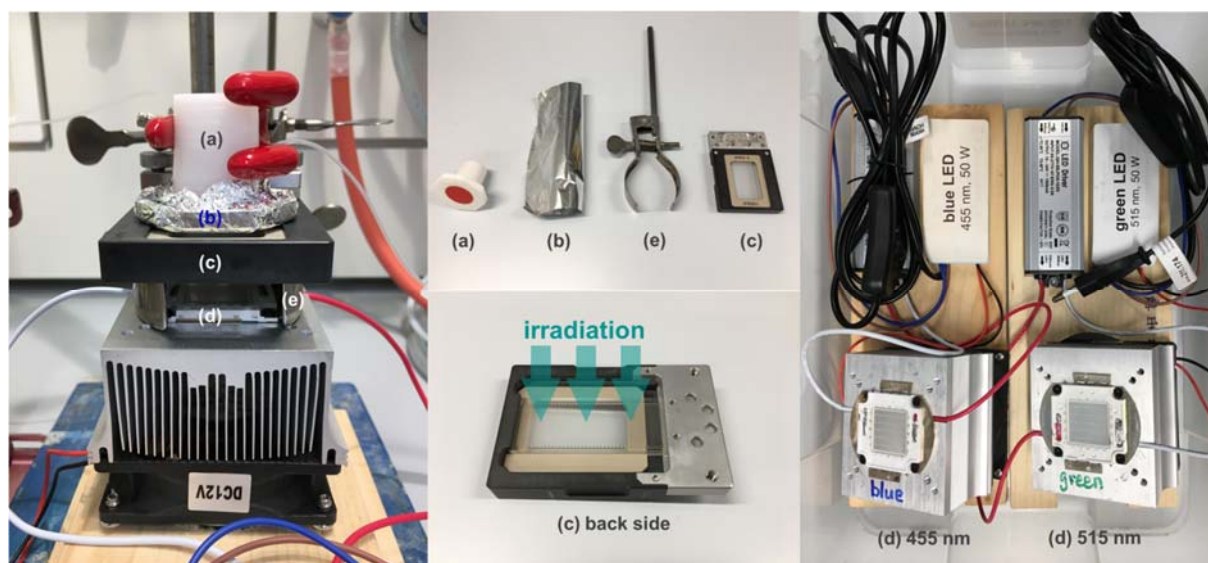

**Figure S3:** Photograph of all parts for the construction of reactor A and B: (a) plastic stopper; (b) aluminum foil; (c) Syrris @1000  $\mu\text{L}$  glass chip; (d) 50 W LED with cooler; (e) iron clamp used as spacer between glass chip and LED.

## 3. General Analytical Methods

NMR spectra were recorded on a 300 MHz instrument (75 MHz for  $^{13}\text{C}$ ). Chemical shifts ( $\delta$ ) are expressed in ppm downfield from TMS as internal standard. The letters s, d, t, q and m stand for singlet, doublet, triplet, quadruplet and multiplet.

HPLC analysis was carried out on a C18 reversed-phase (RP) analytical column (150  $\times$  4.6 mm, particle size 5  $\mu\text{m}$ ) at 37  $^{\circ}\text{C}$  using a mobile phase A (water/MeCN 90:10 (v/v) + 0.1% TFA) and B (MeCN + 0.1% TFA) at a flow rate of 1.5 mL/min. The following gradient was applied: linear increase from solution 30% B to 100% B within 10 min.

GC-MS spectra were recorded using a ThermoFisher Focus GC coupled with a DSQ II (EI, 70 eV). A TR-5MS column (30 m  $\times$  0.25 mm  $\times$  0.25  $\mu\text{m}$ ) was used, with helium as carrier gas (1 mL $\cdot$ min $^{-1}$  constant flow). The injector temperature was set to 280  $^{\circ}\text{C}$ . After 1 min at 50  $^{\circ}\text{C}$ , the temperature was increased by 25  $^{\circ}\text{C}\cdot$ min $^{-1}$  to 300  $^{\circ}\text{C}$  and kept at 300  $^{\circ}\text{C}$  for 3 min.

Emission spectra of the light sources were measured with Avantes® Startline™ AvaSpec-2048 spectrometer.

Carbon monoxide was detected using Chauvin Arnoux® C.A 895 carbon monoxide detector.

Melting points were determined on a Stuart™ SMP3 melting point apparatus.

## 4. Emission Spectra of the Light Sources

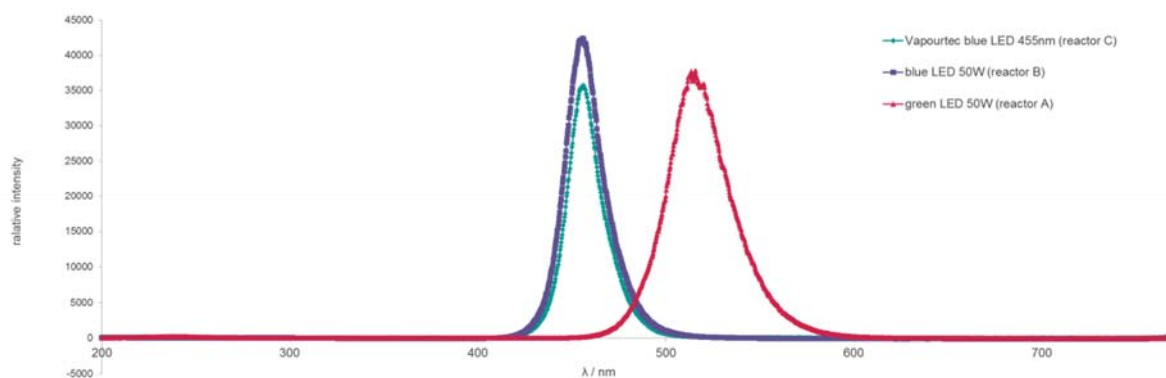

**Figure S4:** Emission spectra of the light sources.

## 5. Numeric Data of Figure 2

**Table S1:** Optimization of reaction temperature (numeric data of Figure 2).

| Entry | $T / ^\circ\text{C}$ | 1a / % | 2a / % | $\text{CBr}_4 / \%$ |
|-------|----------------------|--------|--------|---------------------|
| 1     | 0                    | 81     | 0      | 0                   |
| 2     | 10                   | 81     | 0      | 0                   |
| 3     | 20                   | 49     | 24     | 0                   |
| 4     | 30                   | 22     | 58     | 2                   |
| 5     | 40                   | 6      | 79     | 3                   |
| 6     | 50                   | 5      | 77     | 8                   |
| 7     | 60                   | 5      | 76     | 7                   |
| 8     | 70                   | 7      | 73     | 3                   |

## 6. Quenching Experiment without Substrate

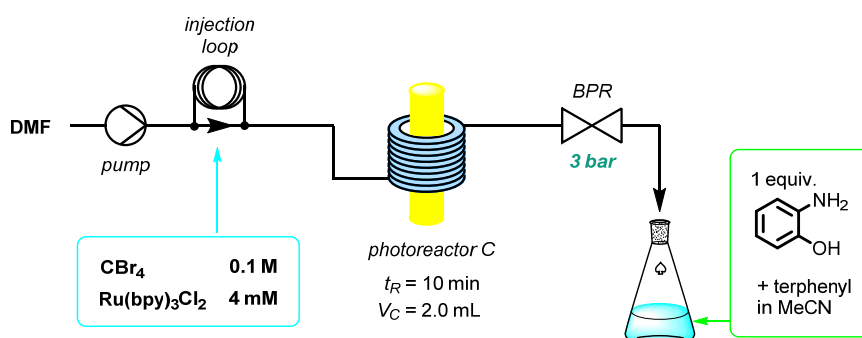

**Figure S5:** Flow set-up for the quenching experiment.

The flow set-up shown in Figure 1 was used for this experiment (Figure S5). After the stabilization of the temperature and pressure, 500  $\mu\text{L}$  degassed solution was injected for each run. The discharge was collected with a 5 mL volumetric flask with 0.01 mmol *p*-terphenyl and 2-aminophenol (**16**), then diluted to 5.000 mL with acetonitrile for HPLC and GC-MS analysis.

**Table S2:** Results of the quenching experiment.<sup>[a]</sup>

| Entry | $T / ^\circ\text{C}$ | Remained $\text{CBr}_4 / \%$ <sup>[b]</sup> |
|-------|----------------------|---------------------------------------------|
| 1     | 0                    | 0                                           |
| 2     | 10                   | 1                                           |
| 3     | 20                   | 2                                           |
| 4     | 30                   | 5                                           |
| 5     | 40                   | 10                                          |

[a] The solution of reactants was degassed by Ar sparging for 15 min; 0.5 mL was injected for each run. [b] Determined by HPLC at 254 nm using *p*-terphenyl as internal standard.

The results (Table S2) showed that the conversion of  $\text{CBr}_4$  favors low temperature, which is in accordance with Figure 2. A large increase of the triplet life time of  $\text{Ru(II)}^*$  at low temperature (*J. Phys. Chem. A* **2004**, *108*, 9938) makes the quenching more effective. Benzoxazole (**17**) was detected from the samples of all entries; whereas no trace of benzoxazolidinone (**18**) was detected, indicating that bromophosgene (**15**) was not able to survive more than 10 min under the reaction condition.

## 7. Optimization of Reaction Time and Catalyst Loading

**Table S3.** Optimization of reaction time and catalyst loading.<sup>[a]</sup>

| Entry | Time [min] | Catalyst [mol%] | Molar fraction [%] <sup>[b]</sup> |    |                                 |
|-------|------------|-----------------|-----------------------------------|----|---------------------------------|
|       |            |                 | 1a                                | 2a | CBr <sub>4</sub> <sup>[c]</sup> |
| 1     | 5          | 2.0             | 21                                | 58 | 13                              |
| 2     | 7.5        | 2.0             | 16                                | 64 | 10                              |
| 3     | 10         | 2.0             | 6                                 | 79 | 3                               |
| 4     | 15         | 2.0             | 5                                 | 75 | 0                               |
| 5     | 20         | 2.0             | 5                                 | 70 | 0                               |
| 6     | 10         | 1.0             | 13                                | 71 | 13                              |
| 7     | 20         | 1.0             | 3                                 | 77 | 5                               |

[a] The solution of reactants was degassed by Ar sparging for 15 min; 0.5 mL was injected for each run. [b] Determined by HPLC at 254 nm using *p*-terphenyl as internal standard. [c] Unconverted CBr<sub>4</sub> in the reaction mixture.

The influence of reaction time and catalyst loading was investigated at 40 °C (Table S3). The conversion of **1a** stopped increasing when all CBr<sub>4</sub> was consumed (Table S3, entry 3-5), indicating a non-self-propagative mechanism. The reaction rate dropped when the catalyst loading was reduced to 1 mol% (Table S3, entry 6), but prolonging the reaction time to 20 min (Table S3, entry 7) is enough to compensate this conversion loss (Table S3, entry 3).

## 8. Attempt to Scavenge Bromophosgene

The reaction of Table 3 entry 1 was performed using 2-aminophenol (**16**) in place of oxime (**1a**) (Figure S6), in order to scavenge any trace of bromophosgene (**15**) in the reaction mixture.

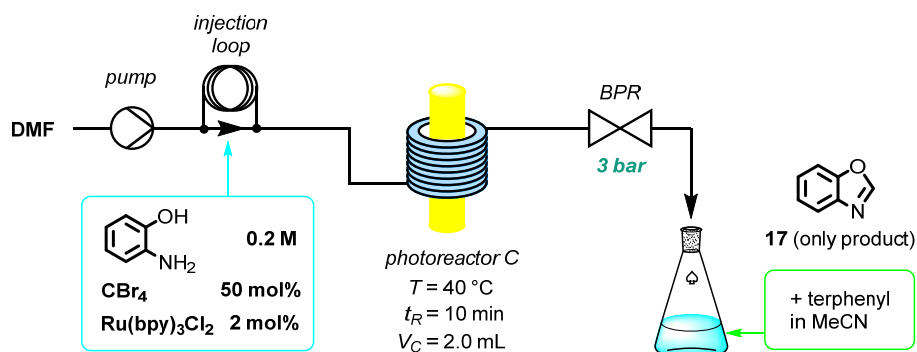

**Figure S6:** Flow setup for bromophosgene scavenging.

However, benzoxazolidinone (**18**), the condensation product with **15** (a carbonylating reagent), was not detected; this fact ruled out the possibility of OH-activation by **15** during the Beckmann rearrangement. The formation of benzoxazole (**17**) confirmed the presence of V-H reagent (**5A**, a formylating reagent) in the reaction mixture.

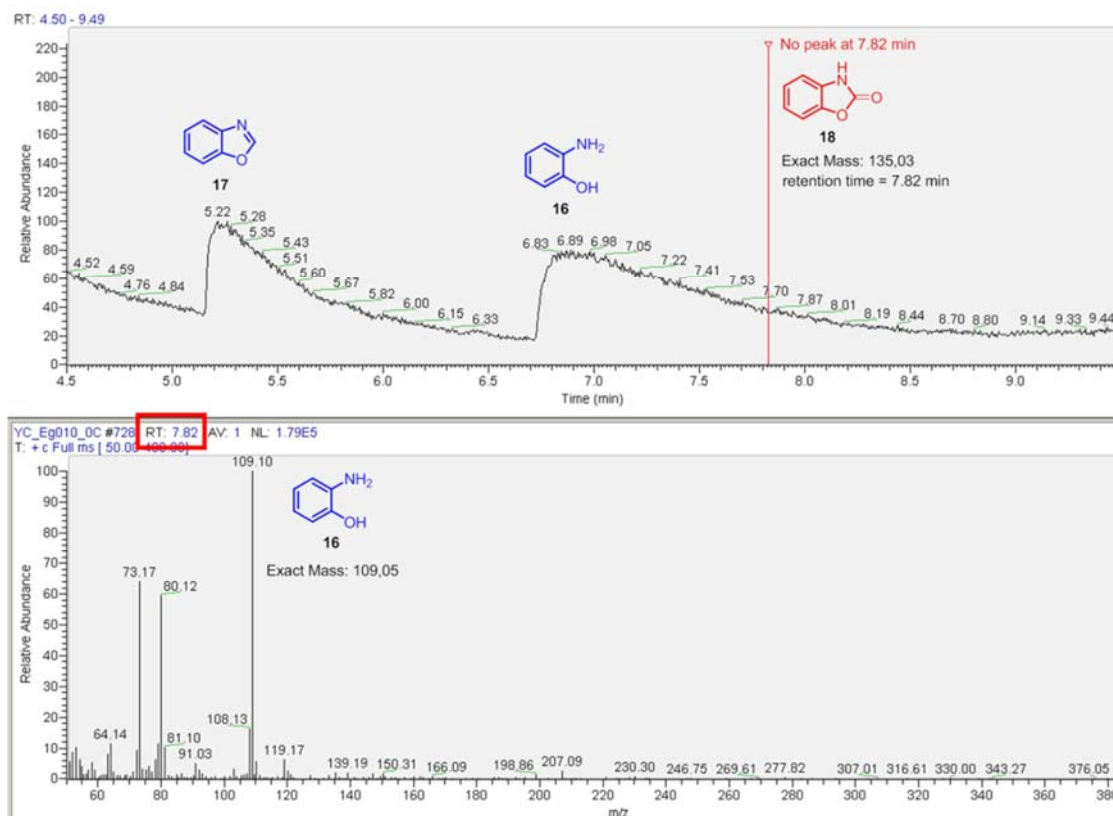

Figure S7: No peak corresponding benzoxazolone (18) was given by GC-MS analysis.

## 9. HPLC Examples

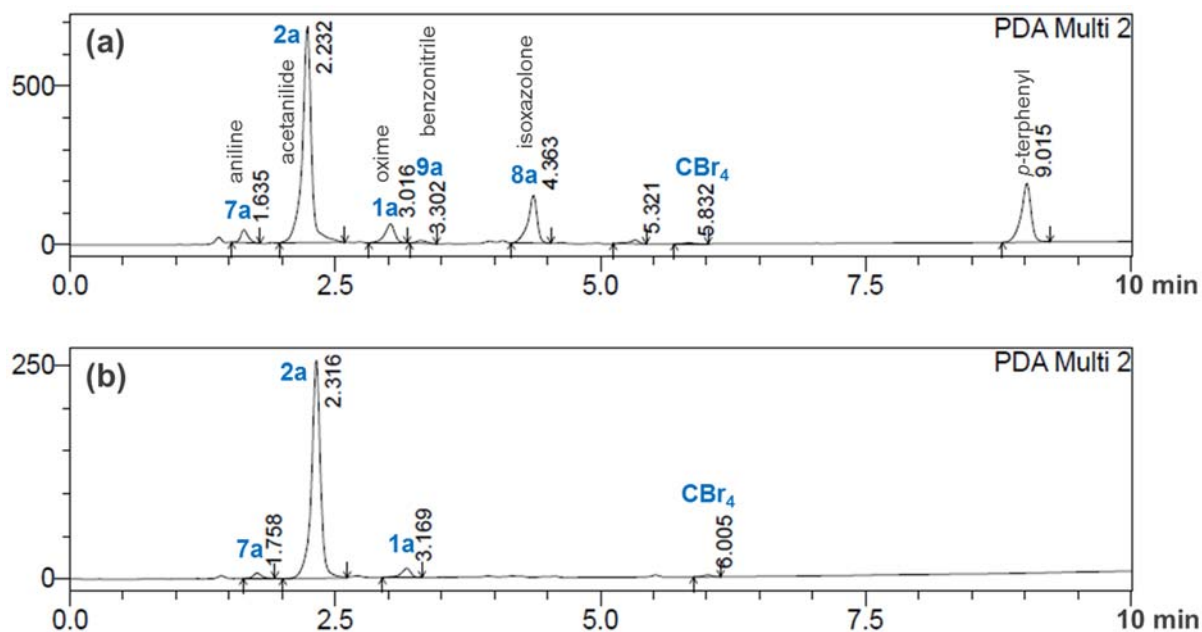

Figure S8: HPLC graphics of the best results from (a) one-pot flow reaction (Table 1, entry 5) and (b) two-step flow reaction (Table 4, entry 1).

## 10. Substrate Synthesis and Characterization

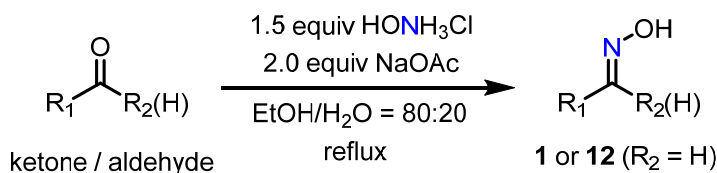

*General Method I (for the Synthesis of Ketoximes) (1):* 3282 mg (40 mmol) anhydrous NaOAc and 2084 mg (30 mmol) HONH<sub>3</sub>Cl were dissolved in 50 mL aqueous ethanol (EtOH/H<sub>2</sub>O = 80:20) in a 250 mL round bottomed flask; the mixture was stirred under room temperature. When all solid was dissolved, ketone (20 mmol) was added. The flask was then fitted with a reflux condenser and heated to reflux until the complete conversion of the ketone (monitored by HPLC). The cooled reaction mixture was concentrated *in vacuo*, dissolved in 100 mL Et<sub>2</sub>O and washed with 3 × 50 mL distilled water in a separatory funnel. The Et<sub>2</sub>O layer was dried over anhydrous Na<sub>2</sub>SO<sub>4</sub>, concentrated *in vacuo* and dried *in vacuo* overnight to afford the product.

*General Method II (for the Synthesis of Aldoximes) (12):* 3282 mg (40 mmol) anhydrous NaOAc and 2084 mg (30 mmol) HONH<sub>3</sub>Cl were dissolved in 50 mL aqueous ethanol (EtOH/H<sub>2</sub>O = 80:20) in a 250 mL round bottomed flask; the mixture was stirred under room temperature. When all solid was dissolved, aldehyde (20 mmol) was added. The flask was then fitted with a reflux condenser and heated to reflux until the complete conversion of the aldehyde (monitored by HPLC). The cooled reaction mixture was concentrated *in vacuo*, dissolved in 100 mL Et<sub>2</sub>O and washed with 3 × 50 mL distilled water in a separatory funnel. The Et<sub>2</sub>O layer was dried over anhydrous Na<sub>2</sub>SO<sub>4</sub>, concentrated *in vacuo* to afford the crude product. The crude product was purified by flash chromatography on silica (40 – 63 μm) using petroleum ether (PE, 40 – 60 °C) and a 1:1 mixture of dichloromethane and ethyl acetate (DCM/EA) as eluent (gradient: 0 – 40% DCM/EA over 15 CV) to afford the product.

*Acetophenone Oxime (1a):* the product was further purified by flash chromatography on silica (40 – 63 μm) using petroleum ether (PE, 40 – 60 °C) and ethyl acetate (EA) as eluent (gradient: 0 – 15% EA over 3 CV, then maintained at 15% EA over 10 CV), 3282 mg (92%) colorless crystals (mp 59 – 60 °C, lit.<sup>1</sup> 59 – 60 °C) was obtained: <sup>1</sup>H NMR (300 MHz, DMSO) δ 11.18 (s, 1H), 7.69 – 7.60 (m, 2H), 7.44 – 7.31 (m, 3H), 2.15 (s, 3H); <sup>13</sup>C NMR (75 MHz, DMSO) δ 153.32, 137.43, 129.03, 128.79, 125.98, 11.99.

*Benzophenone Oxime (1b):* white crystals, mp 143 – 144 °C (lit.<sup>2</sup> 143 – 144 °C); <sup>1</sup>H NMR (300 MHz, DMSO) δ 11.33 (s, 1H), 7.58 – 7.17 (m, 10H); <sup>13</sup>C NMR (75 MHz, DMSO) δ 155.61, 137.21, 133.98, 129.32, 129.27, 128.82, 128.78, 128.58, 127.41.

*4-Methoxyacetophenone Oxime (1c):* white crystals, mp 86 – 87 °C (lit.<sup>1</sup> 85 – 87 °C); <sup>1</sup>H NMR (300 MHz, DMSO) δ 10.99 (s, 1H), 7.69 – 7.48 (m, 2H), 7.03 – 6.82 (m, 2H), 3.76 (s, 3H), 2.12 (s, 3H); <sup>13</sup>C NMR (75 MHz, DMSO) δ 160.07, 152.82, 129.89, 127.28, 114.15, 55.56, 11.90.

*3-Methoxyacetophenone Oxime (1d):* light yellow oily liquid; <sup>1</sup>H NMR (300 MHz, DMSO) δ 11.25 (s, 1H), 7.38 – 7.16 (m, 3H), 6.92 (ddd, *J* = 8.0, 2.5, 1.1 Hz, 1H), 3.75 (d, *J* = 4.4 Hz, 3H), 2.16 (s, 3H); <sup>13</sup>C NMR (75 MHz, DMSO) δ 159.63, 153.21, 138.87, 129.81, 118.49, 114.65, 111.20, 55.36, 11.99.

*2-Methoxyacetophenone Oxime (1e):* white solid, mp 85 – 87 °C; major isomer: <sup>1</sup>H NMR (300 MHz, DMSO) δ 10.99 (s, 1H), 7.41 – 7.28 (m, 1H), 7.21 (dd, *J* = 7.5, 1.7 Hz, 1H), 7.03 (d, *J* = 8.0 Hz, 1H), 6.93 (td, *J* = 7.4, 0.9 Hz, 1H), 3.78 (s, 3H), 2.06 (s, 3H); <sup>13</sup>C NMR (75 MHz, DMSO) δ 157.53, 154.59, 130.25, 129.57, 127.84, 120.65, 111.91, 55.83, 15.74. Apparent signals of the minor isomer: <sup>1</sup>H NMR (300 MHz, DMSO) δ 10.30 (s, 1H), 3.74 (s, 3H), 2.01 (s, 3H); <sup>13</sup>C NMR (75 MHz, DMSO) δ 155.78, 151.66, 129.66, 128.87, 125.64, 120.50, 111.78, 21.46; major:minor = 89:11.

*4-Methylacetophenone Oxime (1f):* white crystals, mp 85 – 86 °C (lit.<sup>1</sup> 84 – 86 °C); <sup>1</sup>H NMR (300 MHz, DMSO) δ 11.09 (s, 1H), 7.54 (d, *J* = 8.2 Hz, 2H), 7.18 (d, *J* = 8.0 Hz, 2H), 2.30 (s, 3H), 2.12 (s, 3H); <sup>13</sup>C NMR (75 MHz, DMSO) δ 153.16, 138.44, 134.64, 129.36, 125.87, 21.23, 11.95.

<sup>1</sup> S. Prateeptongkum, I. Jovel, R. Jackstell, N. Vogl, C. Weckbecker, M. Beller, *Chem. Commun.* **2009**, 0, 1990-1992.

<sup>2</sup> E. B. Ayres, C. R. Hauser, *J. Org. Chem.* **1948**, *13*, 116-119.

**3-Methylacetophenone Oxime (1g)**: colorless crystals, mp 60 – 61 °C (lit.<sup>3</sup> 57 °C); <sup>1</sup>H NMR (300 MHz, DMSO) δ 11.14 (s, 1H), 7.44 (d, *J* = 9.6 Hz, 2H), 7.26 (t, *J* = 7.5 Hz, 1H), 7.17 (d, *J* = 7.5 Hz, 1H), 2.32 (s, 3H), 2.14 (s, 3H); <sup>13</sup>C NMR (75 MHz, DMSO) δ 153.36, 137.85, 137.40, 129.66, 128.67, 126.57, 123.17, 21.52, 12.03.

**2-Methylacetophenone Oxime (1h)**: light yellow oily liquid; major isomer: <sup>1</sup>H NMR (300 MHz, DMSO) δ 11.05 (s, 1H), 7.33 – 7.11 (m, 5H), 2.29 (s, 3H), 2.09 (s, 3H); <sup>13</sup>C NMR (75 MHz, DMSO) δ 155.37, 138.53, 135.63, 130.83, 128.58, 128.37, 126.08, 20.40, 15.95. Apparent signals of the minor isomer: <sup>1</sup>H NMR (300 MHz, DMSO) δ 10.42 (s, 1H), 2.17 (s, 3H), 2.04 (s, 3H); <sup>13</sup>C NMR (75 MHz, DMSO) δ 153.84, 137.36, 134.70, 129.89, 128.11, 126.49, 125.92, 22.01, 19.59; major:minor = 76:24.

**4-Bromoacetophenone Oxime (1i)**: white crystals, mp 128 – 129 °C (lit.<sup>1</sup> 128 – 130 °C); <sup>1</sup>H NMR (300 MHz, DMSO) δ 11.33 (s, 1H), 7.67 – 7.49 (m, 4H), 2.14 (s, 3H); <sup>13</sup>C NMR (75 MHz, DMSO) δ 152.54, 136.59, 131.73, 128.00, 122.38, 11.79.

**4-Chloroacetophenone Oxime (1j)**: white crystals, mp 99 – 100 °C (lit.<sup>1</sup> 97 – 99 °C); <sup>1</sup>H NMR (300 MHz, DMSO) δ 11.33 (s, 1H), 7.66 (d, *J* = 8.6 Hz, 2H), 7.43 (d, *J* = 8.6 Hz, 2H), 2.14 (s, 3H); <sup>13</sup>C NMR (75 MHz, DMSO) δ 152.44, 136.22, 133.71, 128.80, 127.70, 11.82.

**3-Chloroacetophenone Oxime (1k)**: white crystals, mp 88 – 89 °C (lit.<sup>1</sup> 88 – 90 °C); <sup>1</sup>H NMR (300 MHz, DMSO) δ 11.40 (s, 1H), 7.73 – 7.53 (m, 2H), 7.41 (dd, *J* = 3.7, 1.6 Hz, 2H), 2.15 (s, 3H); <sup>13</sup>C NMR (75 MHz, DMSO) δ 152.37, 139.53, 133.69, 130.68, 128.82, 125.62, 124.65, 11.87.

**2-Chloroacetophenone Oxime (1l)**: white solid powder, mp 87 – 88 °C (lit.<sup>4</sup> 87 – 90 °C, lit.<sup>1</sup> 102 – 104 °C); major isomer: <sup>1</sup>H NMR (300 MHz, DMSO) δ 11.29 (s, 1H), 7.54 – 7.30 (m, 4H), 2.10 (s, 1H); <sup>13</sup>C NMR (75 MHz, DMSO) δ 154.11, 137.73, 131.92, 130.85, 130.45, 130.10, 127.65, 16.01. Apparent signals of the minor isomer: <sup>1</sup>H NMR (300 MHz, DMSO) δ 10.59 (s, 1H), 2.06 (s, 3H); <sup>13</sup>C NMR (75 MHz, DMSO) δ 151.34, 136.36, 130.00, 129.49, 129.12, 127.54, 21.18; major:minor = 81:19.

**4-Methylbenzaldehyde Oxime (12a)**: colorless oil; <sup>1</sup>H NMR (300 MHz, DMSO) δ 10.96 (s, 1H), 8.06 (s, 1H), 7.52 (d, *J* = 8.8 Hz, 2H), 6.96 (d, *J* = 8.8 Hz, 2H), 3.78 (s, 3H); <sup>13</sup>C NMR (75 MHz, DMSO) δ 160.53, 148.07, 128.27, 126.06, 114.63, 55.65.

**Benzaldehyde Oxime (12b)**: white crystals, mp 68 – 69 °C (lit.<sup>5</sup> 63 – 65 °C); <sup>1</sup>H NMR (300 MHz, DMSO) δ 11.24 (s, 1H), 8.14 (s, 1H), 7.70 – 7.54 (m, 2H), 7.49 – 7.30 (m, 3H); <sup>13</sup>C NMR (75 MHz, DMSO) δ 148.54, 133.52, 129.70, 129.16, 126.84.

**4-Chlorobenzaldehyde Oxime (12c)**: white crystals, mp 112 – 113 °C (lit.<sup>6</sup> 109 – 112 °C); <sup>1</sup>H NMR (300 MHz, DMSO) δ 11.37 (s, 1H), 8.15 (s, 1H), 7.61 (d, *J* = 8.5 Hz, 2H), 7.46 (d, *J* = 8.5 Hz, 2H); <sup>13</sup>C NMR (75 MHz, DMSO) δ 147.56, 134.15, 132.46, 129.24, 128.48.

## 11. Characterization of Isolated Products

**Acetanilide (2a)**: 123.9 mg (76%); white crystals, mp 114 – 115 °C (lit.<sup>7</sup> 115 – 116 °C); <sup>1</sup>H NMR (300 MHz, DMSO) δ 9.90 (s, 1H), 7.57 (d, *J* = 7.6 Hz, 2H), 7.28 (t, *J* = 7.9 Hz, 2H), 7.02 (t, *J* = 7.4 Hz, 1H), 2.04 (s, 3H); <sup>13</sup>C NMR (75 MHz, DMSO) δ 168.69, 139.78, 129.08, 123.39, 119.42, 24.44.

**Benzanilide (2b)**: 181.1 mg (77%); white crystals, mp 163 – 164 °C (lit.<sup>7</sup> 162 – 164 °C); <sup>1</sup>H NMR (300 MHz, DMSO) δ 10.25 (s, 1H), 8.02 – 7.90 (m, 2H), 7.79 (dd, *J* = 8.5, 1.0 Hz, 2H), 7.65 – 7.46 (m, 3H), 7.36 (dd, *J* = 10.7, 5.1 Hz, 2H), 7.16 – 7.04 (m, 1H); <sup>13</sup>C NMR (75 MHz, DMSO) δ 166.00, 139.62, 135.44, 131.99, 129.05, 128.83, 128.10, 124.10, 120.81.

**4-Methoxyacetanilide (2c)**: 118.6 mg (65%); white crystals, mp 131 – 132 °C (lit.<sup>7</sup> 128 – 130 °C); <sup>1</sup>H NMR (300 MHz, DMSO) δ 9.76 (s, 1H), 7.55 – 7.41 (m, 2H), 6.93 – 6.78 (m, 2H), 3.71 (s, 3H), 2.01 (s, 3H); <sup>13</sup>C NMR (75 MHz, DMSO) δ 168.15, 155.46, 132.98, 120.98, 114.21, 55.56, 24.23.

<sup>3</sup> T. Posner, G. Schreiber, *Ber. Dtsch. Chem. Ges.* **1924**, *57*, 1127-1137.

<sup>4</sup> T. Weil, H. Stange, Patent: ZA 6800916 (9. Jul. 1968).

<sup>5</sup> J. H. P. Tyman, P. B. Payne, *J. Chem. Res.* **2006**, 691-695.

<sup>6</sup> J. Picha, R. Cibulka, F. Hampf, F. Liska, P. Parik, O. Pytela, *Collect. Czech. Chem. Commun.* **2004**, *69*, 397-413.

<sup>7</sup> V. P. Srivastava, A. K. Yadav, L. D. S. Yadav, *Synlett* **2014**, *25*, 665-670.



**3-Methoxyacetanilide (2d)**: 137.8 mg (70%); offwhite crystals, mp 102 – 103 °C (lit.<sup>8</sup> 103 – 103.5 °C, lit.<sup>7</sup> 87 – 89 °C); <sup>1</sup>H NMR (300 MHz, DMSO) δ 9.89 (s, 1H), 7.28 (t, *J* = 2.1 Hz, 1H), 7.13 (ddd, *J* = 11.5, 8.5, 4.8 Hz, 2H), 6.60 (ddd, *J* = 8.1, 2.5, 1.1 Hz, 1H), 3.71 (s, 3H), 2.03 (s, 3H); <sup>13</sup>C NMR (75 MHz, DMSO) δ 168.75, 159.92, 140.94, 129.87, 111.73, 108.76, 105.31, 55.37, 24.51.

**2-Methoxyacetanilide (2e)**: 123.8 mg (62%); light yellow crystals, mp 87 – 88 °C (lit.<sup>9</sup> 87 – 88 °C); <sup>1</sup>H NMR (300 MHz, DMSO) δ 9.10 (s, 1H), 7.94 (d, *J* = 7.8 Hz, 1H), 7.13 – 6.97 (m, 2H), 6.95 – 6.80 (m, 1H), 3.82 (s, 3H), 2.09 (s, 3H); <sup>13</sup>C NMR (75 MHz, DMSO) δ 168.86, 149.96, 127.88, 124.60, 122.43, 120.59, 111.49, 56.01, 24.29.

**4-Methylacetanilide (2f)**: 133.7 mg (75%); white crystals, mp 152 – 153 °C (lit.<sup>7</sup> 149 – 150 °C); <sup>1</sup>H NMR (300 MHz, DMSO) δ 9.82 (s, 1H), 7.45 (d, *J* = 8.4 Hz, 2H), 7.08 (d, *J* = 8.2 Hz, 2H), 2.24 (s, 3H), 2.01 (s, 3H); <sup>13</sup>C NMR (75 MHz, DMSO) δ 168.43, 137.28, 132.23, 129.46, 119.42, 24.39, 20.87.

**3-Methylacetanilide (2g)**: 136.0 mg (76%); offwhite crystals, mp 66 – 67 °C (lit.<sup>10</sup> 65 – 66 °C); <sup>1</sup>H NMR (300 MHz, DMSO) δ 9.83 (s, 1H), 7.49 – 7.28 (m, 2H), 7.16 (t, *J* = 7.8 Hz, 1H), 6.84 (d, *J* = 7.5 Hz, 1H), 2.26 (s, 3H), 2.03 (s, 3H); <sup>13</sup>C NMR (75 MHz, DMSO) δ 168.62, 139.71, 138.21, 128.92, 124.10, 119.94, 116.63, 24.46, 21.65.

**2-Methylacetanilide (2h)**: 94.5 mg (54%); grey crystals, mp 107 – 109 °C (lit.<sup>11</sup> 107 – 110 °C, lit.<sup>10</sup> 110 – 112 °C); <sup>1</sup>H NMR (300 MHz, DMSO) δ 9.27 (s, 1H), 7.40 (d, *J* = 7.7 Hz, 1H), 7.29 – 6.98 (m, 3H), 2.20 (s, 3H), 2.06 (s, 3H); <sup>13</sup>C NMR (75 MHz, DMSO) δ 168.58, 136.96, 131.97, 130.66, 126.29, 125.43, 125.40, 23.73, 18.32.

**4-Bromoacetanilide (2i)**: 146.6 mg (57%); white crystals, mp 169 – 170 °C (lit.<sup>7</sup> 165 – 166 °C); <sup>1</sup>H NMR (300 MHz, DMSO) δ 10.07 (s, 1H), 7.64 – 7.52 (m, 2H), 7.51 – 7.39 (m, 2H), 2.04 (s, 3H); <sup>13</sup>C NMR (75 MHz, DMSO) δ 168.91, 139.12, 131.91, 121.28, 114.92, 24.48.

**4-Chloroacetanilide (2j)**: 91.4 mg (45%); white crystals, mp 177 – 178 °C (lit.<sup>12</sup> 177 – 178 °C); <sup>1</sup>H NMR (300 MHz, DMSO) δ 10.06 (s, 1H), 7.70 – 7.50 (m, 2H), 7.42 – 7.25 (m, 2H), 2.04 (s, 3H); <sup>13</sup>C NMR (75 MHz, DMSO) δ 168.87, 138.71, 129.00, 126.92, 120.90, 24.44.

**3-Chloroacetanilide (2k)**: 102.5 mg (50%); offwhite crystals, mp 74 – 75 °C (lit.<sup>12</sup> 72.4 – 73.6 °C, lit.<sup>13</sup> 78 – 79 °C); <sup>1</sup>H NMR (300 MHz, DMSO) δ 10.13 (s, 1H), 7.81 (t, *J* = 1.9 Hz, 1H), 7.41 (ddd, *J* = 8.2, 1.8, 1.0 Hz, 1H), 7.31 (t, *J* = 8.0 Hz, 1H), 7.08 (dd, *J* = 7.9, 0.9 Hz, 1H), 2.05 (s, 3H); <sup>13</sup>C NMR (75 MHz, DMSO) δ 169.15, 141.20, 133.47, 130.82, 123.12, 118.82, 117.71, 24.50.

**2-Chloroacetanilide (2l)**: 47.7 mg (23%); grey crystals, mp 86 – 88 °C (lit.<sup>10</sup> 85 – 87 °C); <sup>1</sup>H NMR (300 MHz, DMSO) δ 9.50 (s, 1H), 7.71 (d, *J* = 7.5 Hz, 1H), 7.48 (dd, *J* = 8.0, 1.4 Hz, 1H), 7.31 (td, *J* = 7.8, 1.5 Hz, 1H), 7.19 (dd, *J* = 7.7, 1.4 Hz, 1H), 2.10 (s, 3H); <sup>13</sup>C NMR (75 MHz, DMSO) δ 169.05, 135.53, 129.85, 127.76, 126.85, 126.72, 126.58, 23.78.

**4-Methoxybenzoxonitrile (13a)**: Prepared following the procedure for ketoximes, then isolated by flash chromatography on silica (40 – 63 μm) using petroleum ether (PE, 40 – 60 °C) and ethyl acetate (EA) (gradient: 0 – 15% EA over 20 CV) to afford 106.0 mg (66%) white crystals, mp 59 – 60 °C (lit.<sup>14</sup> 59 – 60 °C); <sup>1</sup>H NMR (300 MHz, DMSO) δ 7.78 (d, *J* = 8.9 Hz, 2H), 7.11 (d, *J* = 8.9 Hz, 2H), 3.84 (s, 3H); <sup>13</sup>C NMR (75 MHz, DMSO) δ 163.16, 134.63, 119.60, 115.59, 103.25, 56.15.

<sup>8</sup> M. Heidelberger, W. A. Jacobs, *J. Am. Chem. Soc.* **1919**, *41*, 1450-1472.

<sup>9</sup> K. Dooleweerd, B. P. Fors, S. L. Buchwald, *Org. Lett.* **2010**, *12*, 2350-2353.

<sup>10</sup> K. S. Niralwad, B. B. Shingate, M. S. Shingare, *Lett. Org. Chem.* **2011**, *8*, 274-277.

<sup>11</sup> R. A. Benkeser, P. E. Brumfield, *J. Am. Chem. Soc.* **1951**, *73*, 4770-4773.

<sup>12</sup> D. C. Owsley, J. J. Bloomfield, *Synthesis* **1977**, 118-120.

<sup>13</sup> B. B. Dey, R. K. Maller, B. R. Pai, *J. Sci. Ind. Res.* **1951**, *10*, 140-144.

<sup>14</sup> D. S. Bhalerao, U. S. Mahajan, K. H. Chaudhari, K. G. Akamanchi, *J. Org. Chem.* **2007**, *72*, 662-665.

## 12. Copies of $^1\text{H}$ - and $^{13}\text{C}$ -NMR spectra

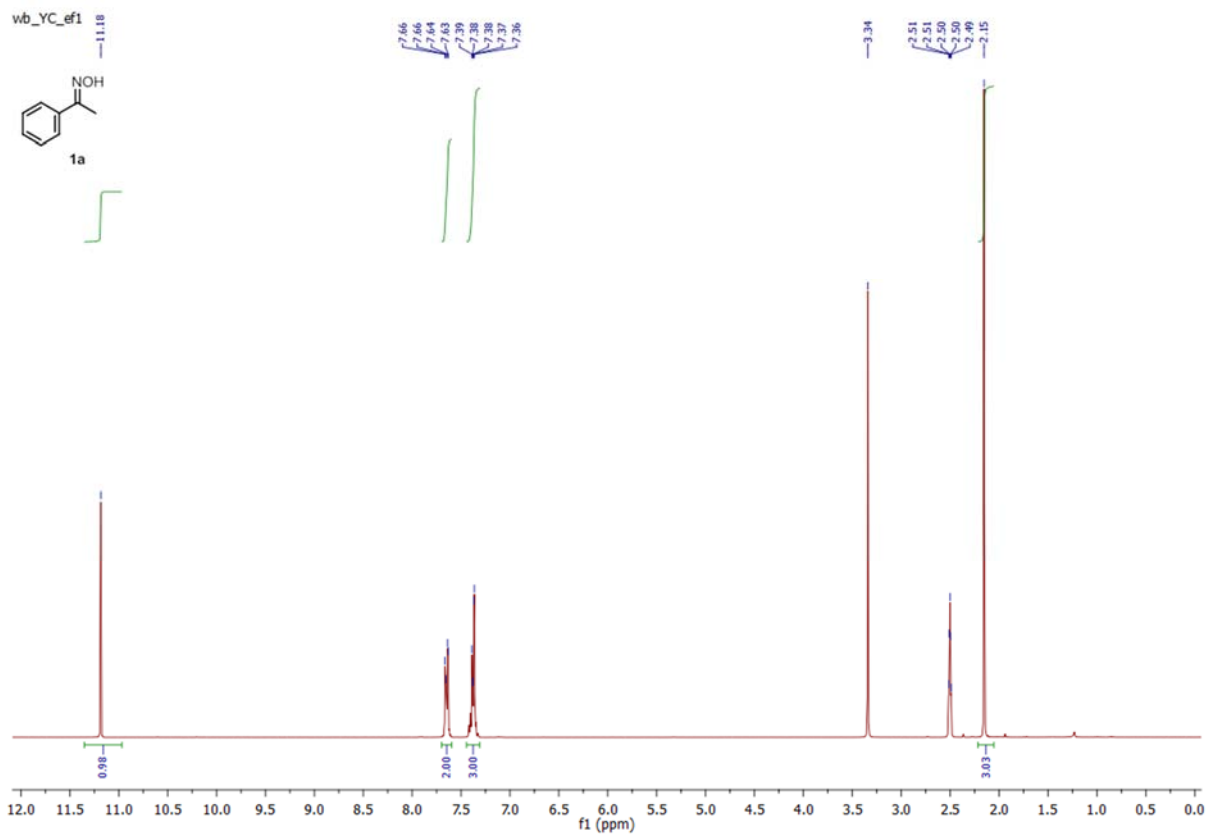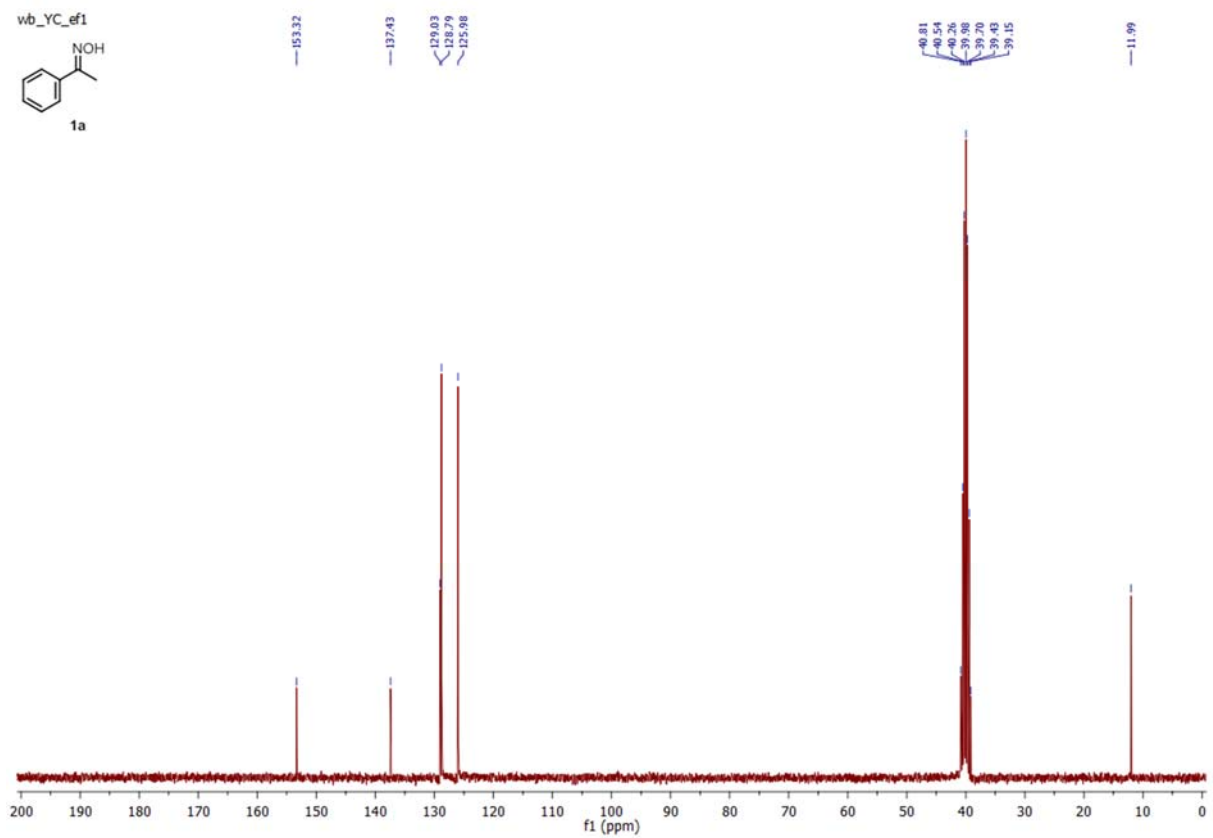

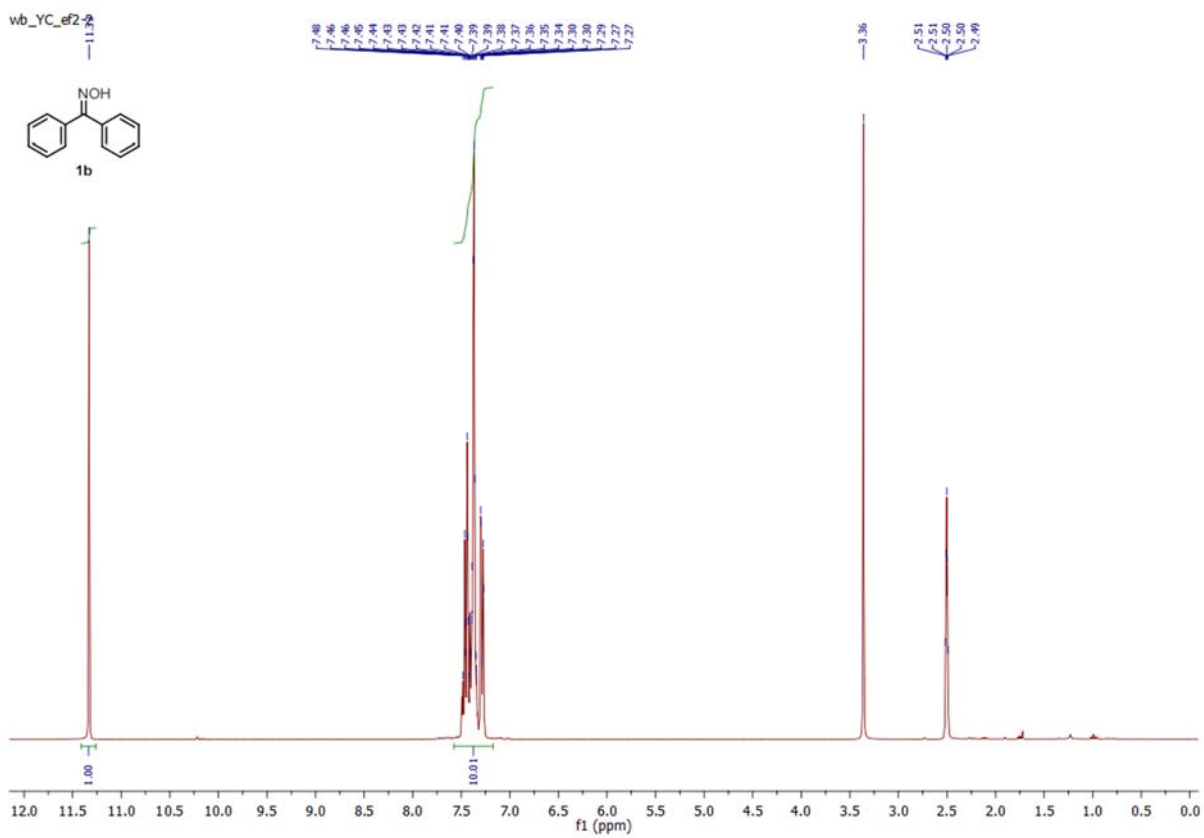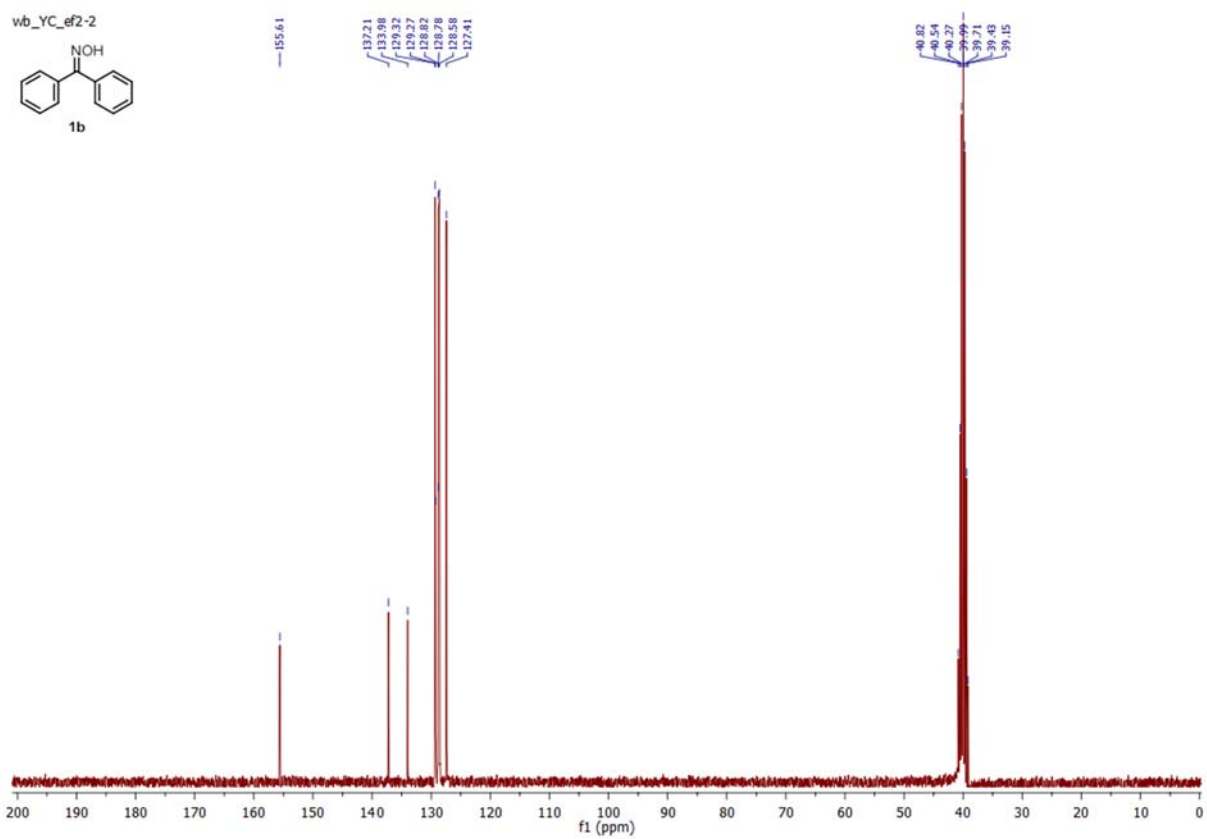

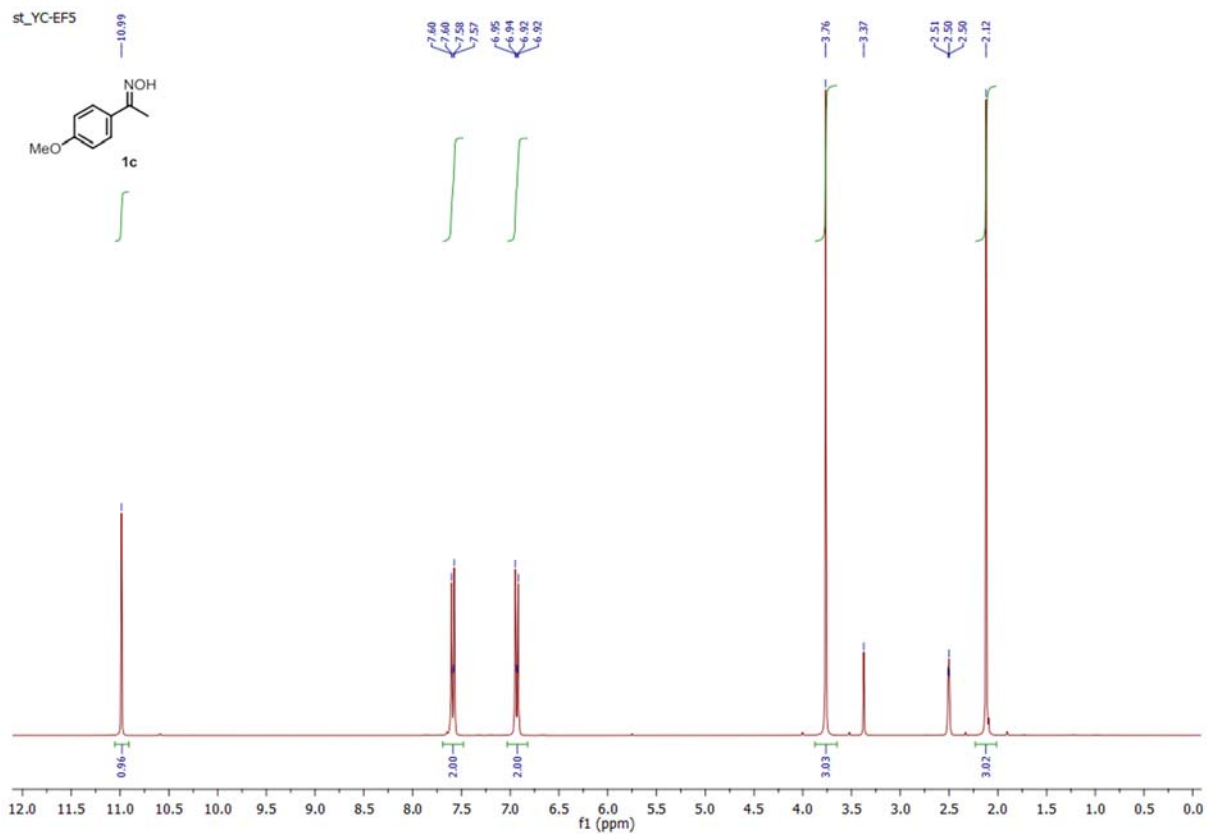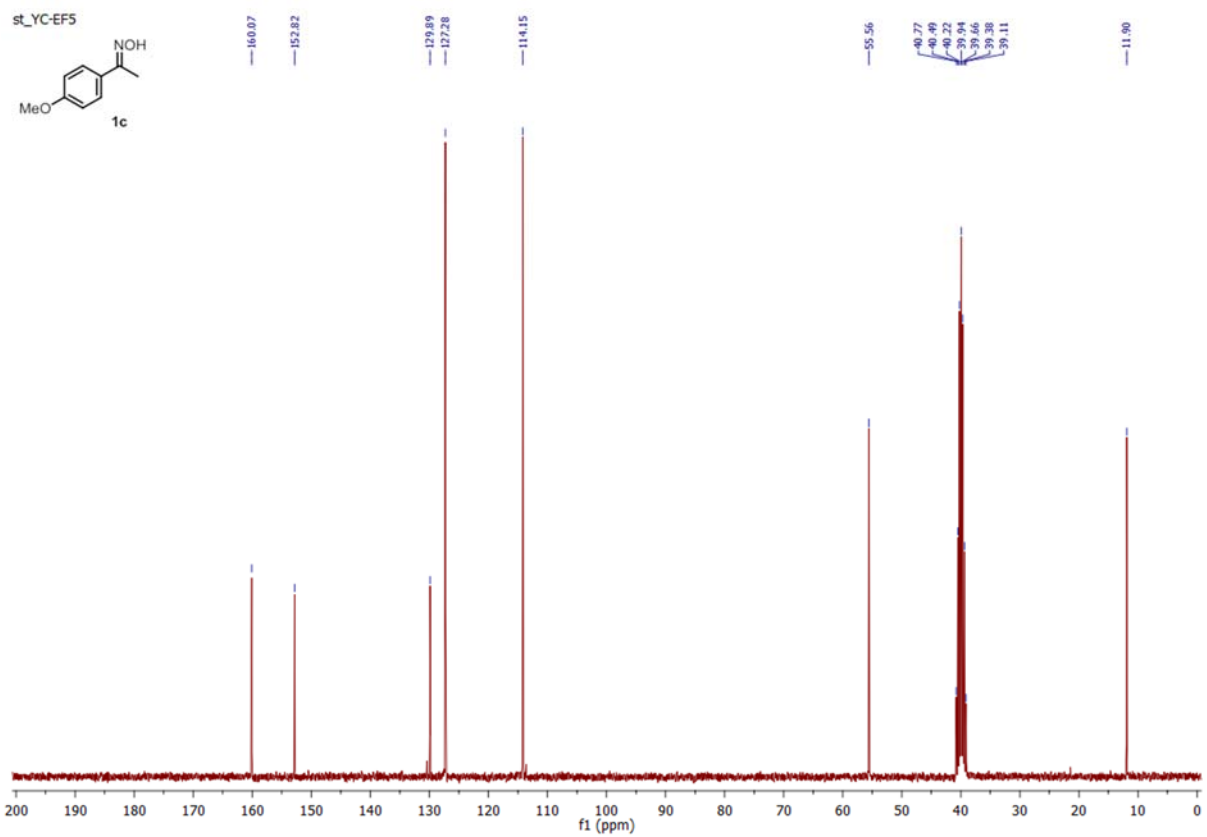

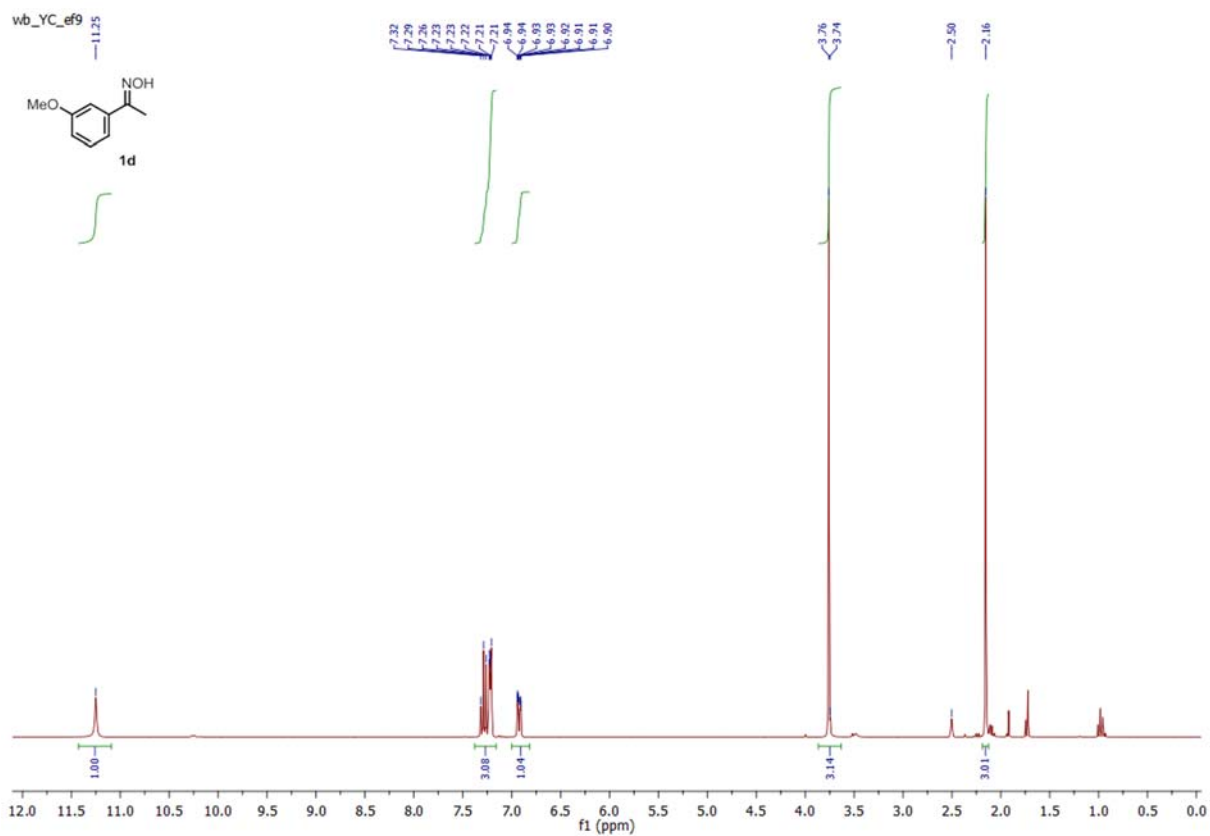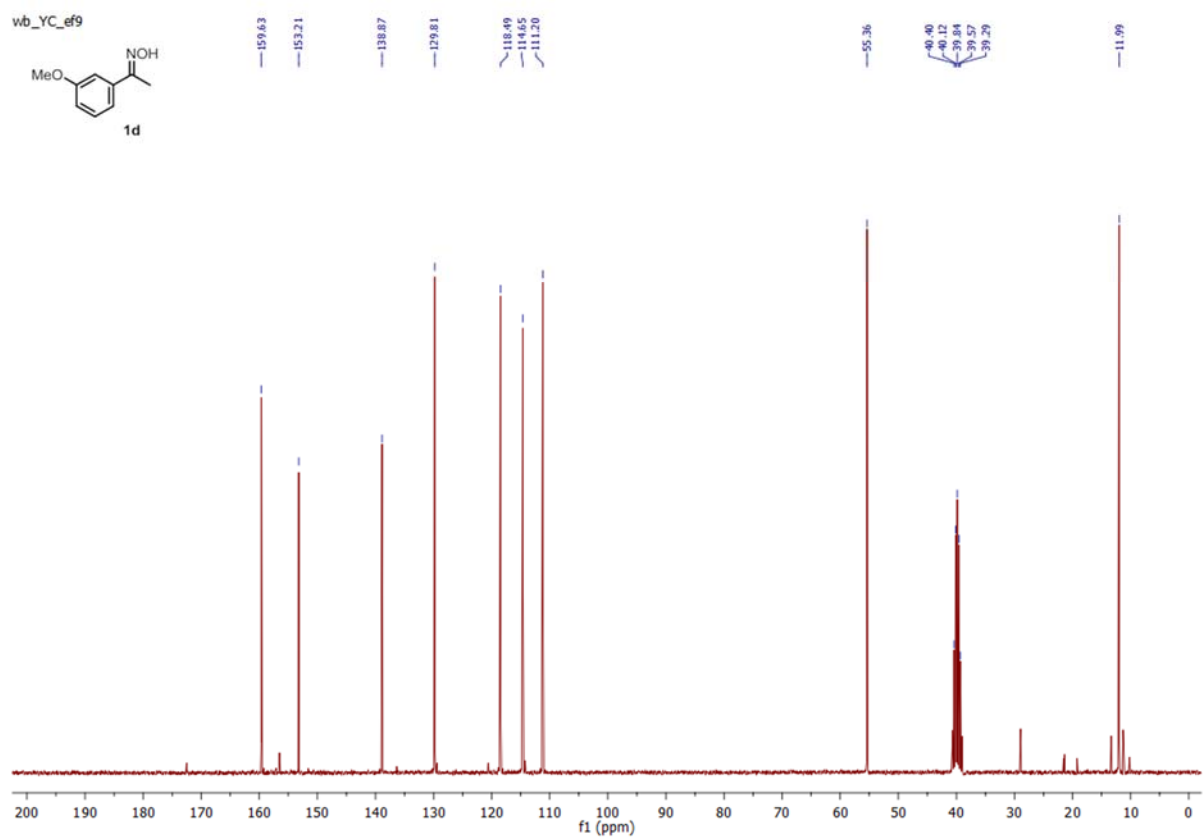

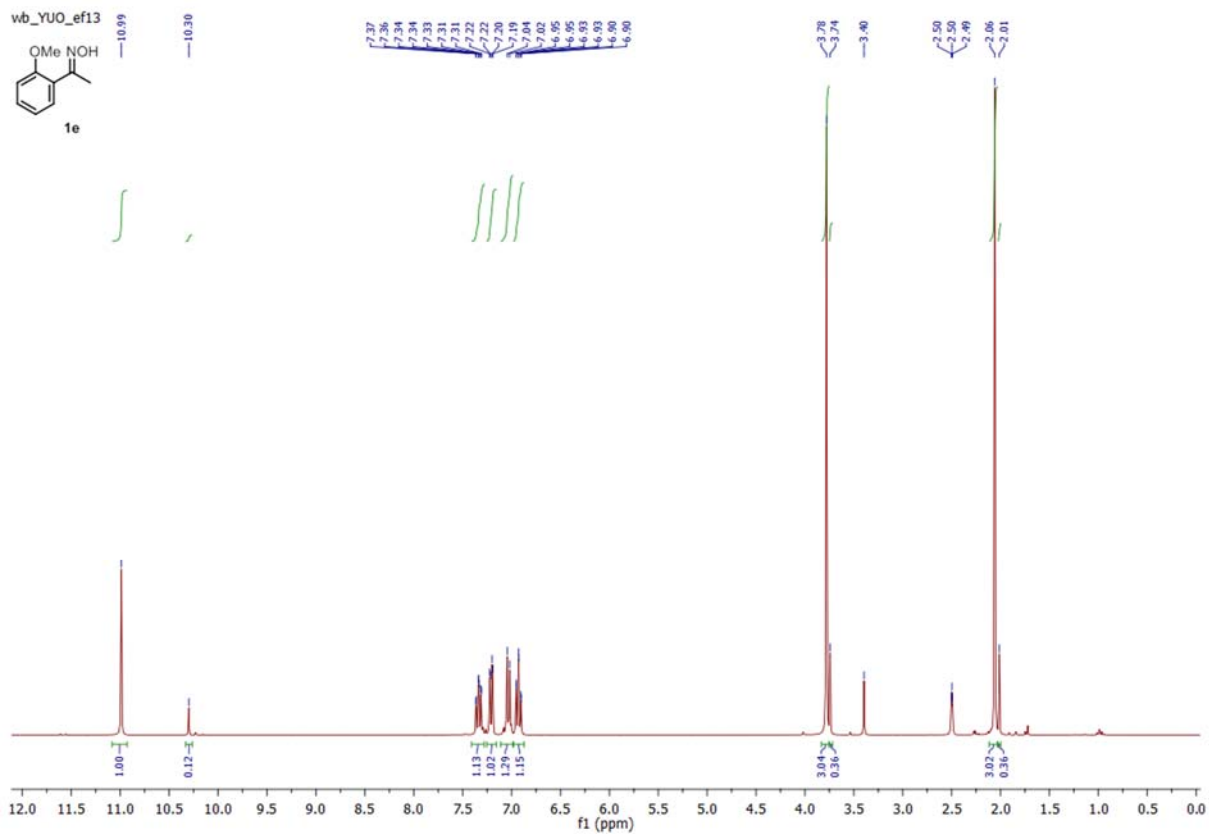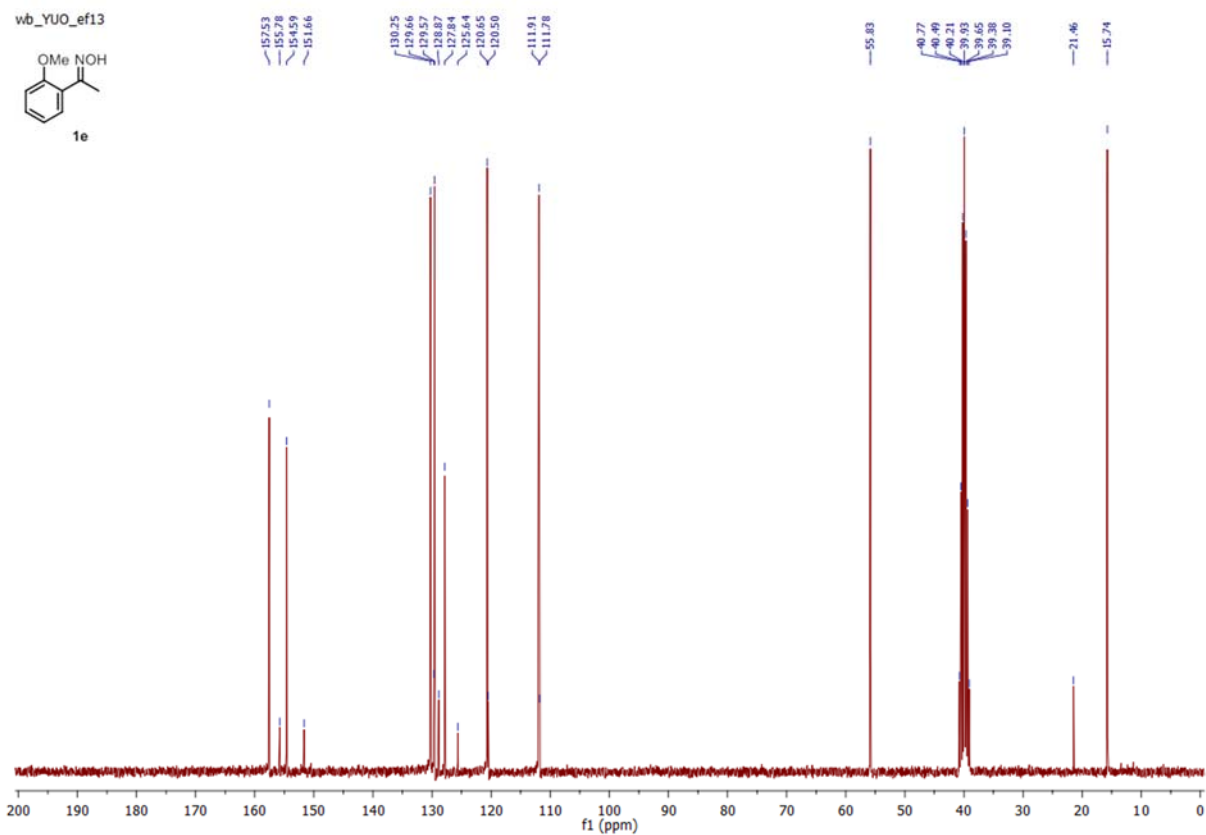

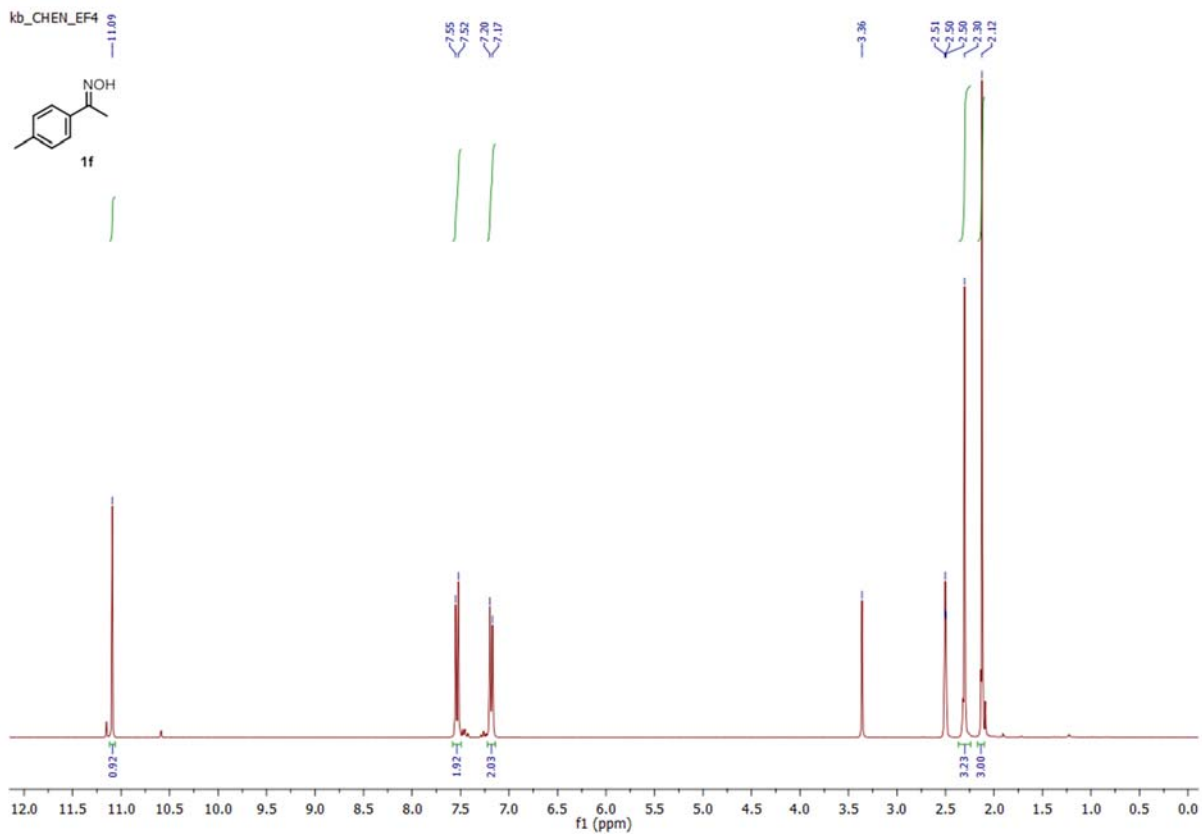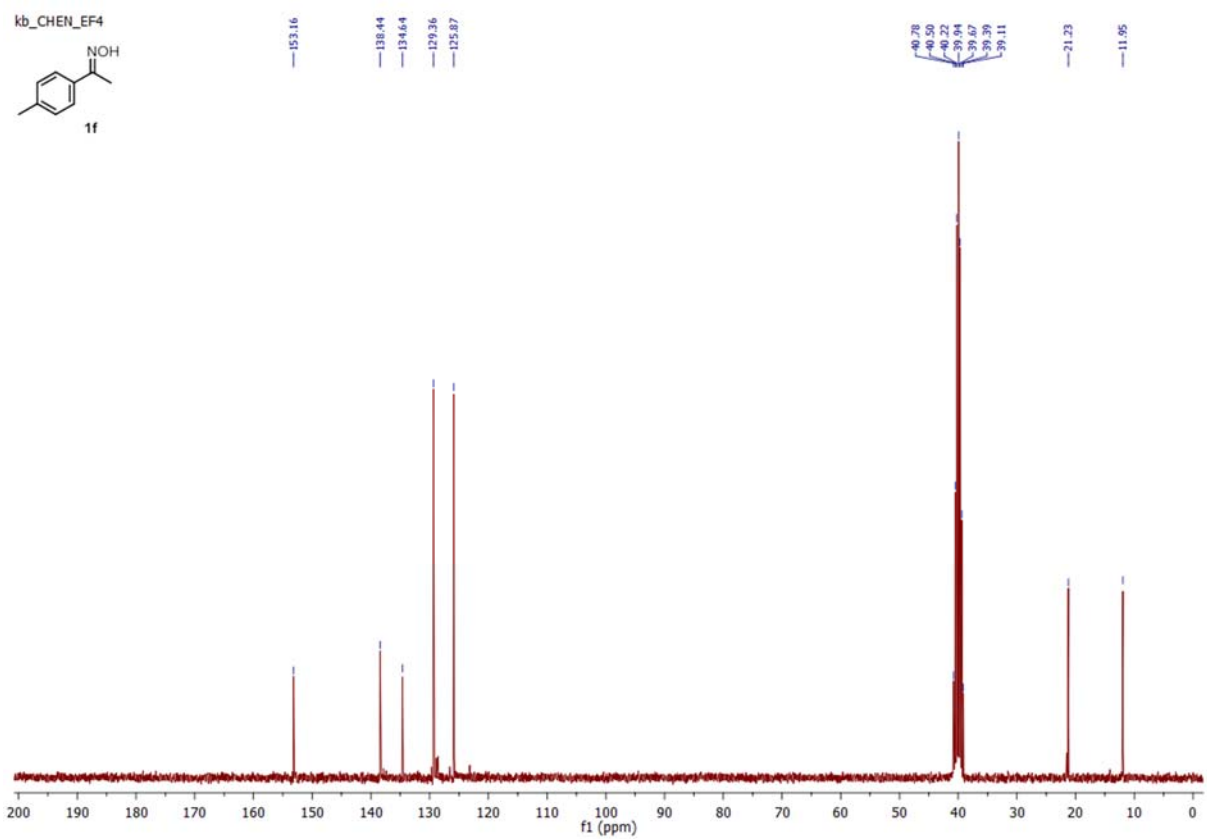

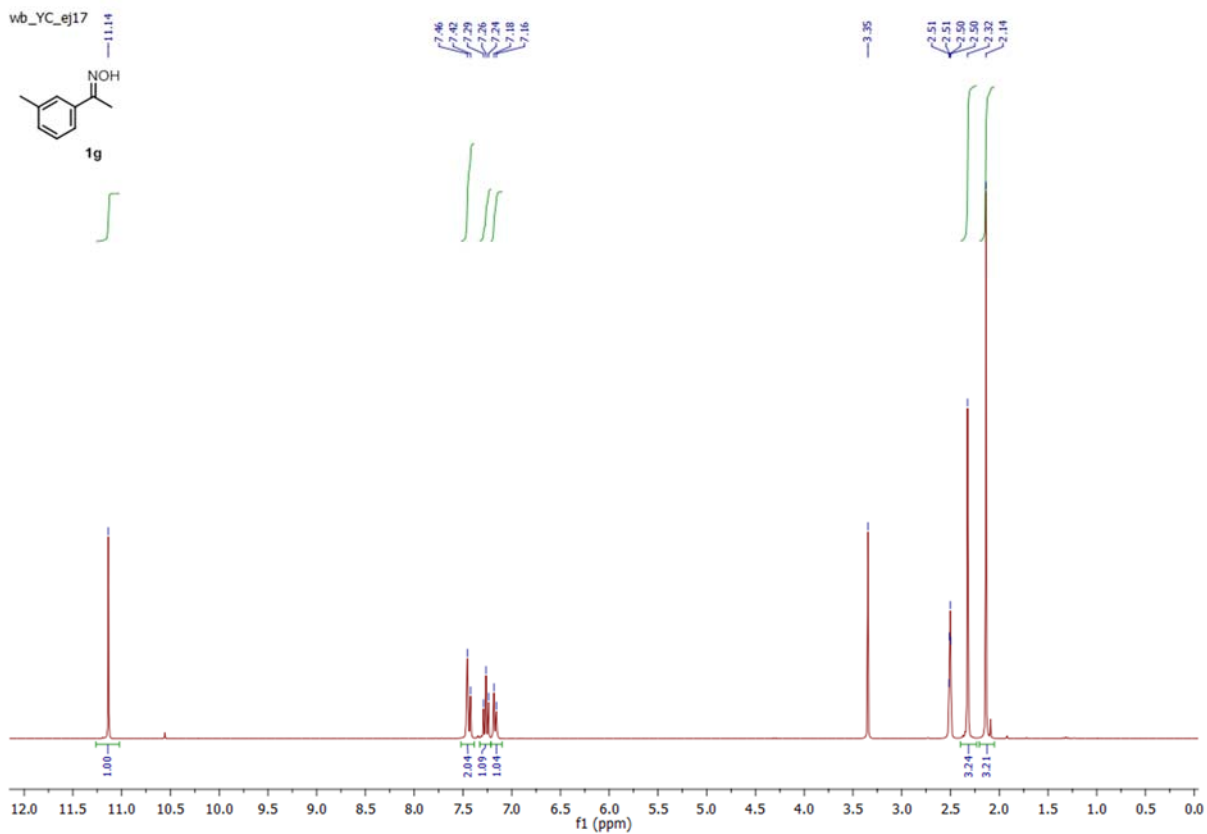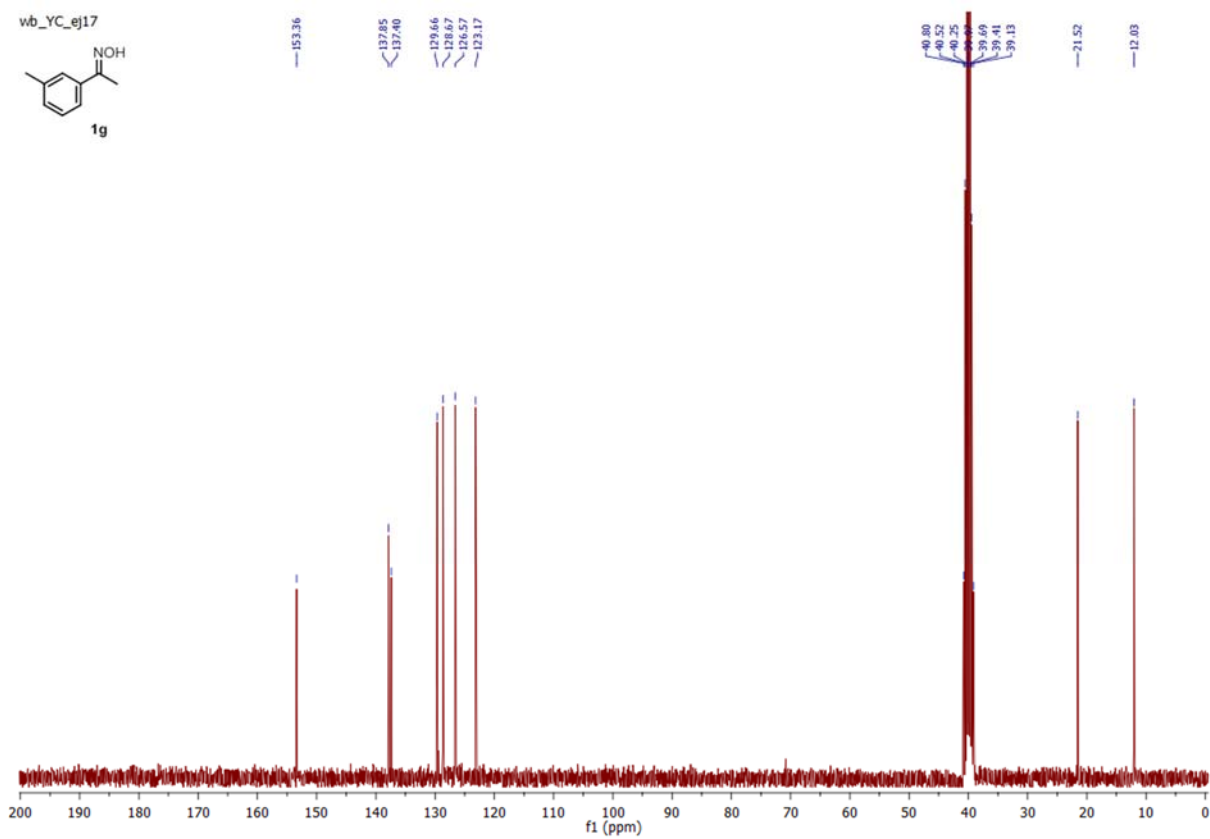



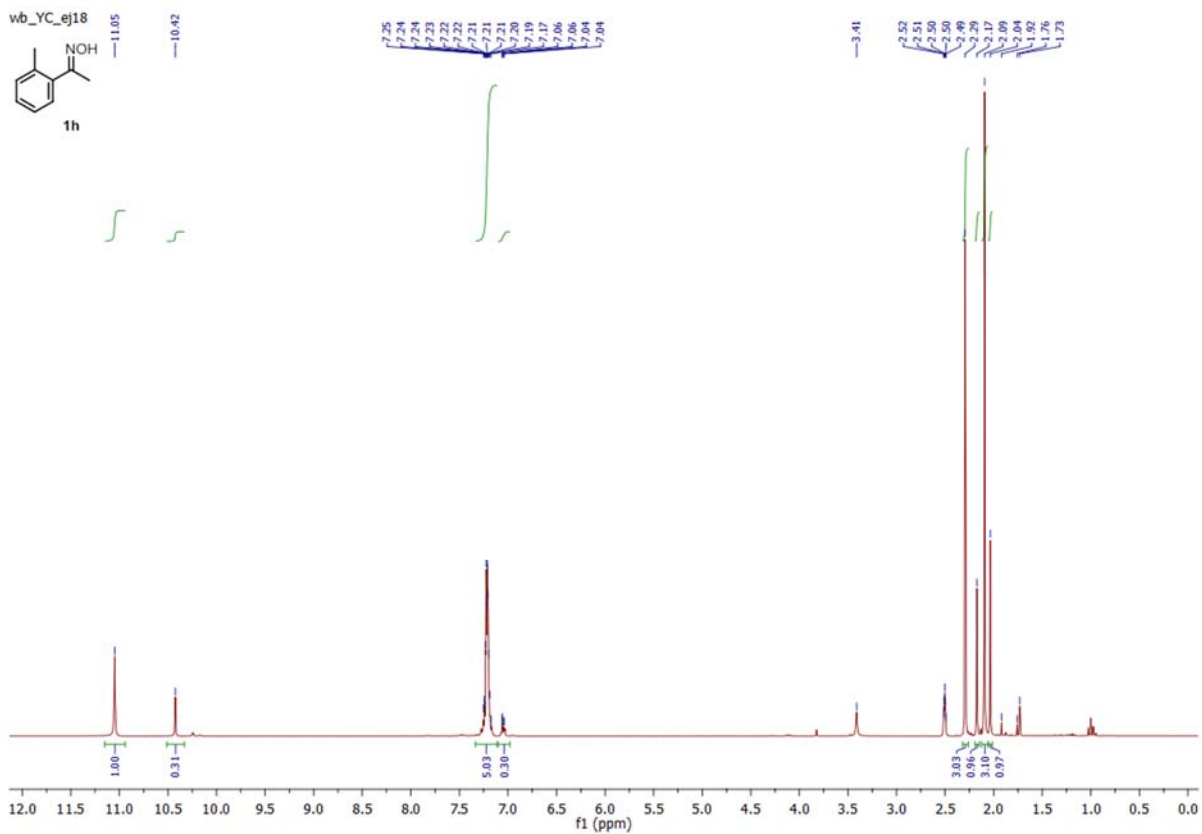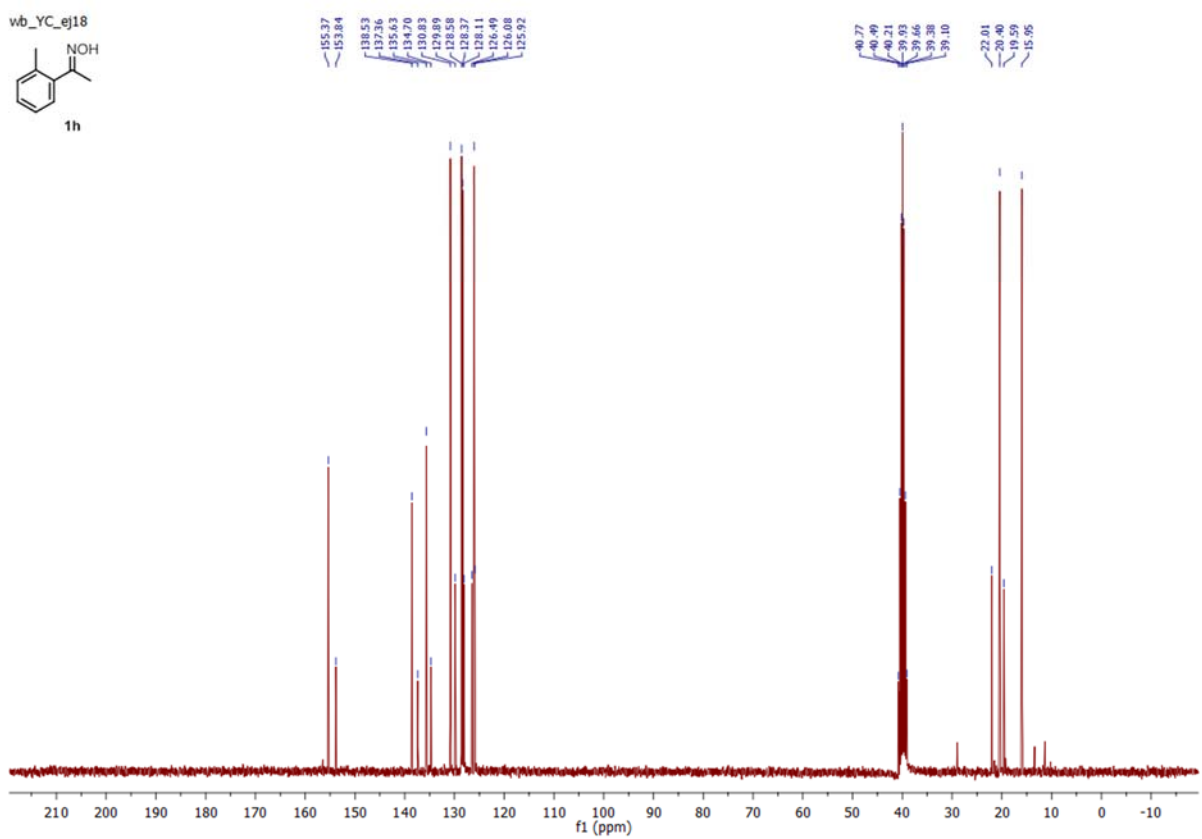

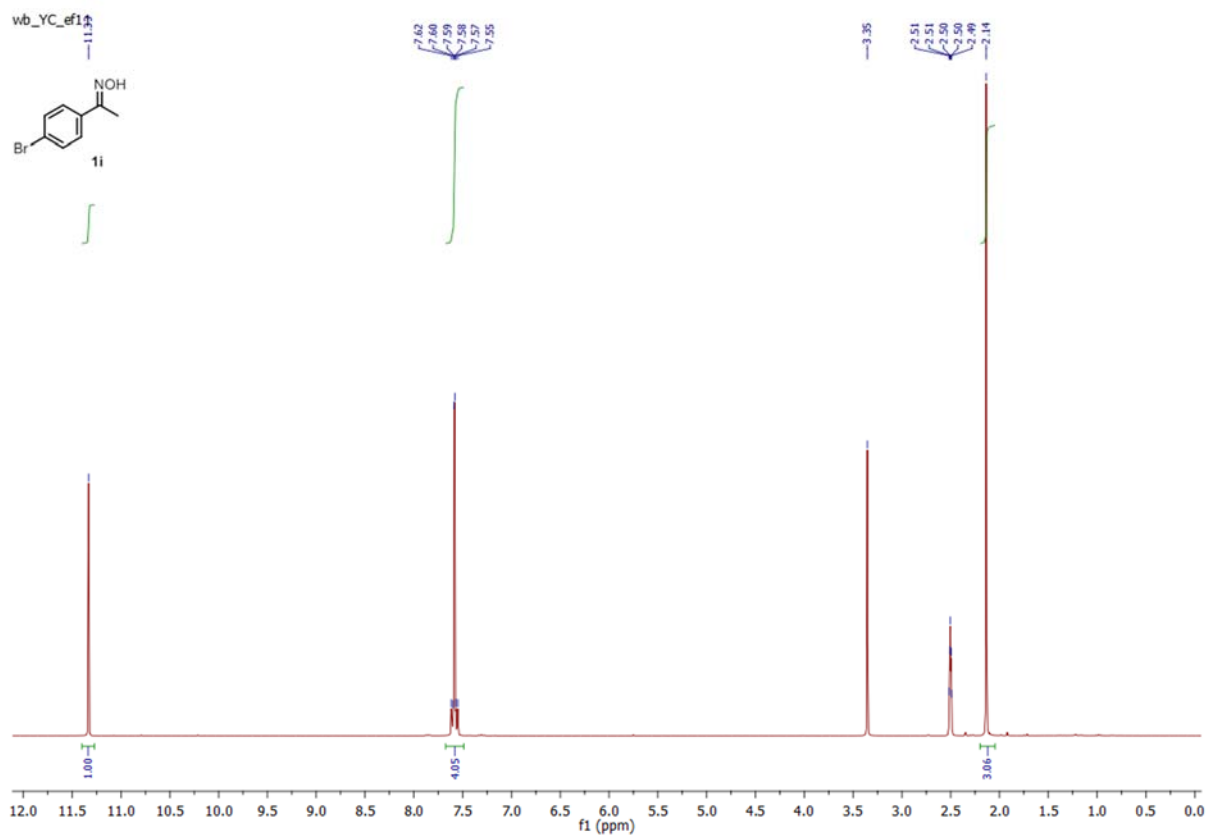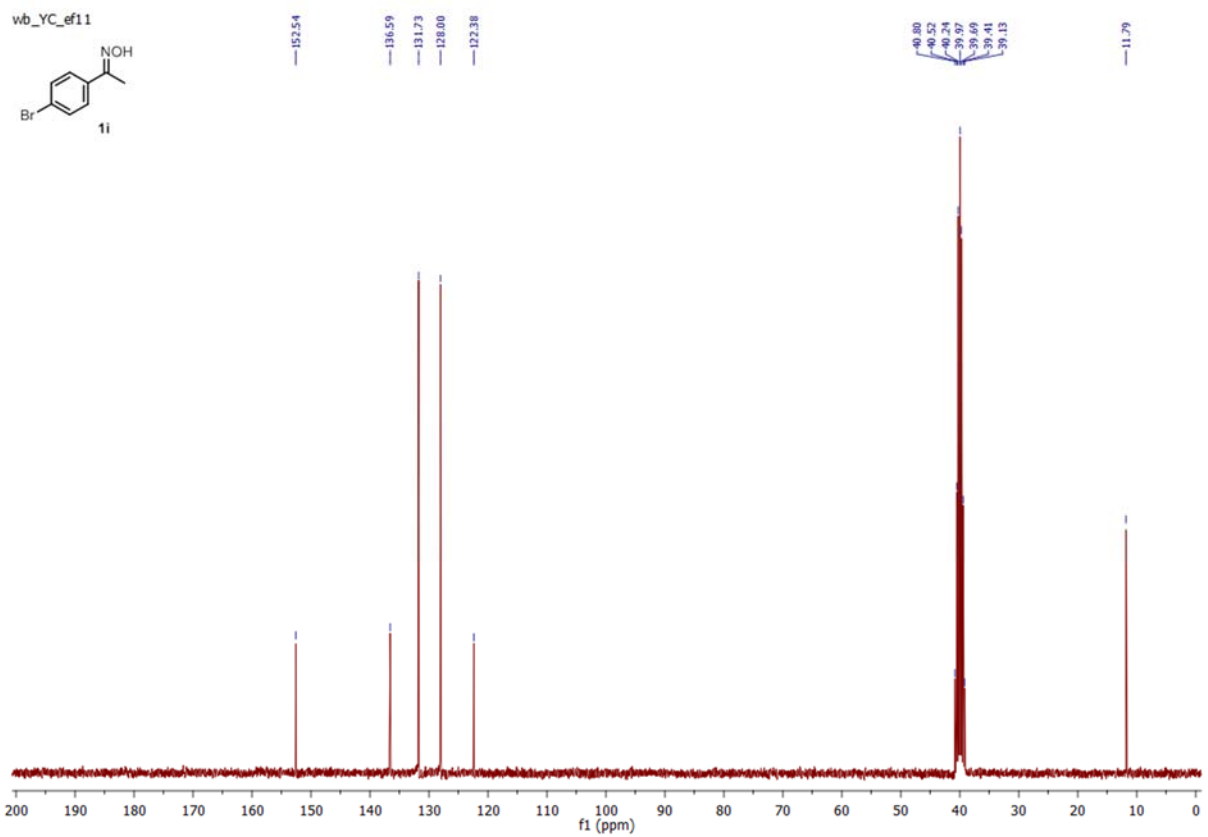

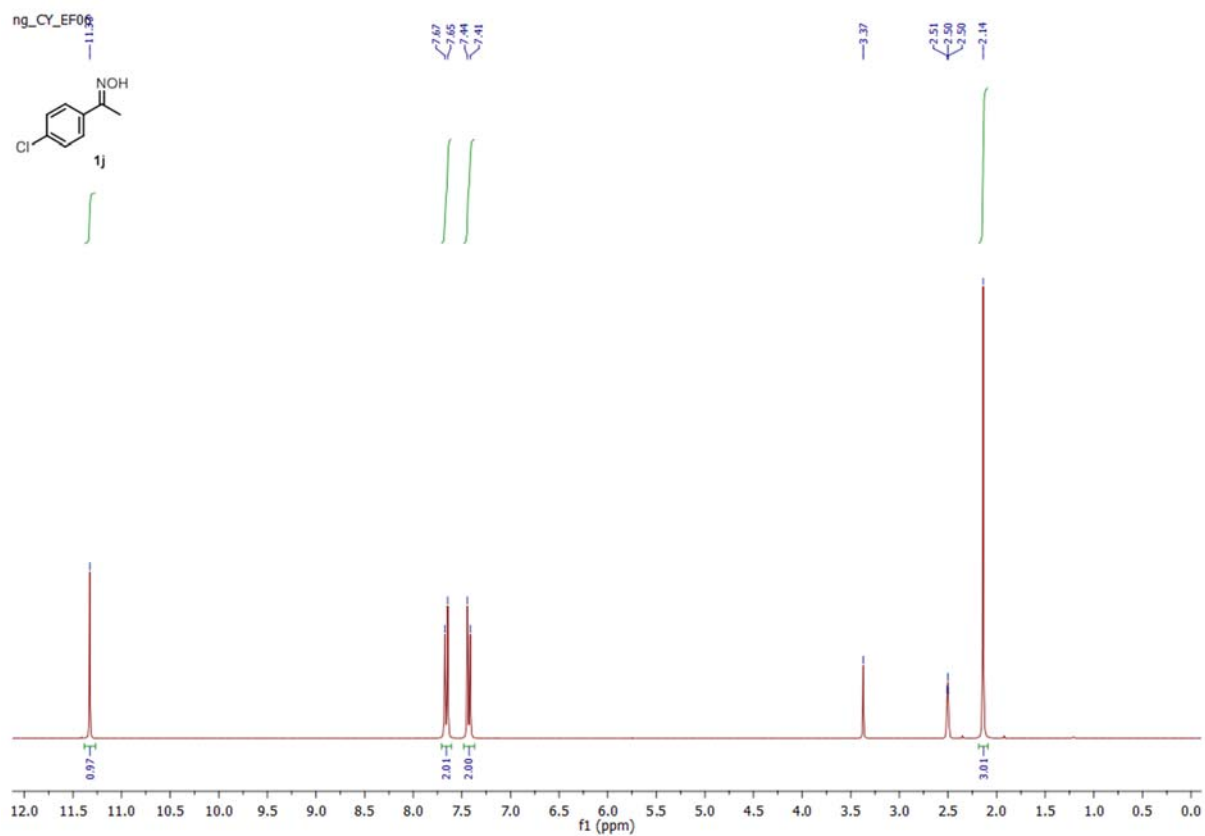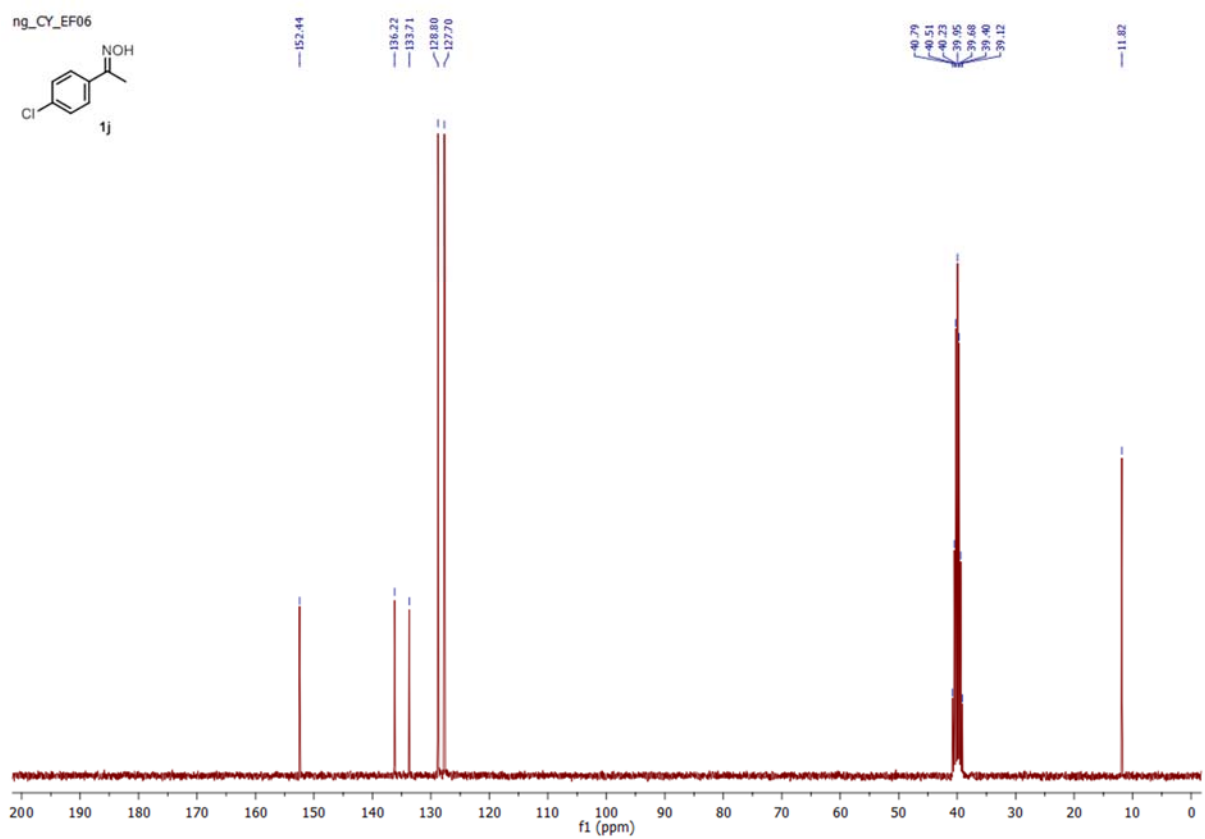

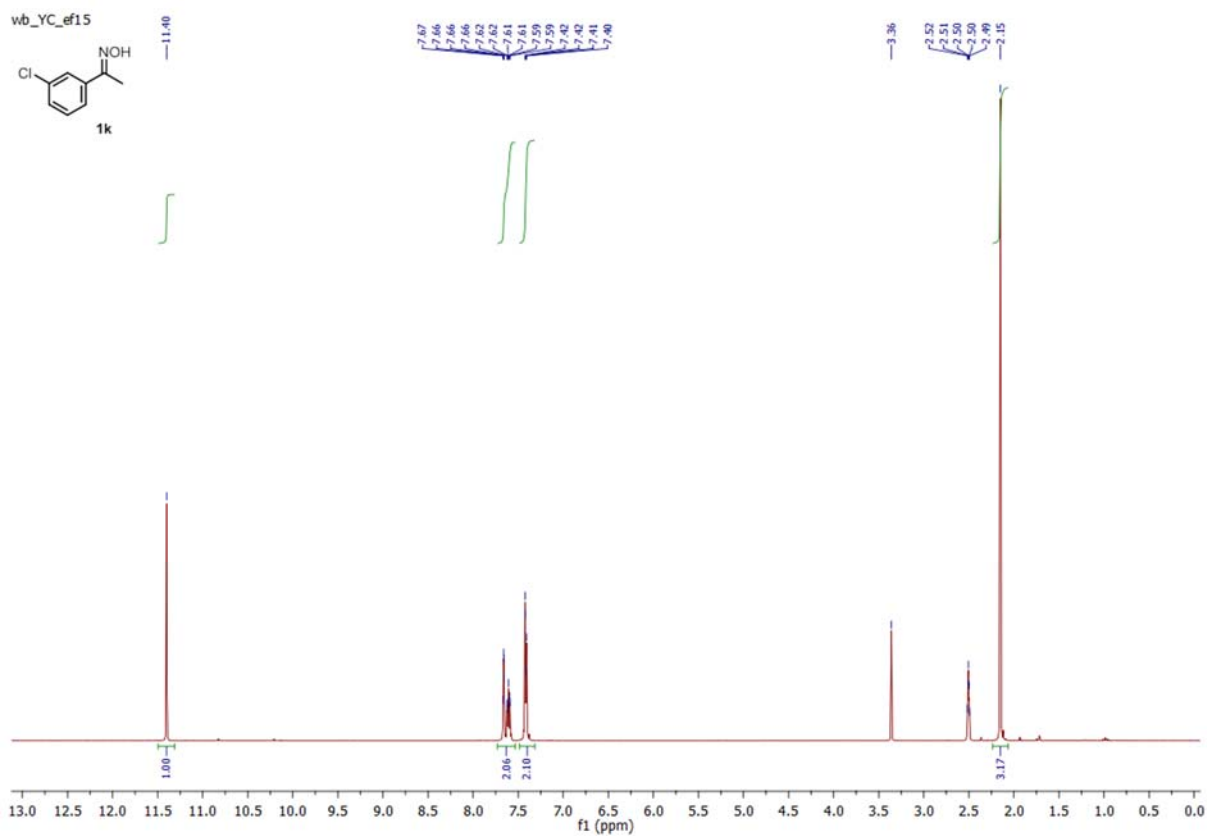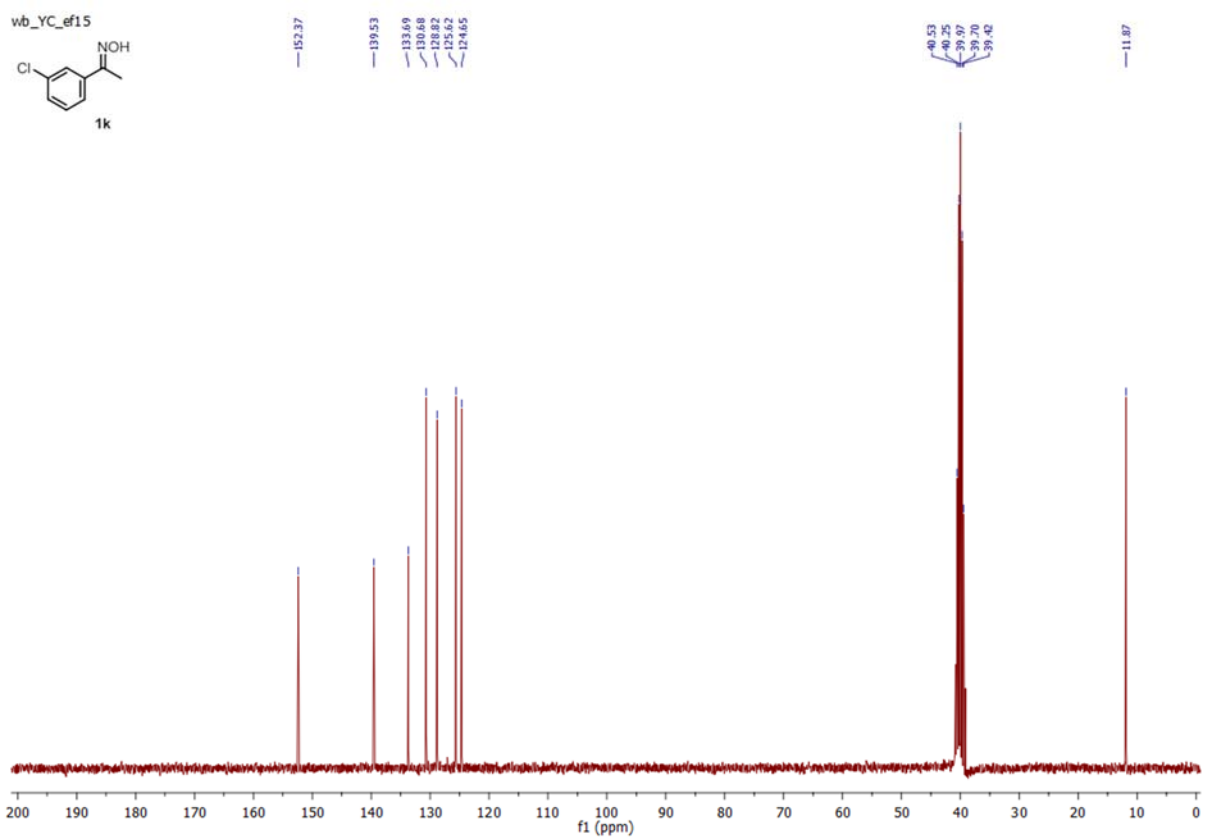

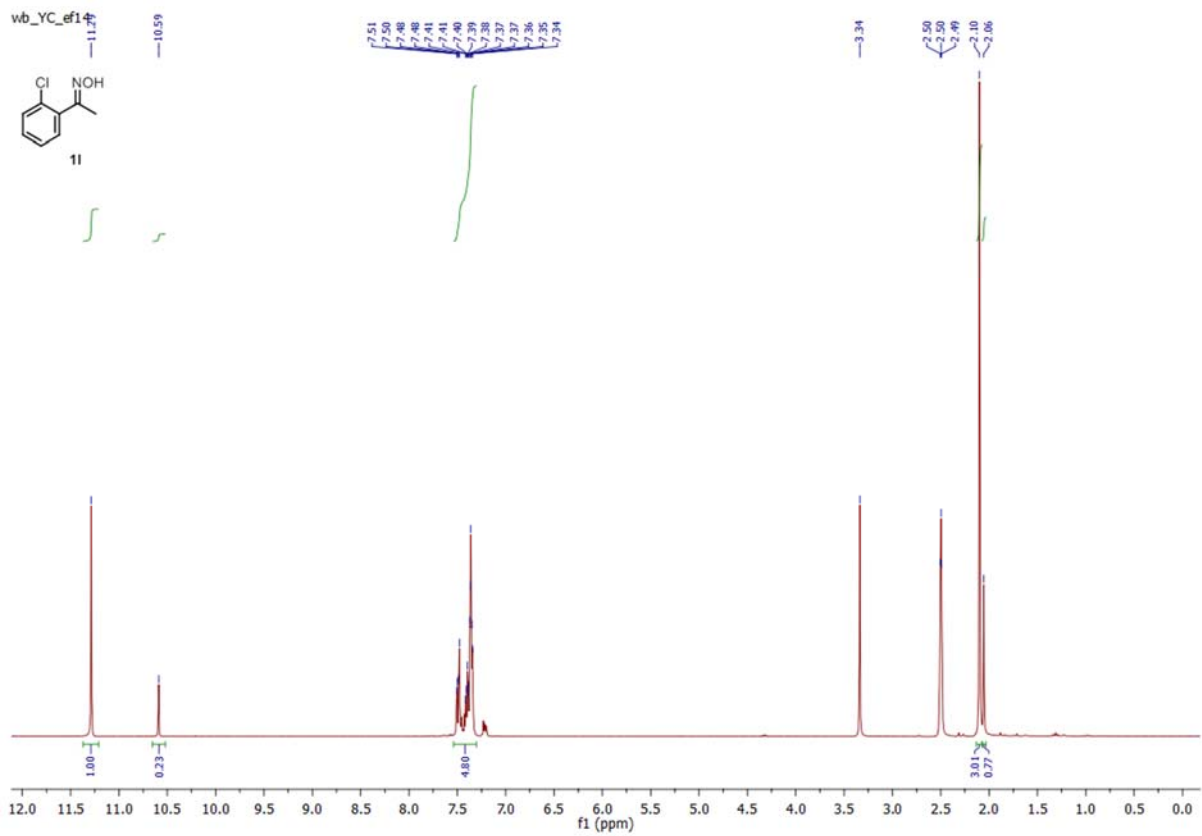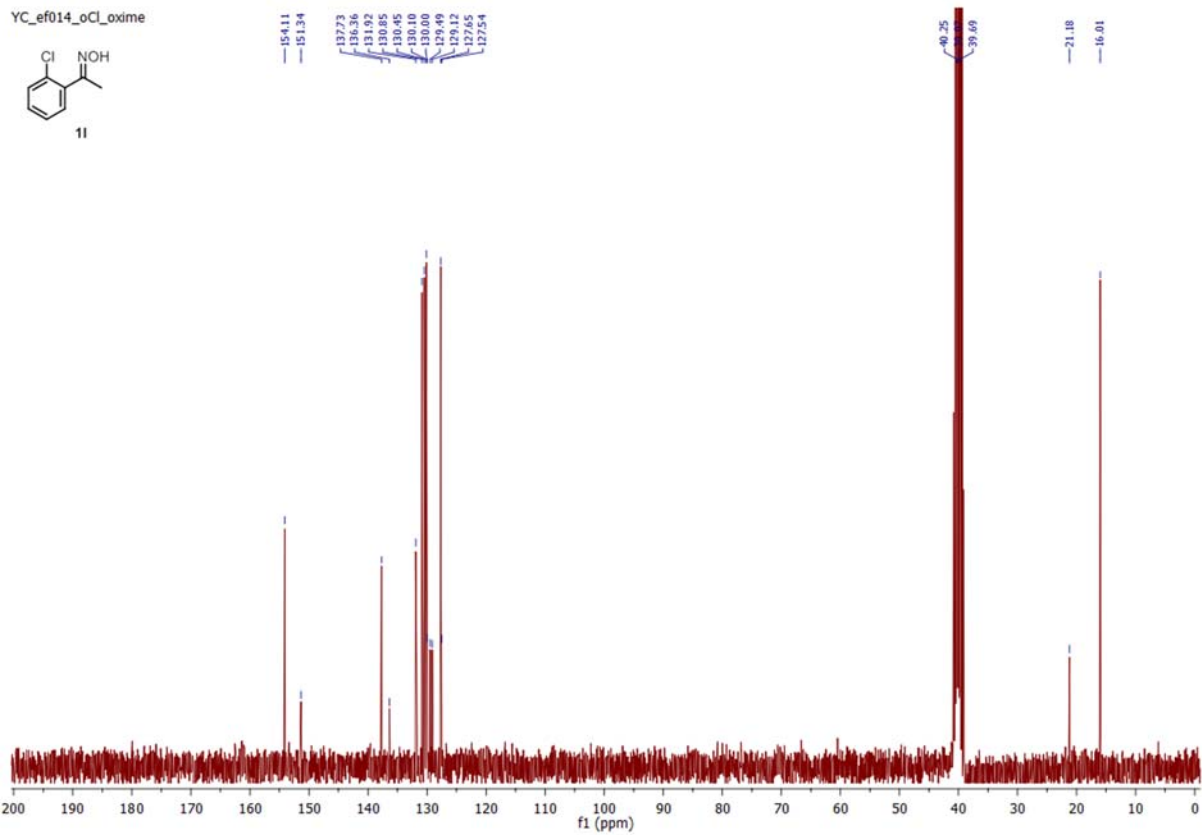

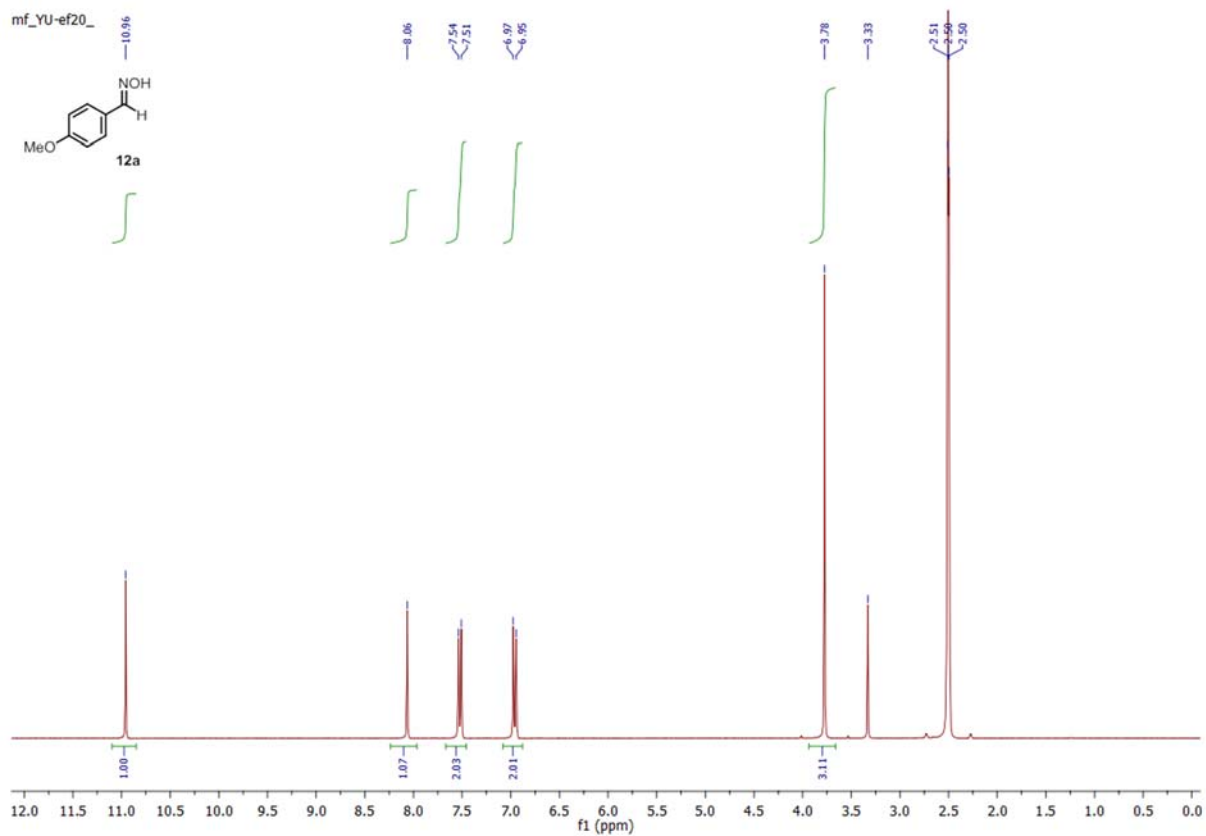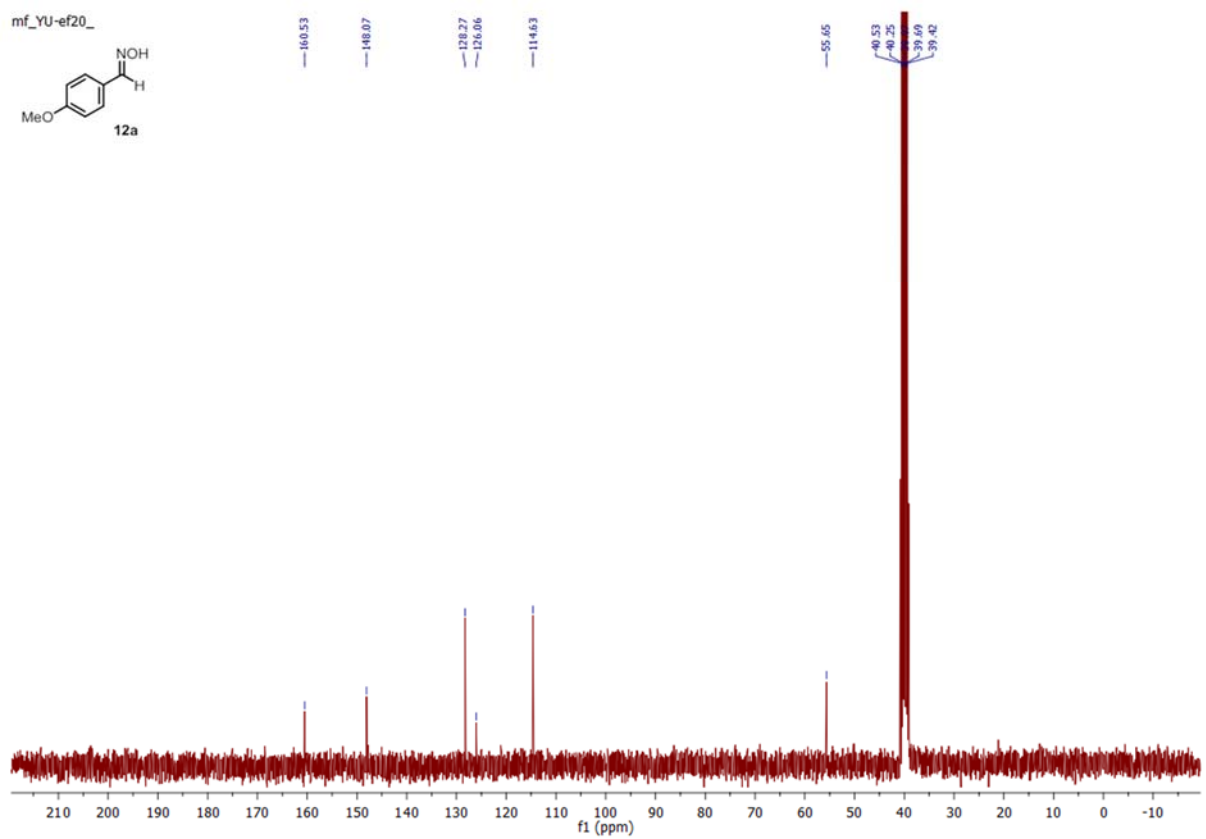

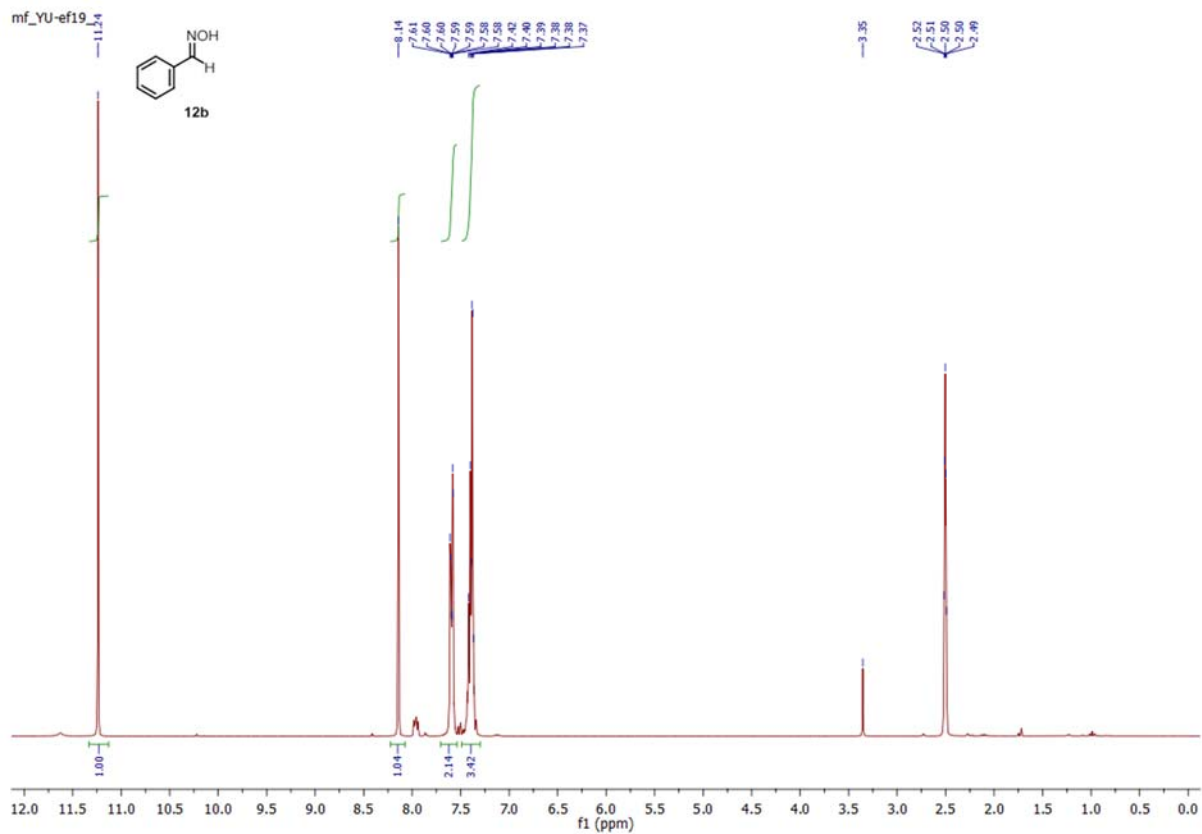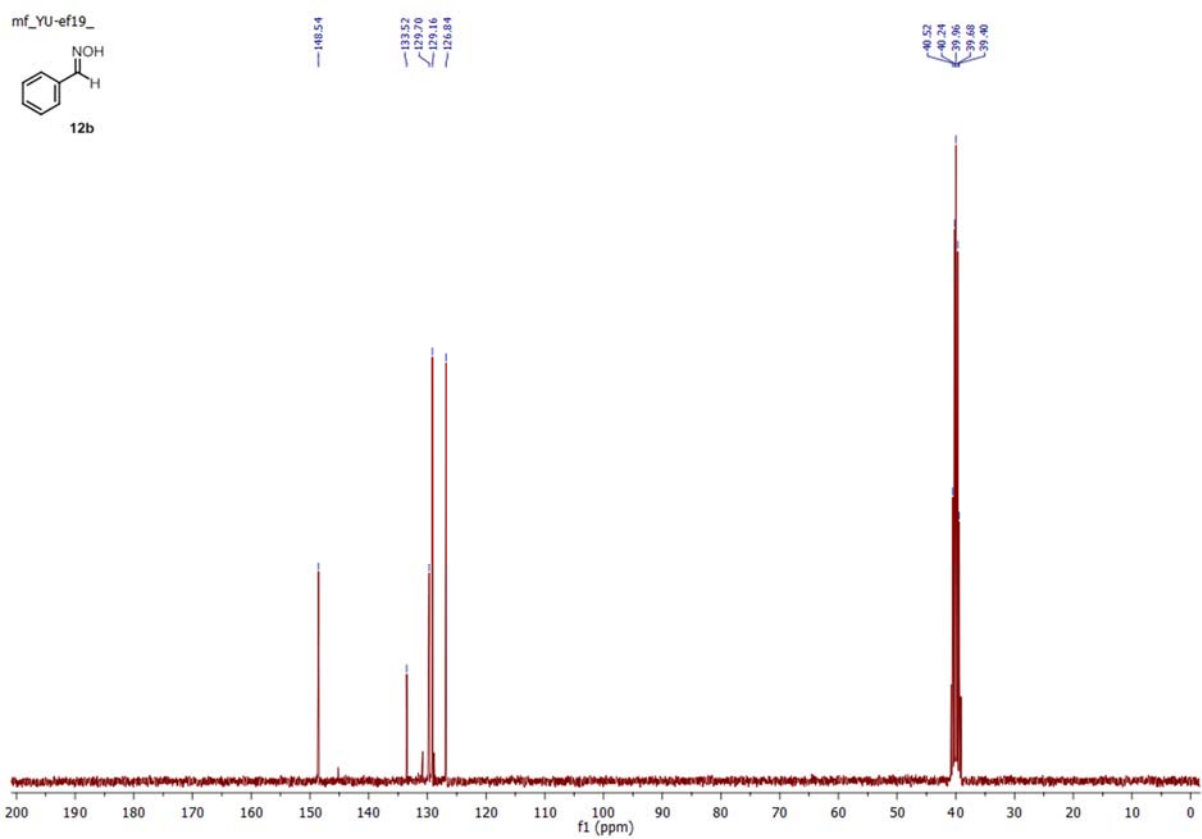

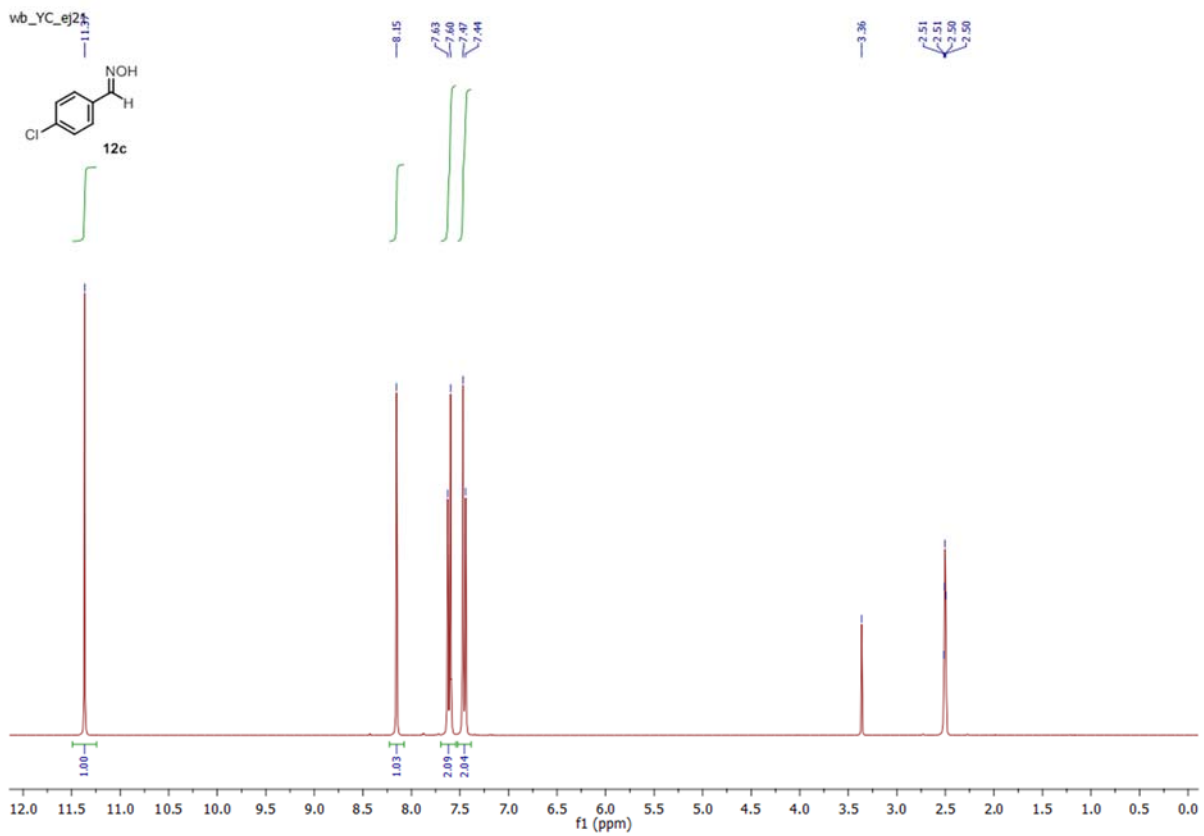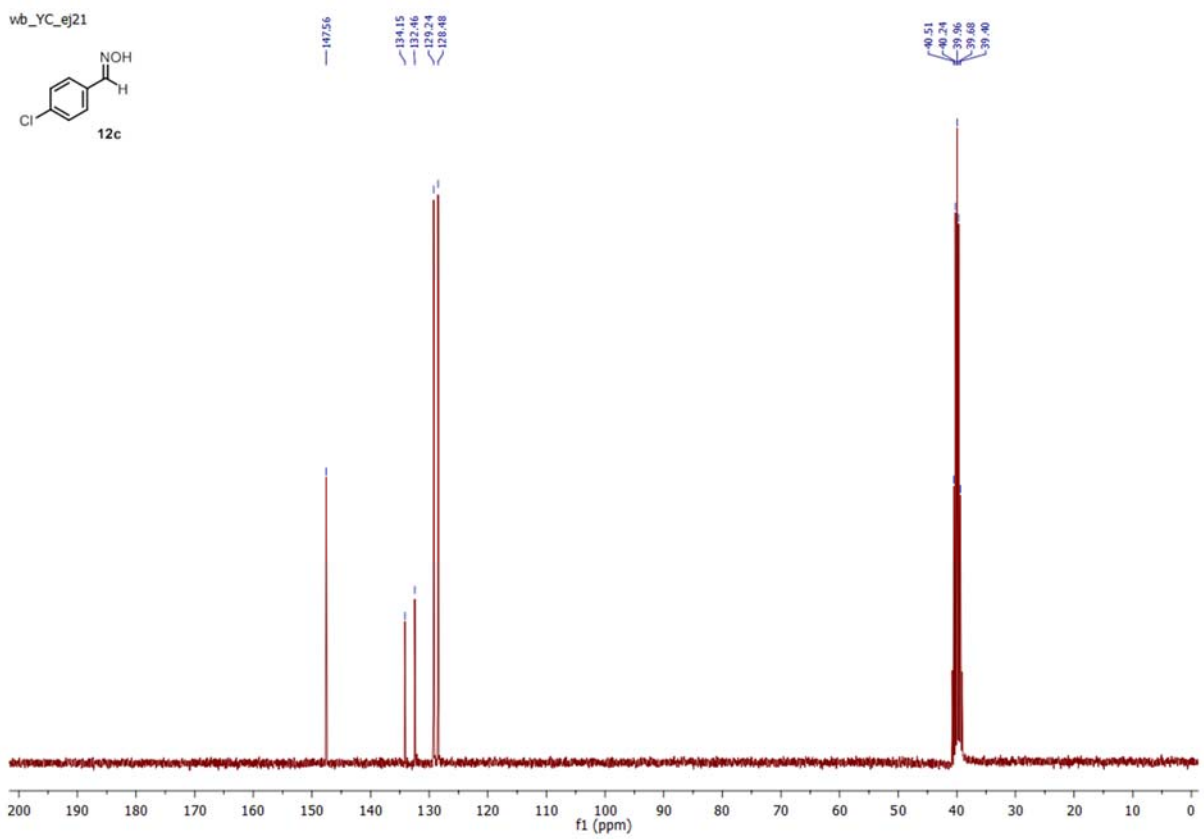



wb\_YC\_ej1-6

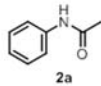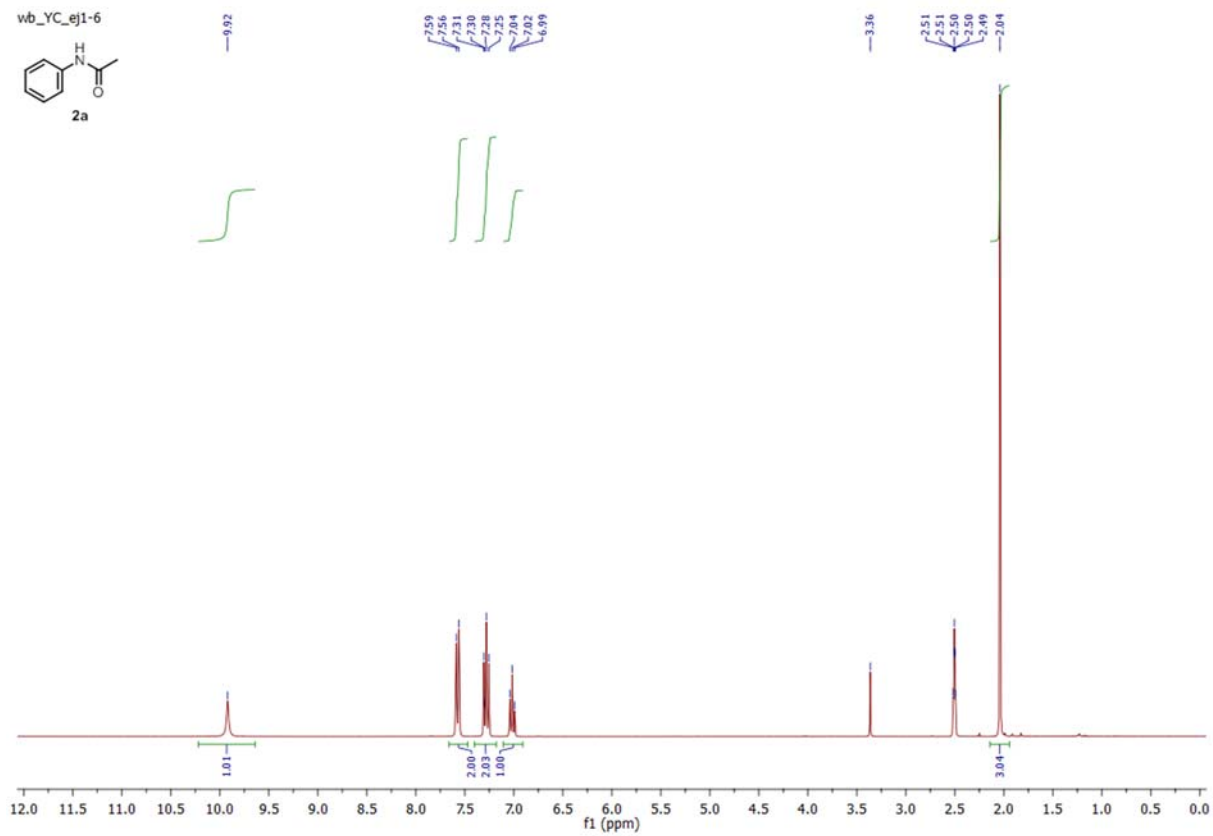

wb\_YC\_ej1-6

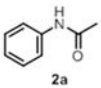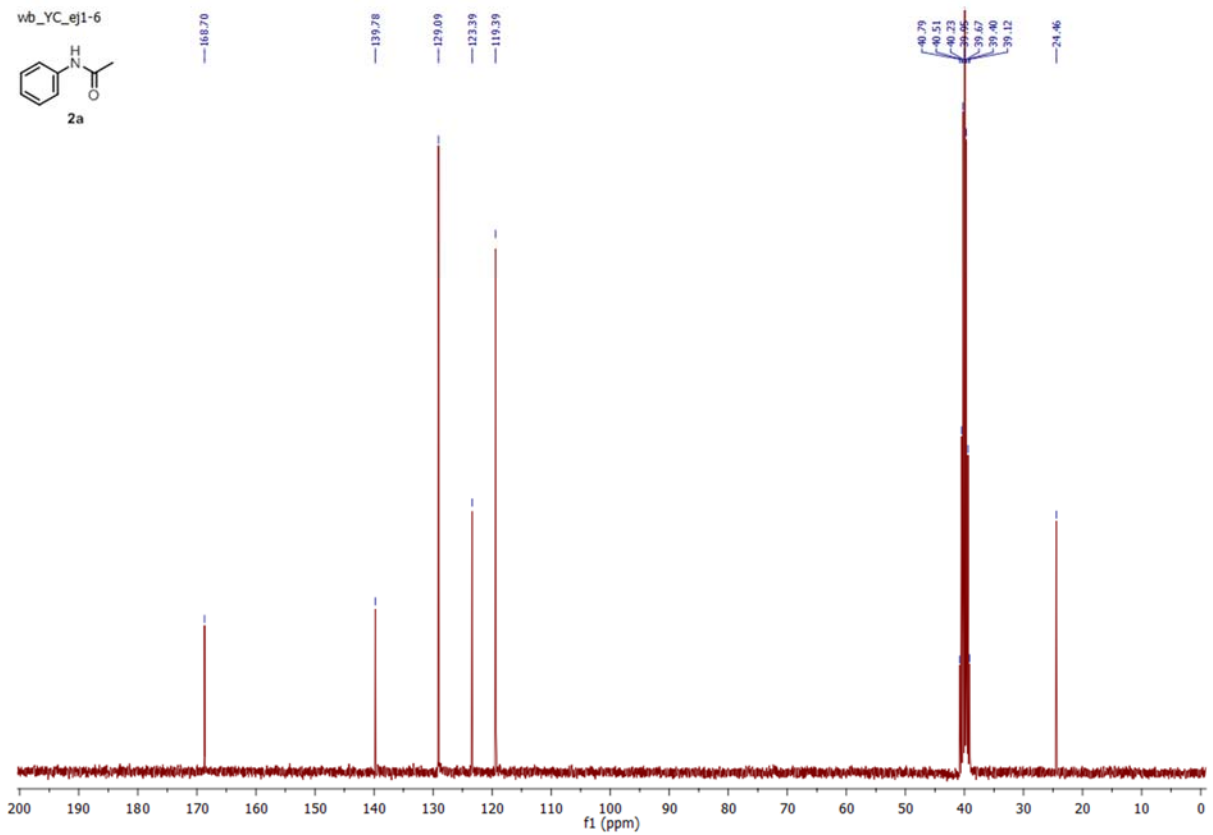

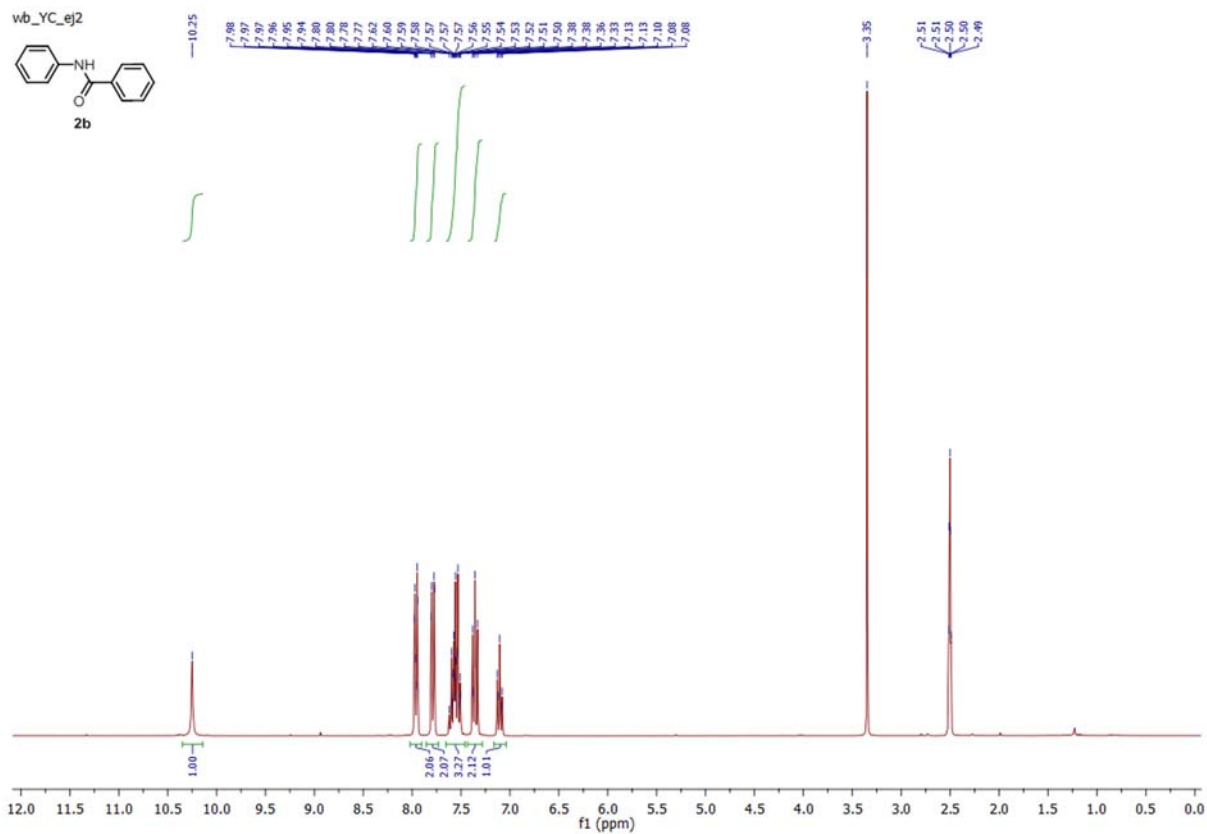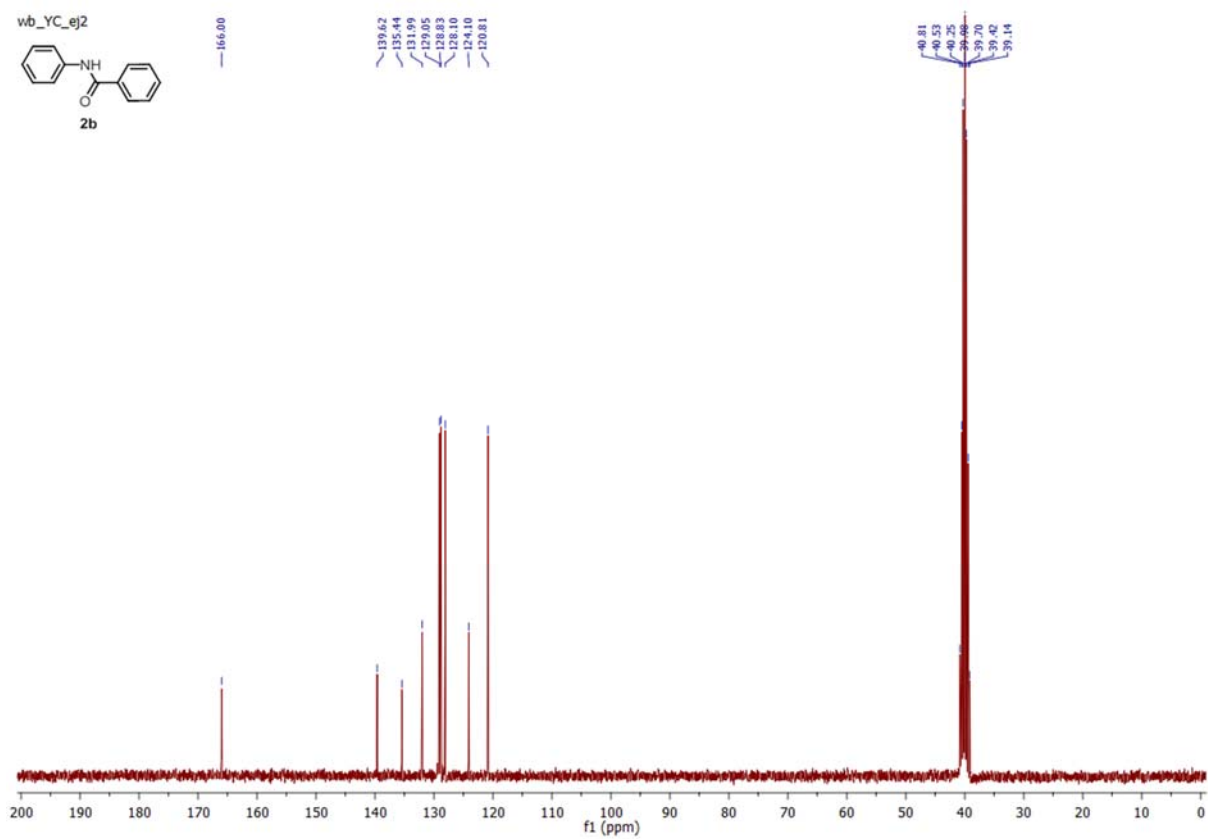

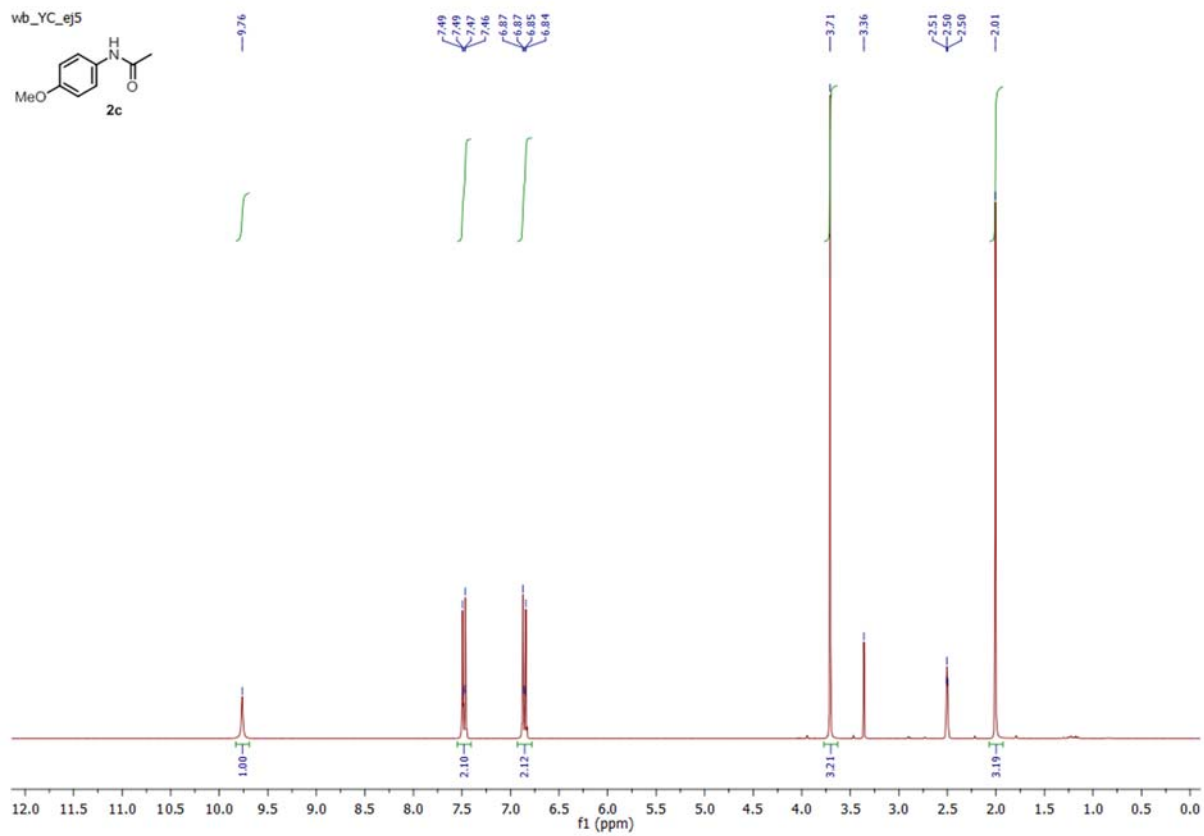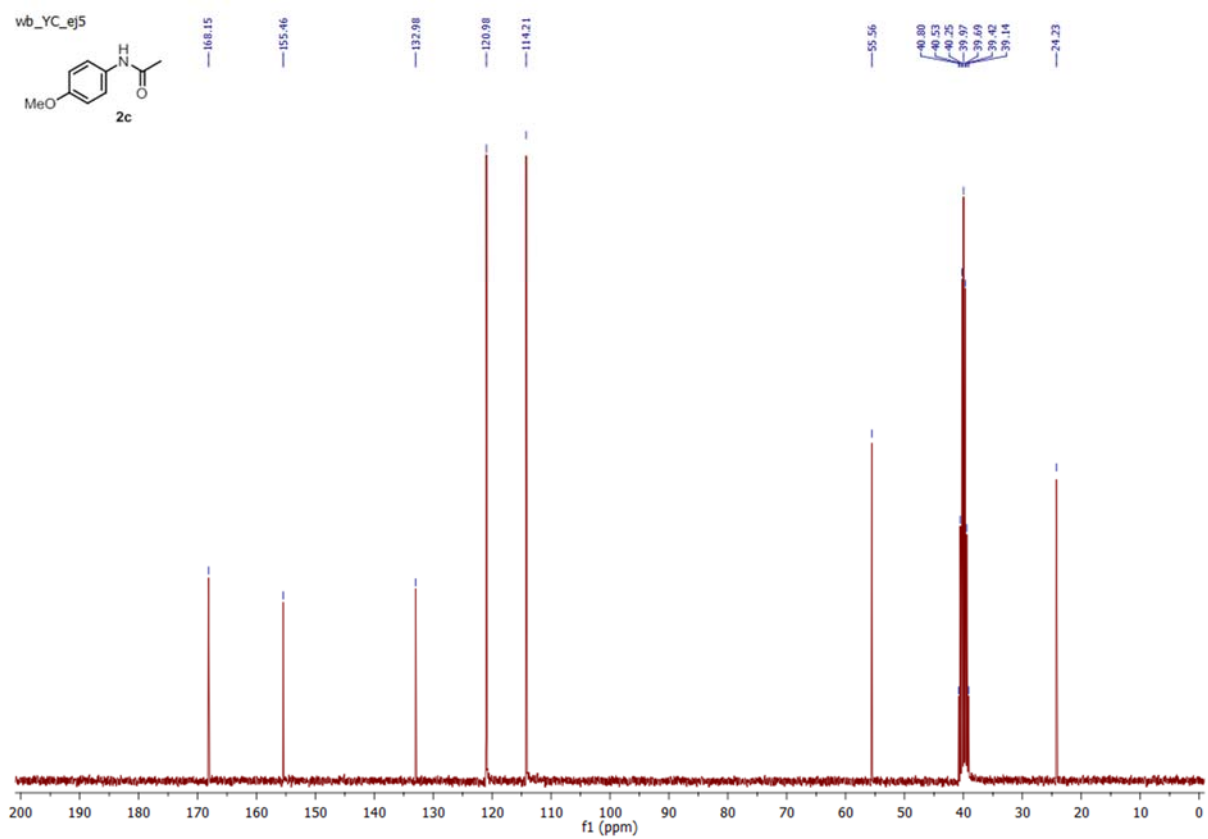

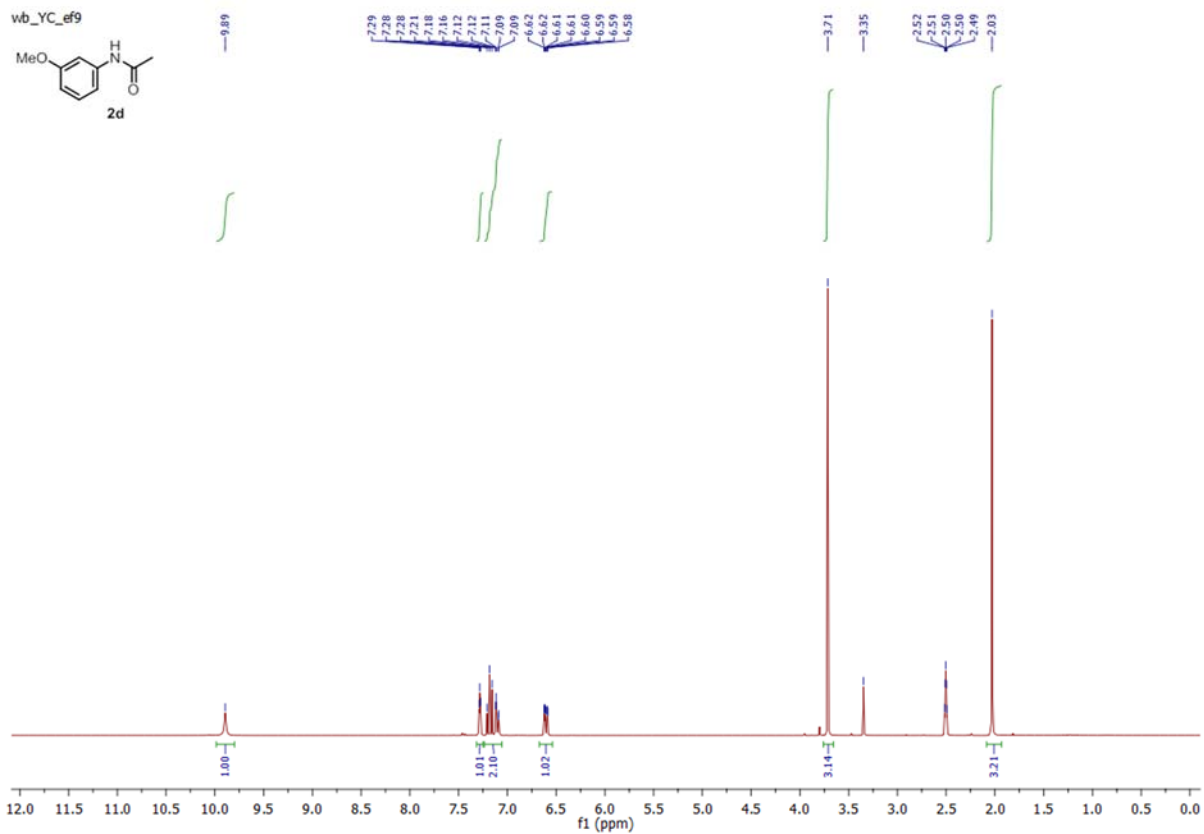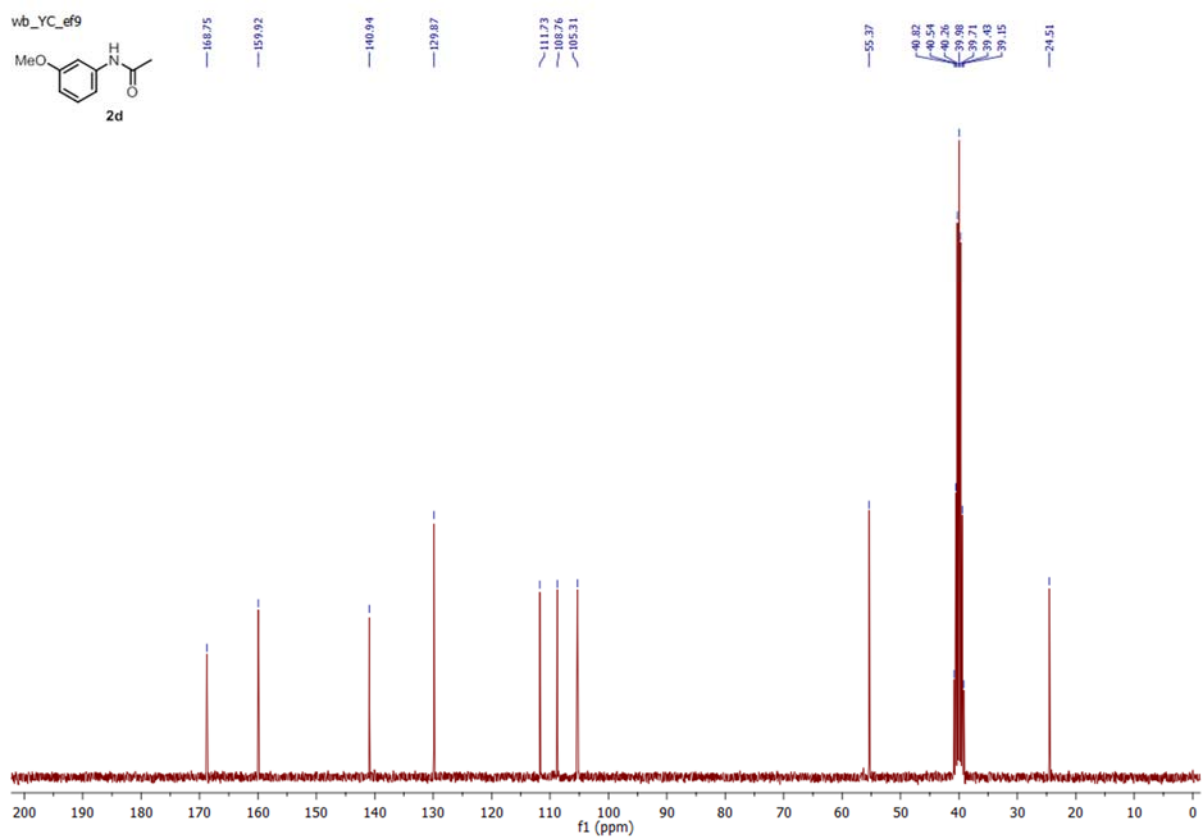

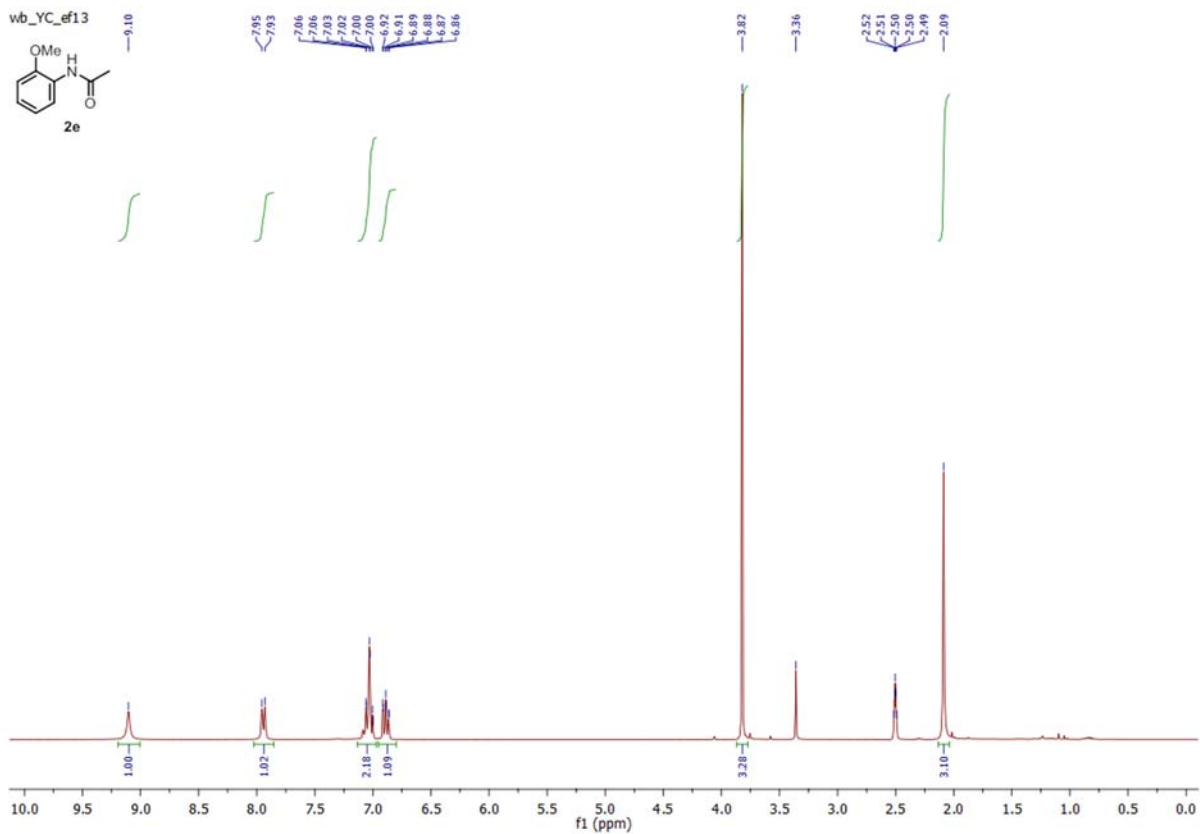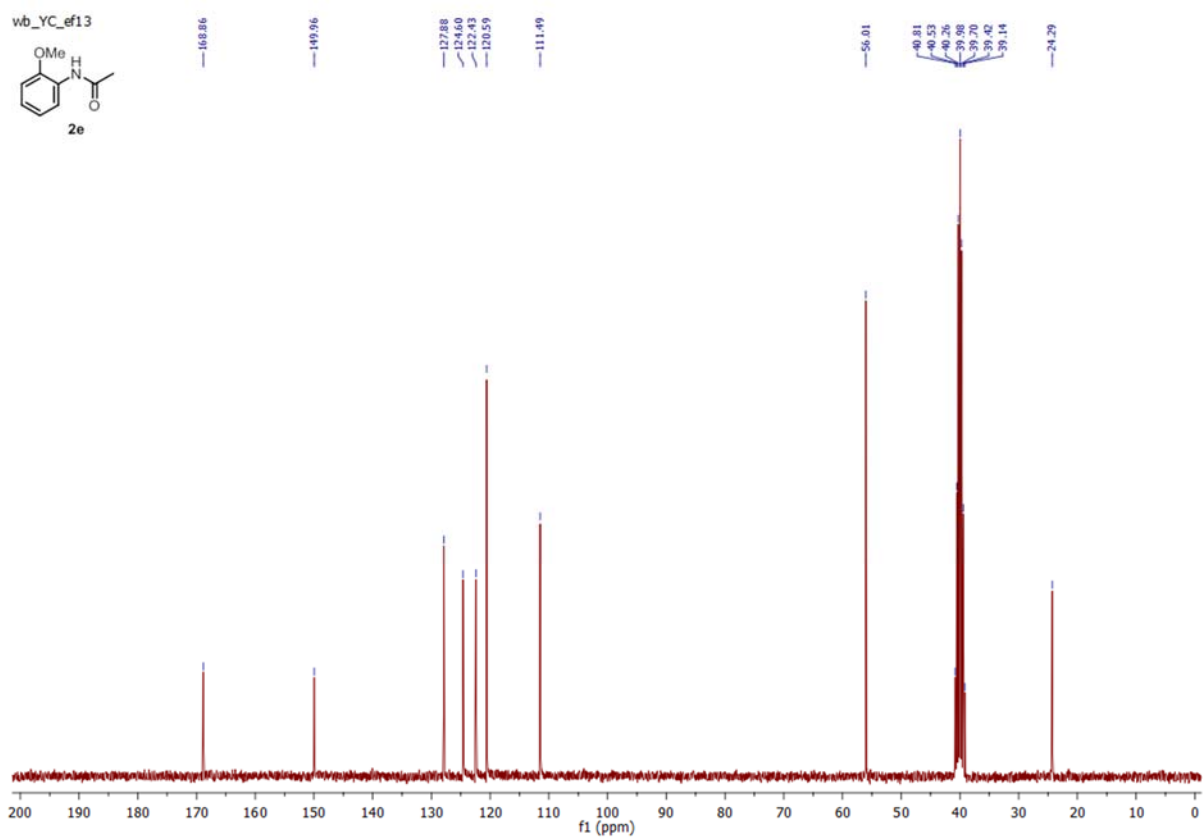

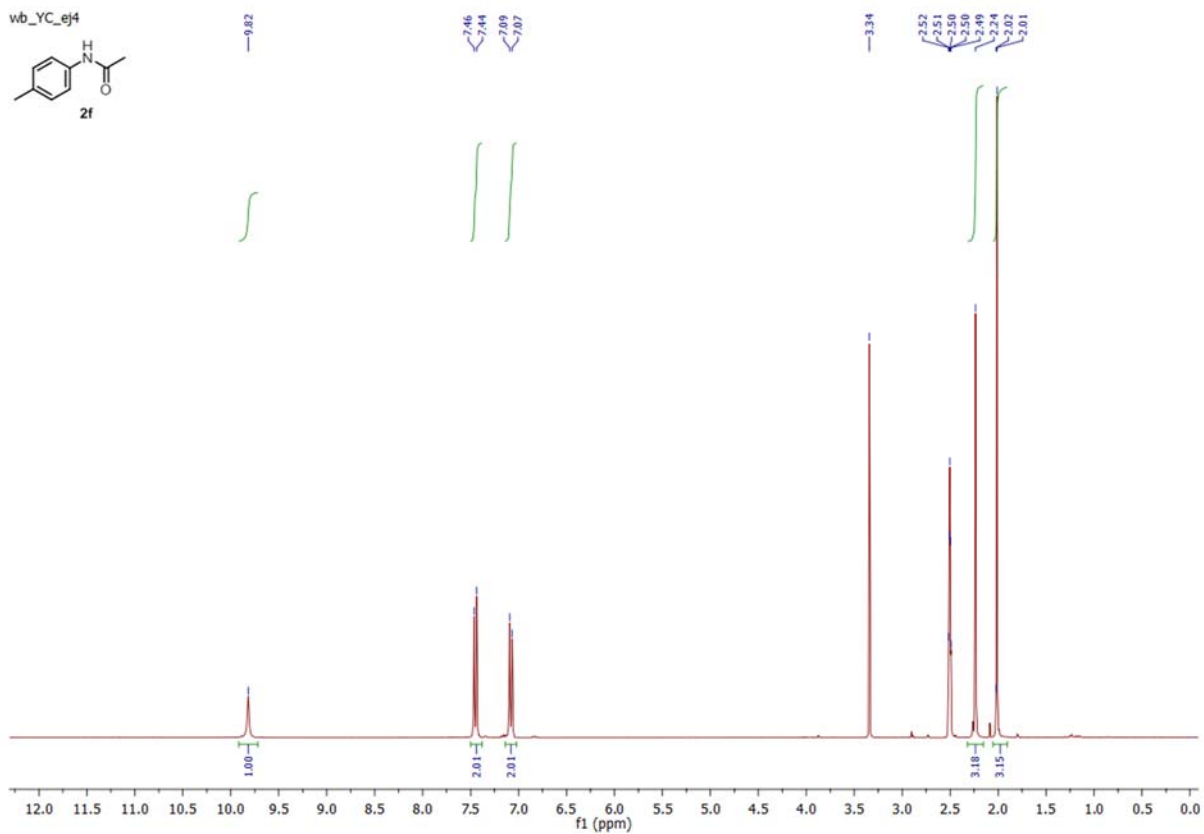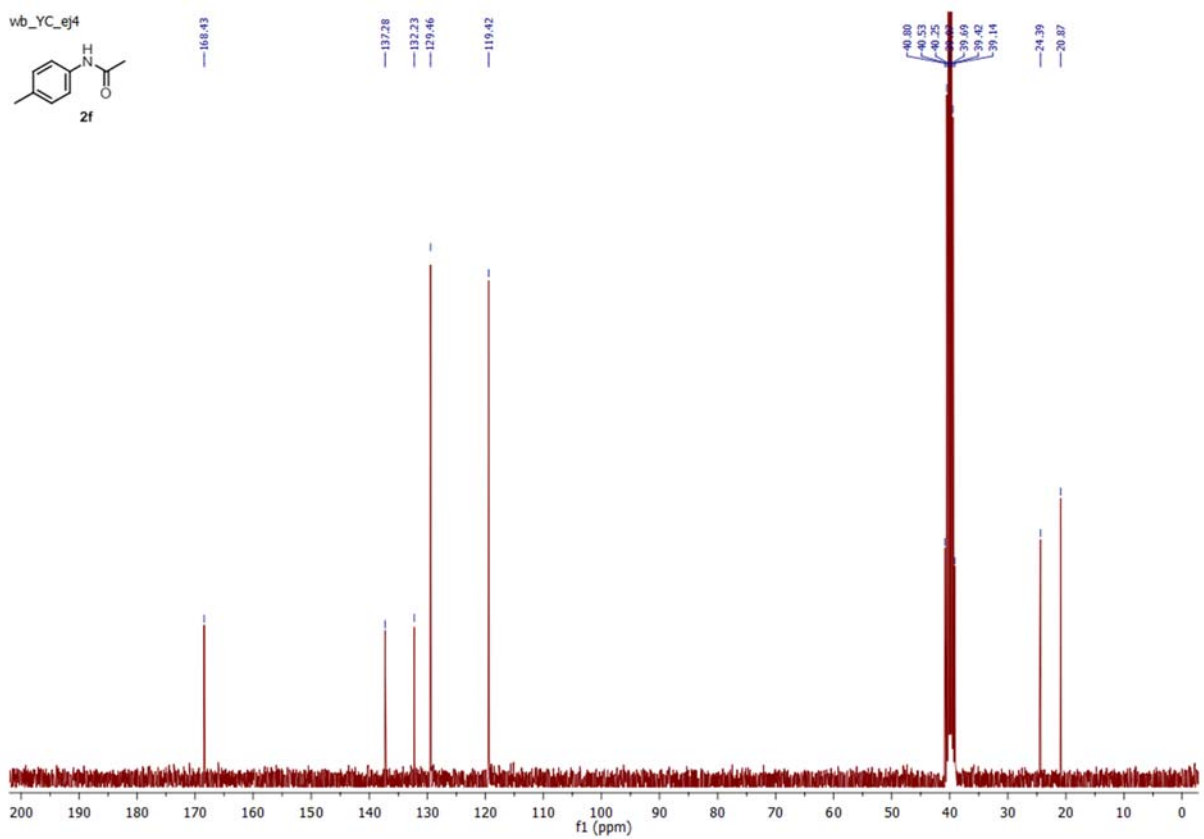

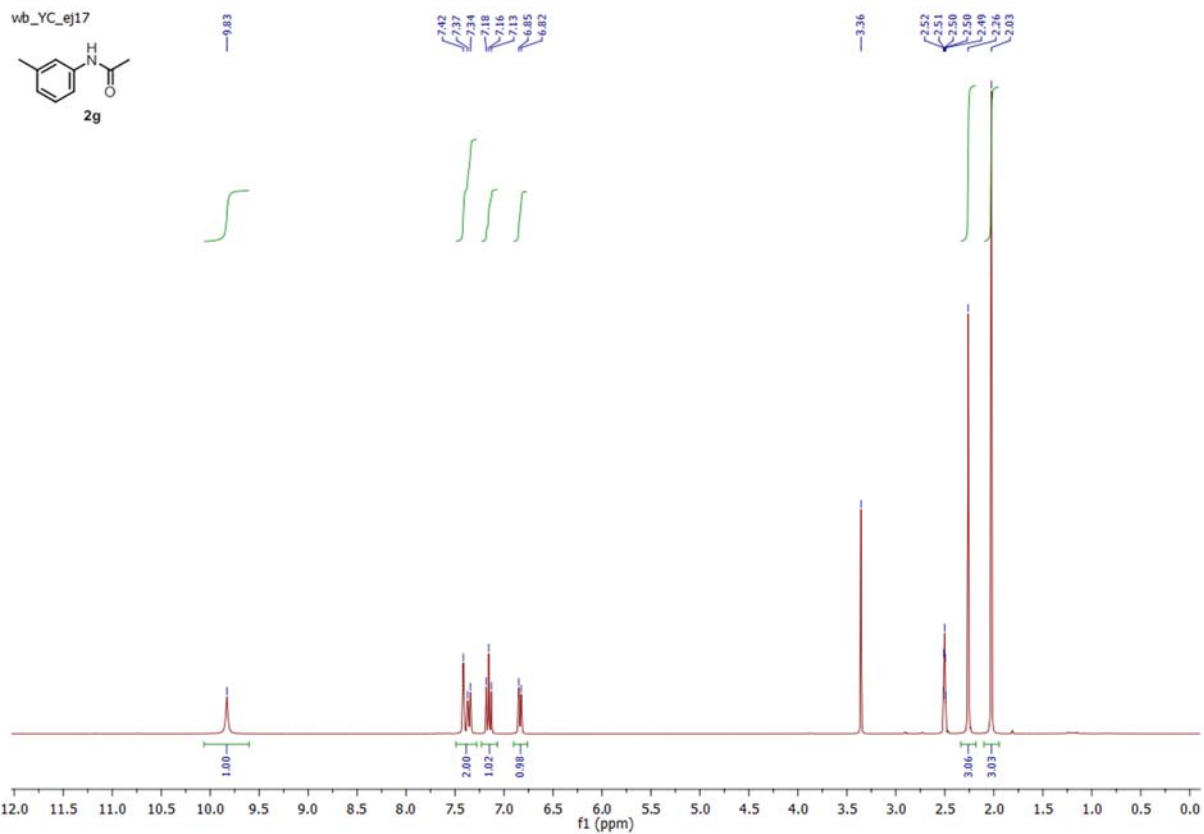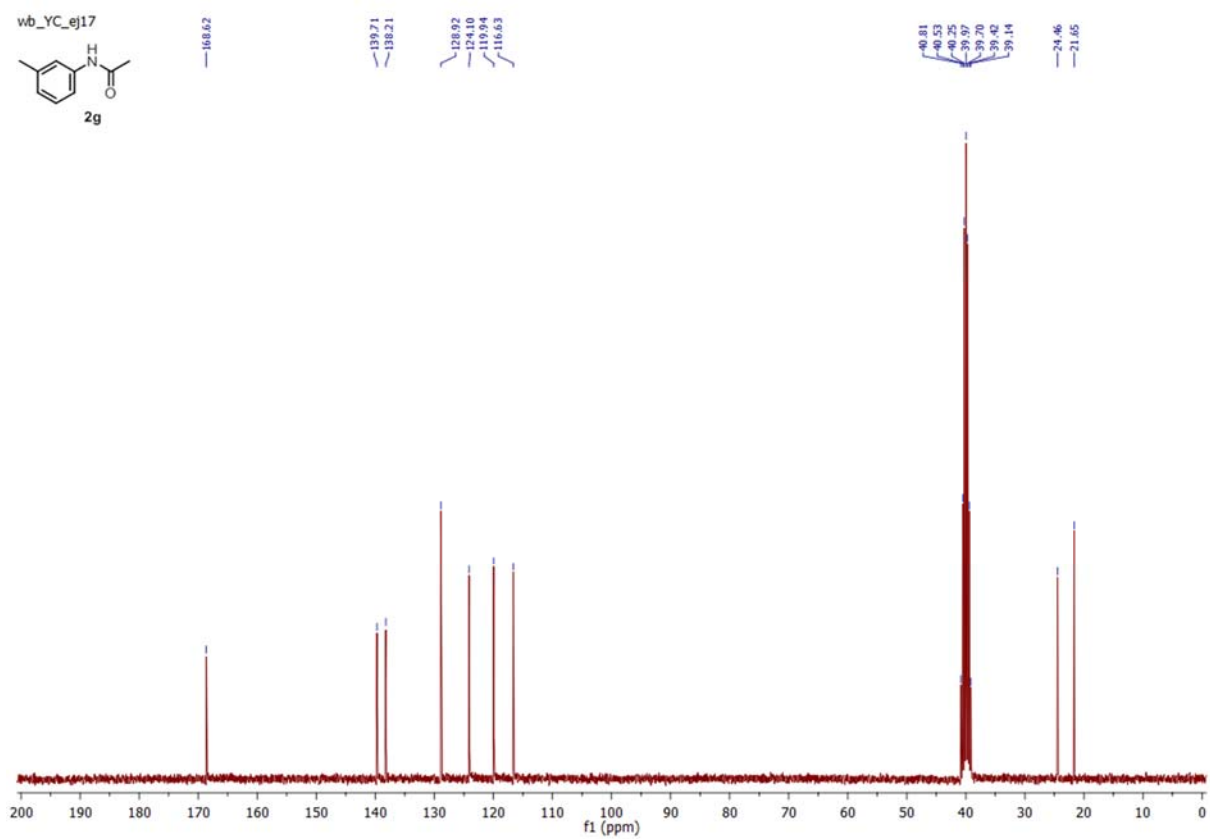

wb\_YC\_ej18

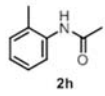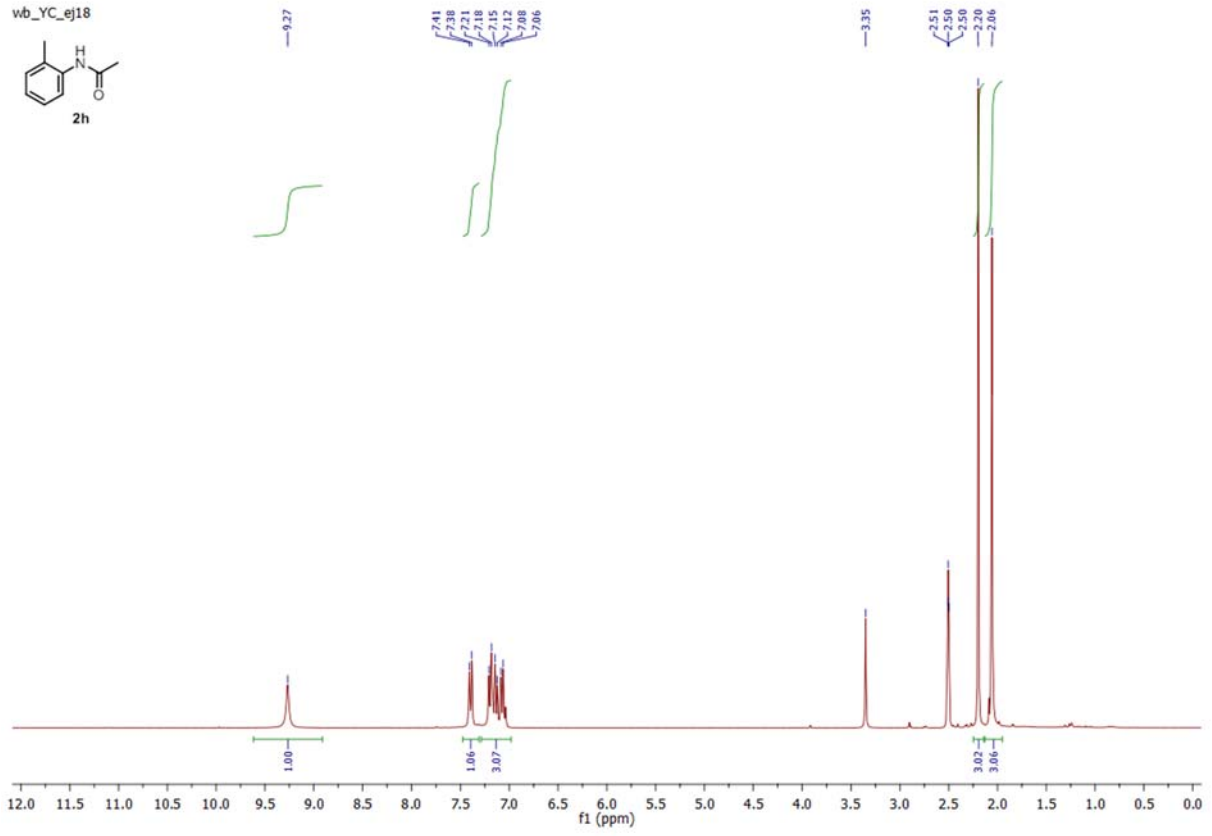

wb\_YC\_ej18

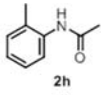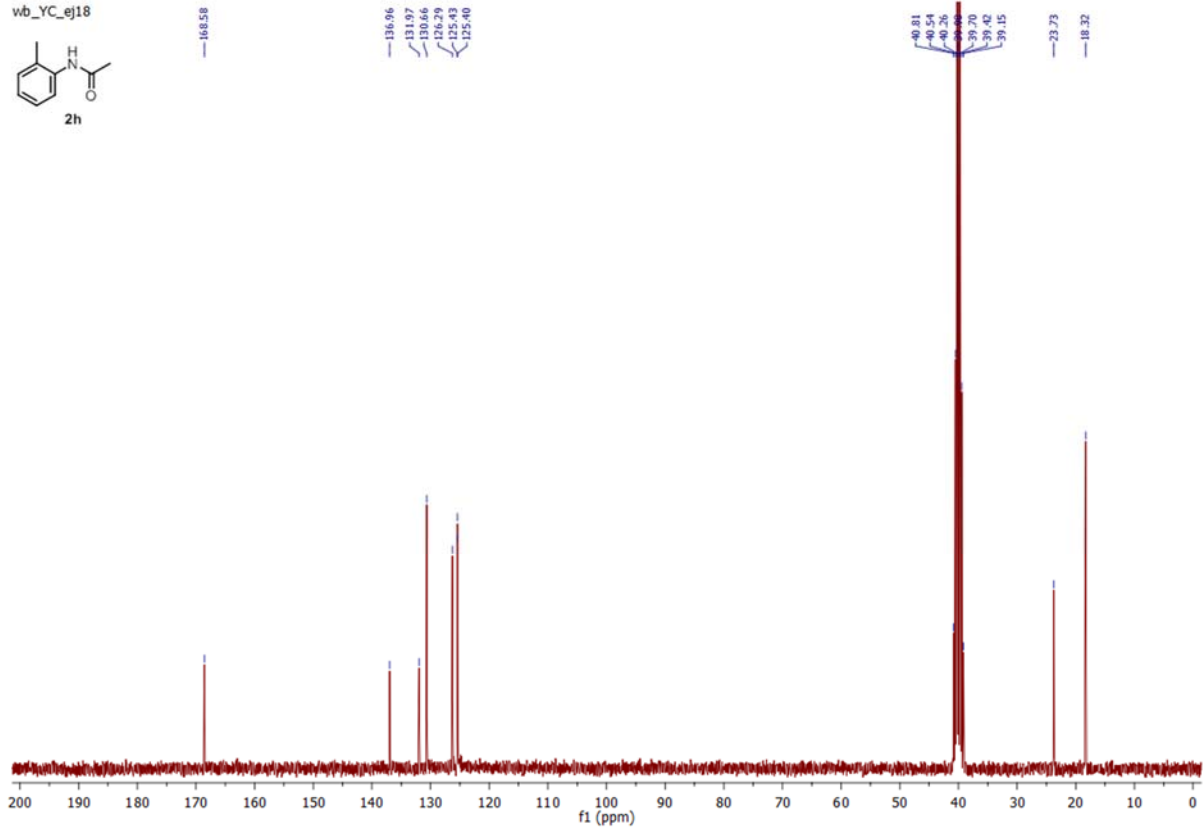



wb\_YC\_ej19

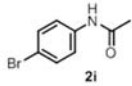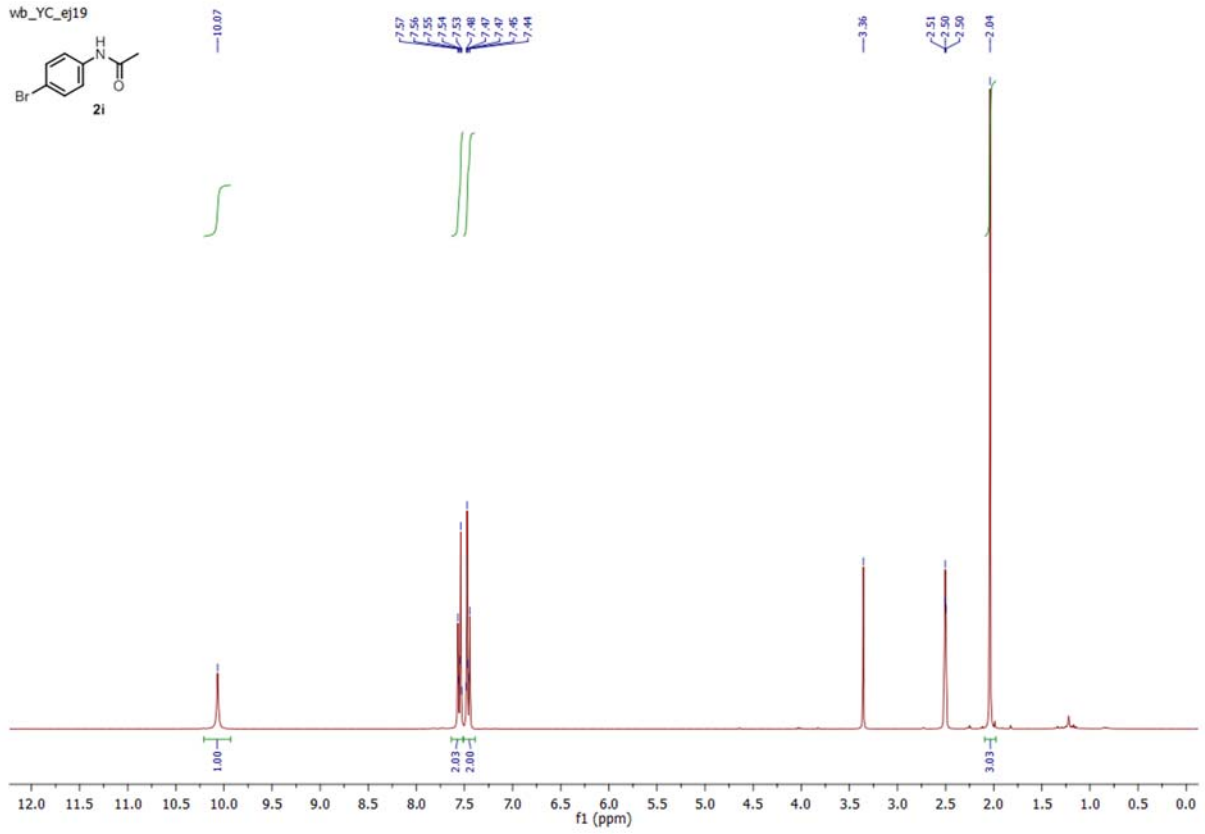

wb\_YC\_ej19

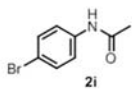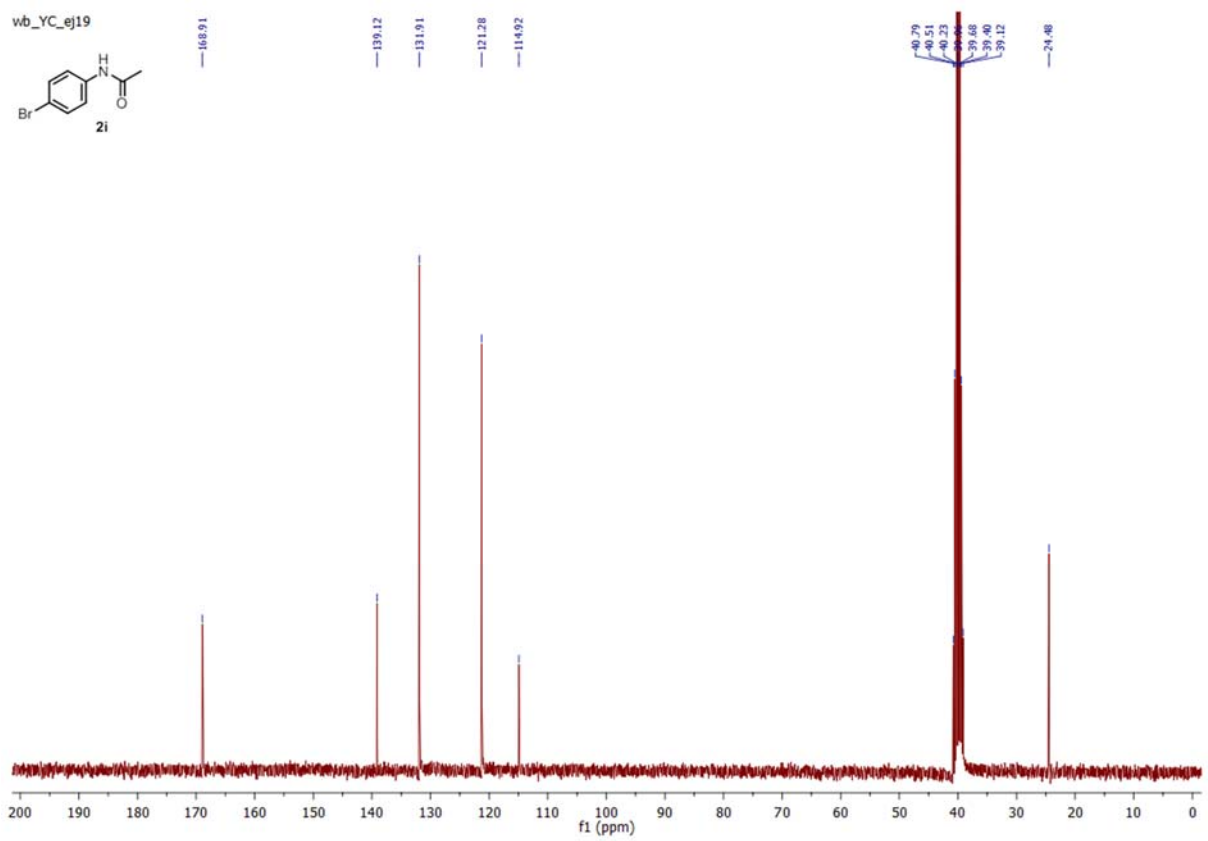

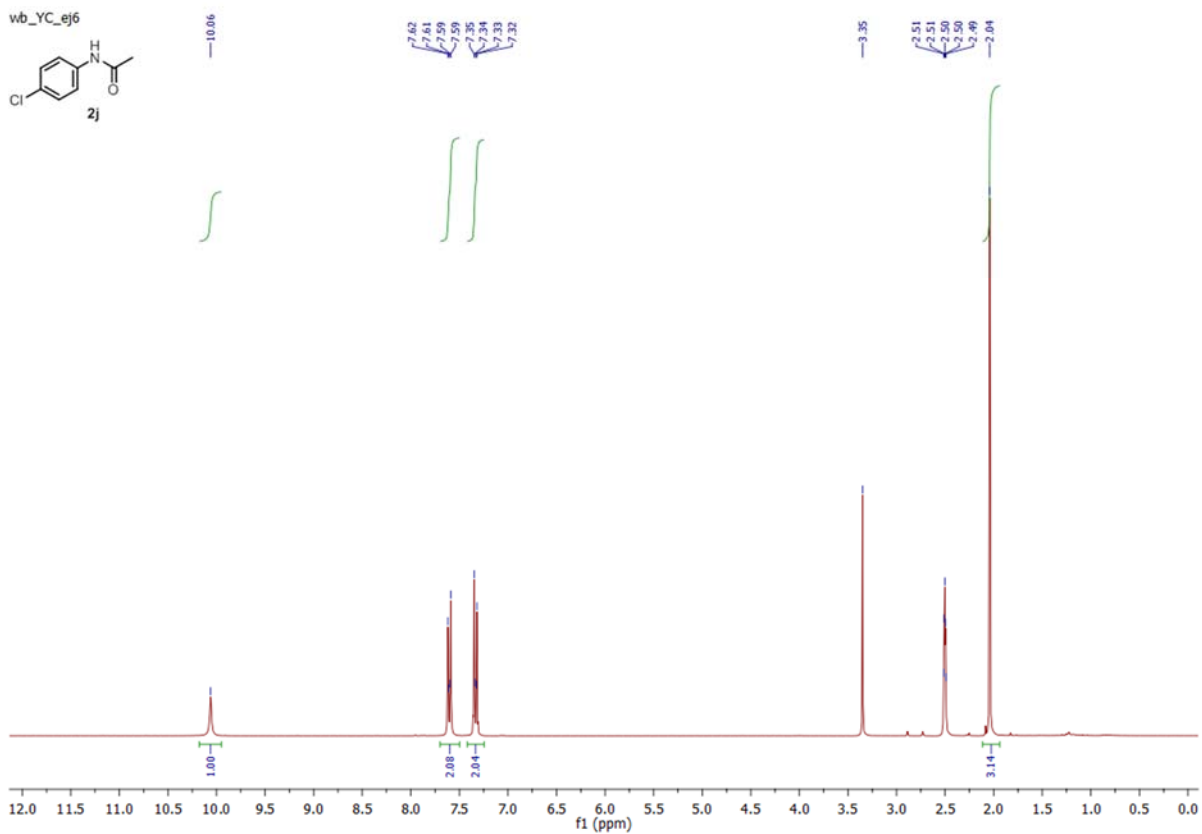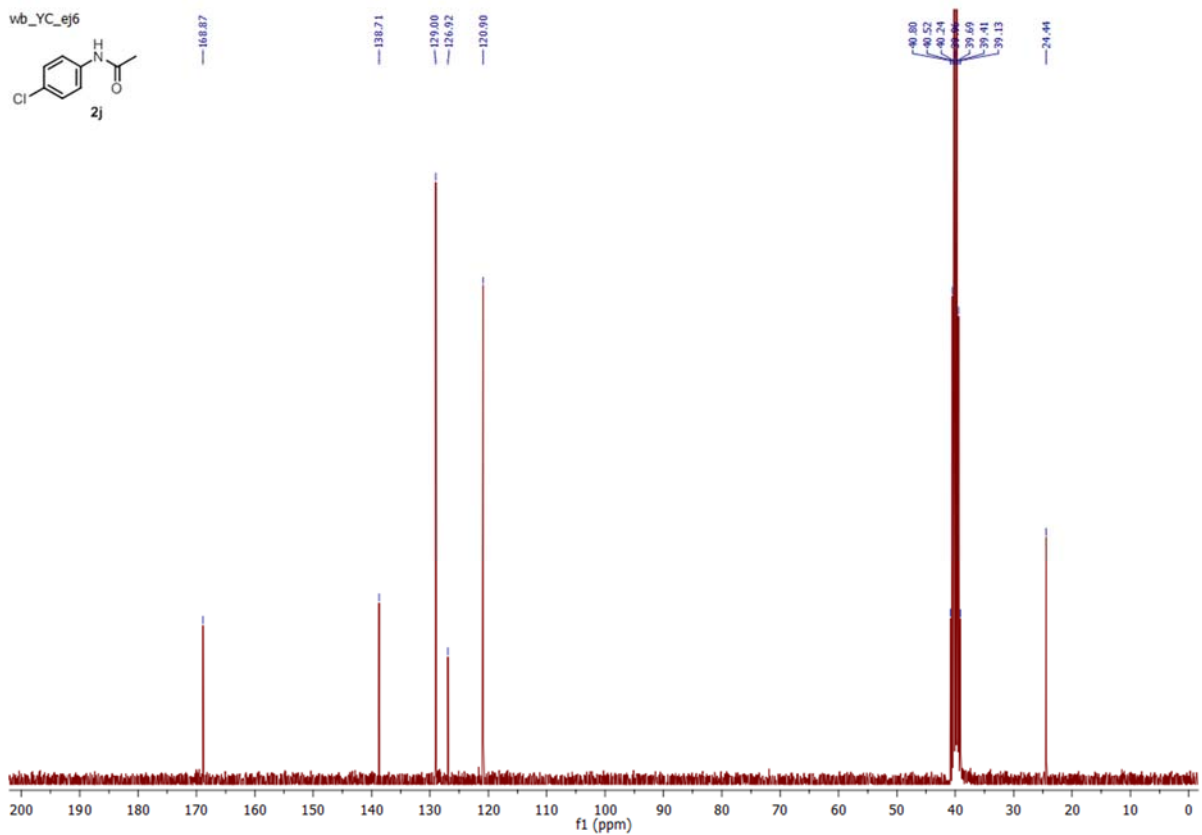

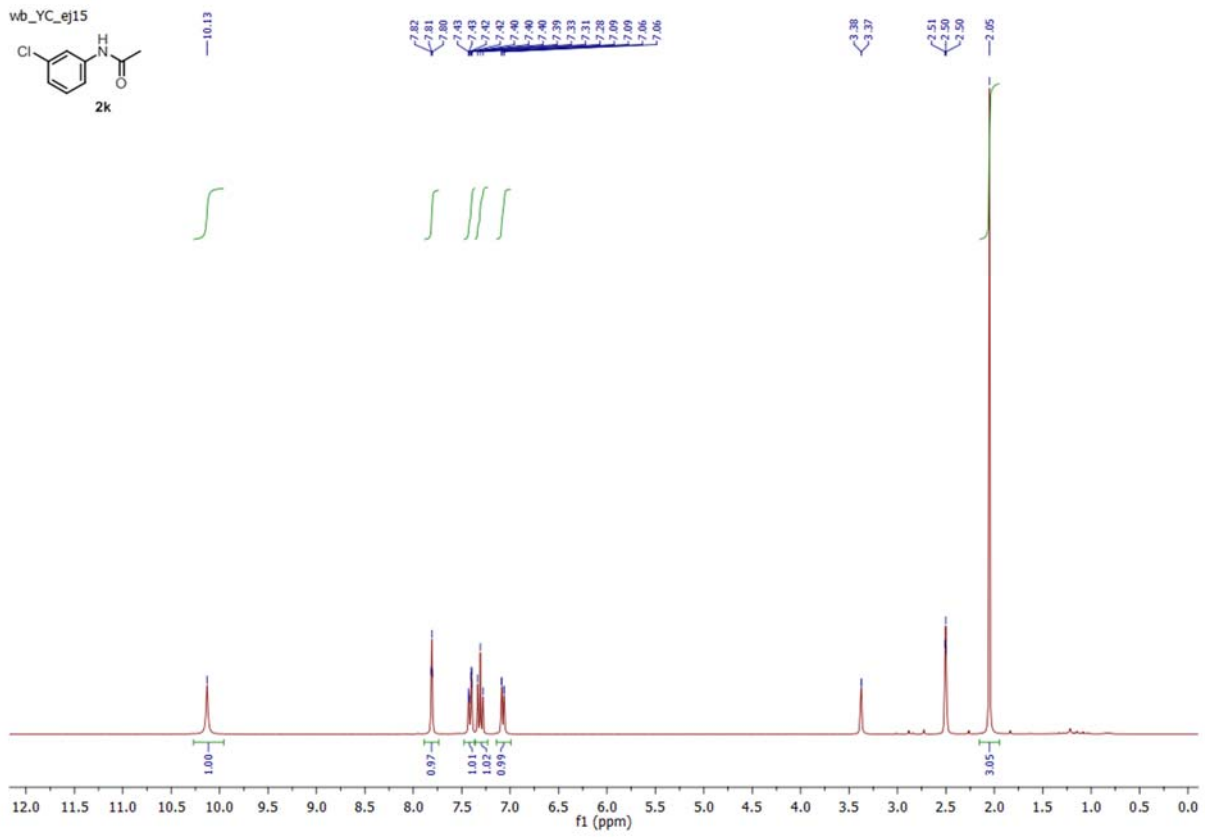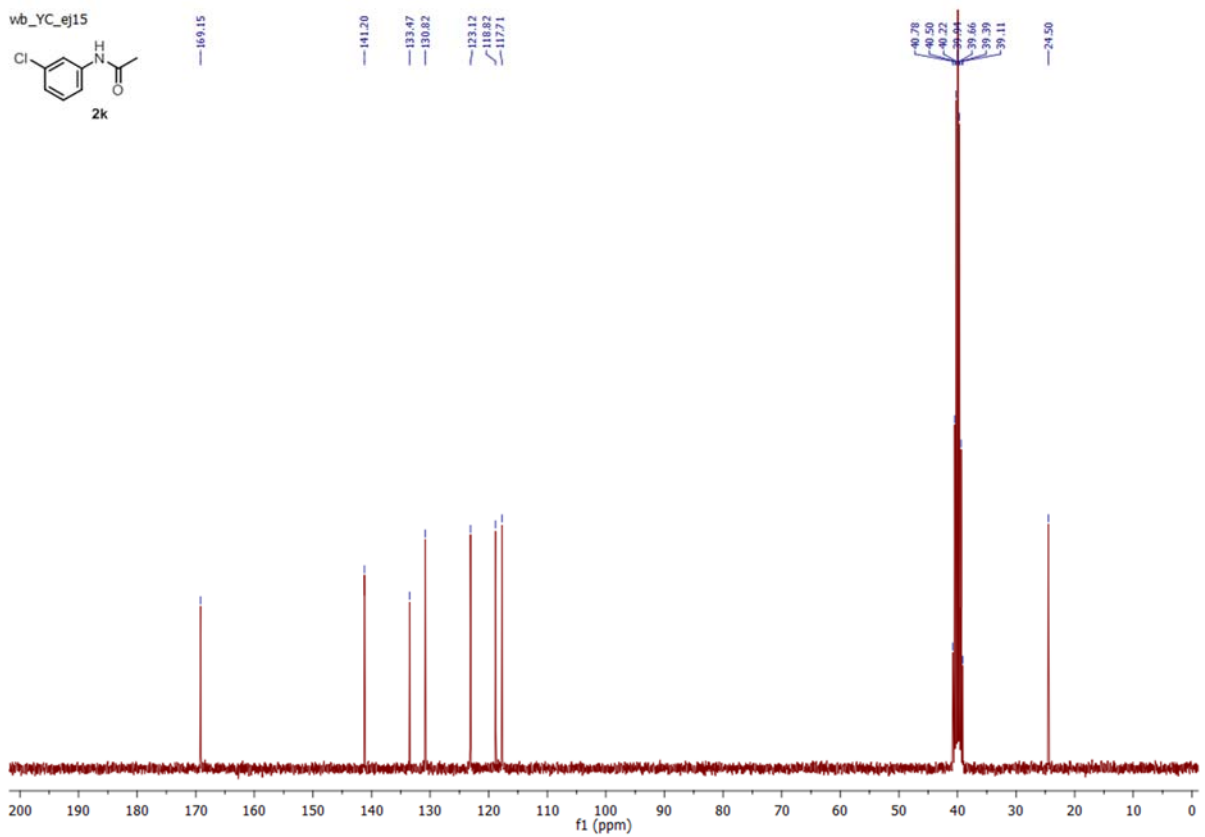

wb\_YC\_ej14

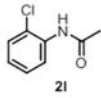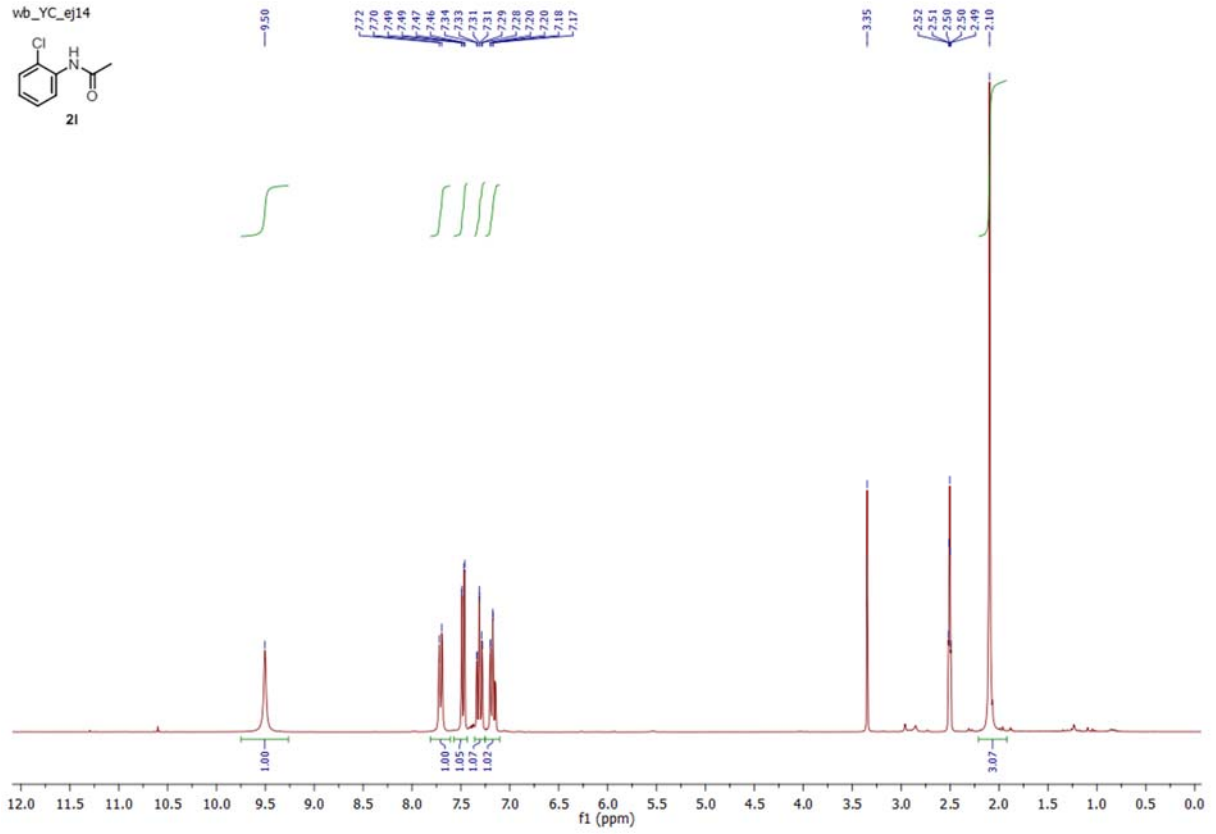

wb\_YC\_ej14

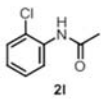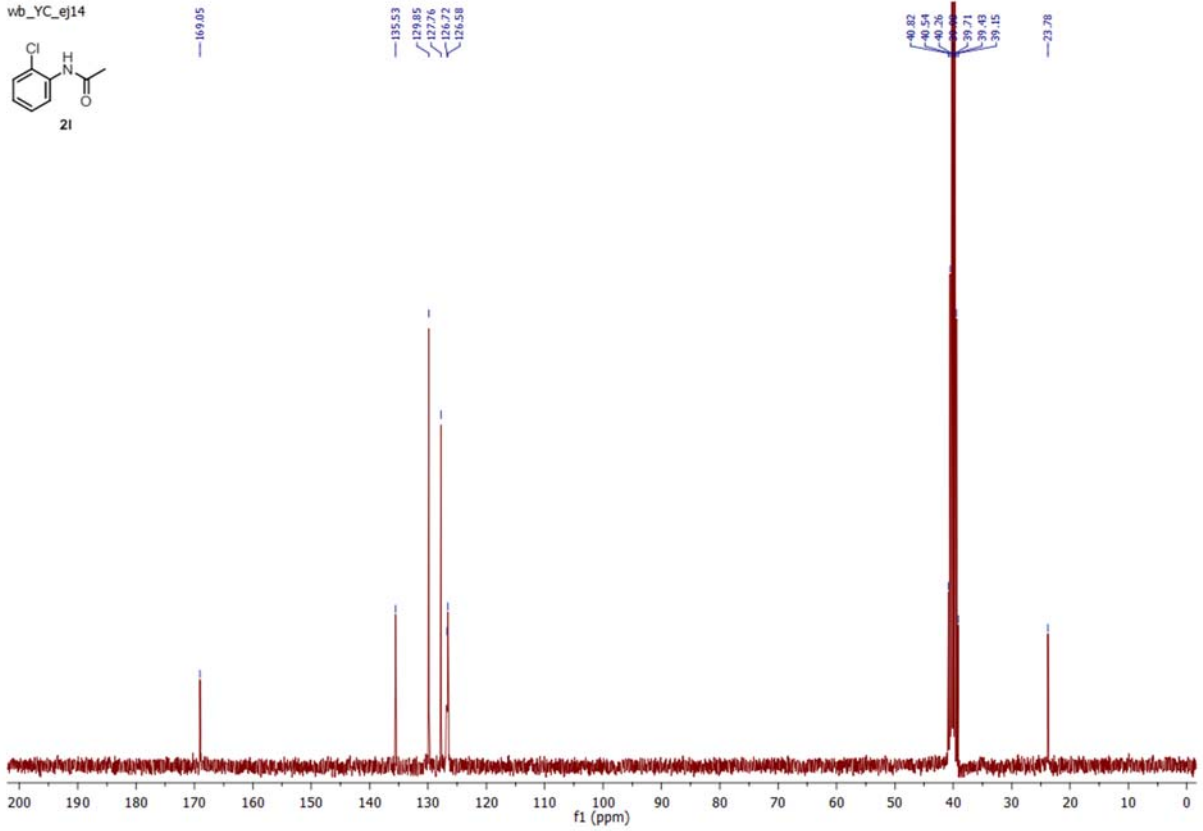

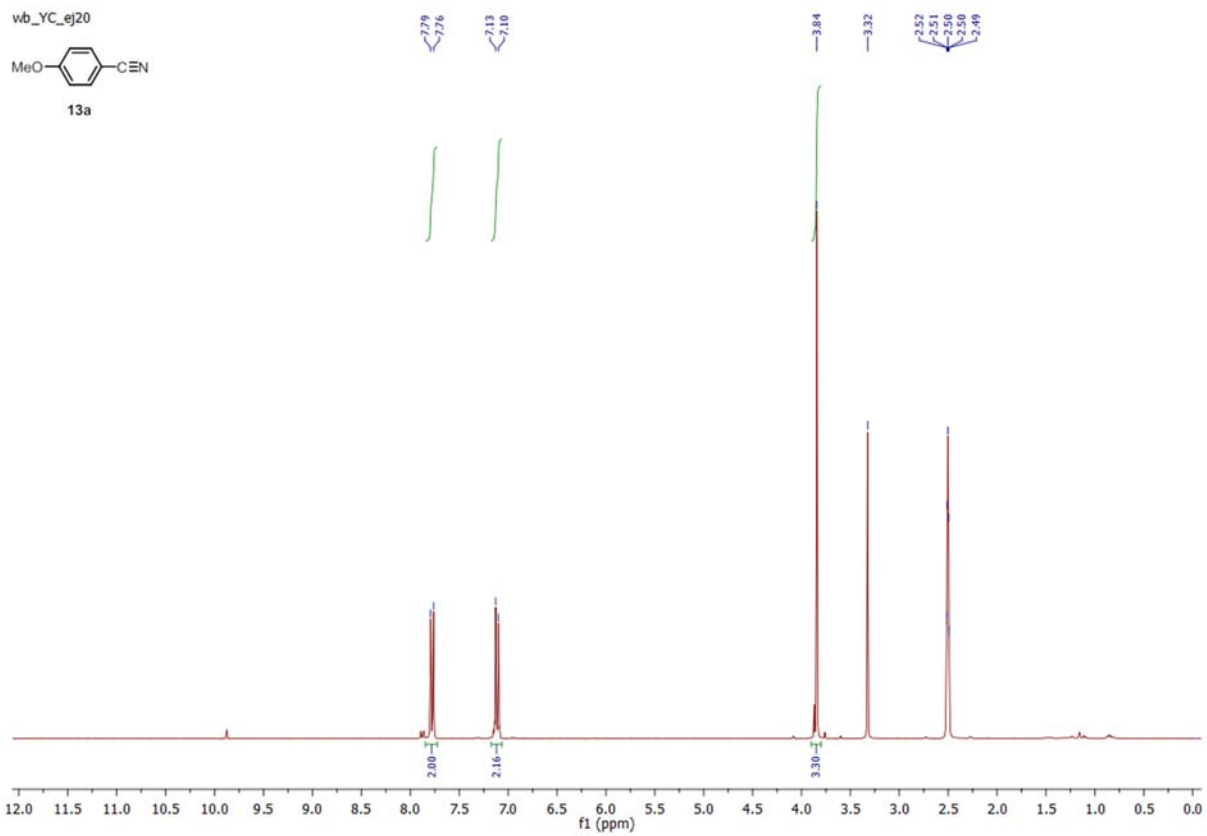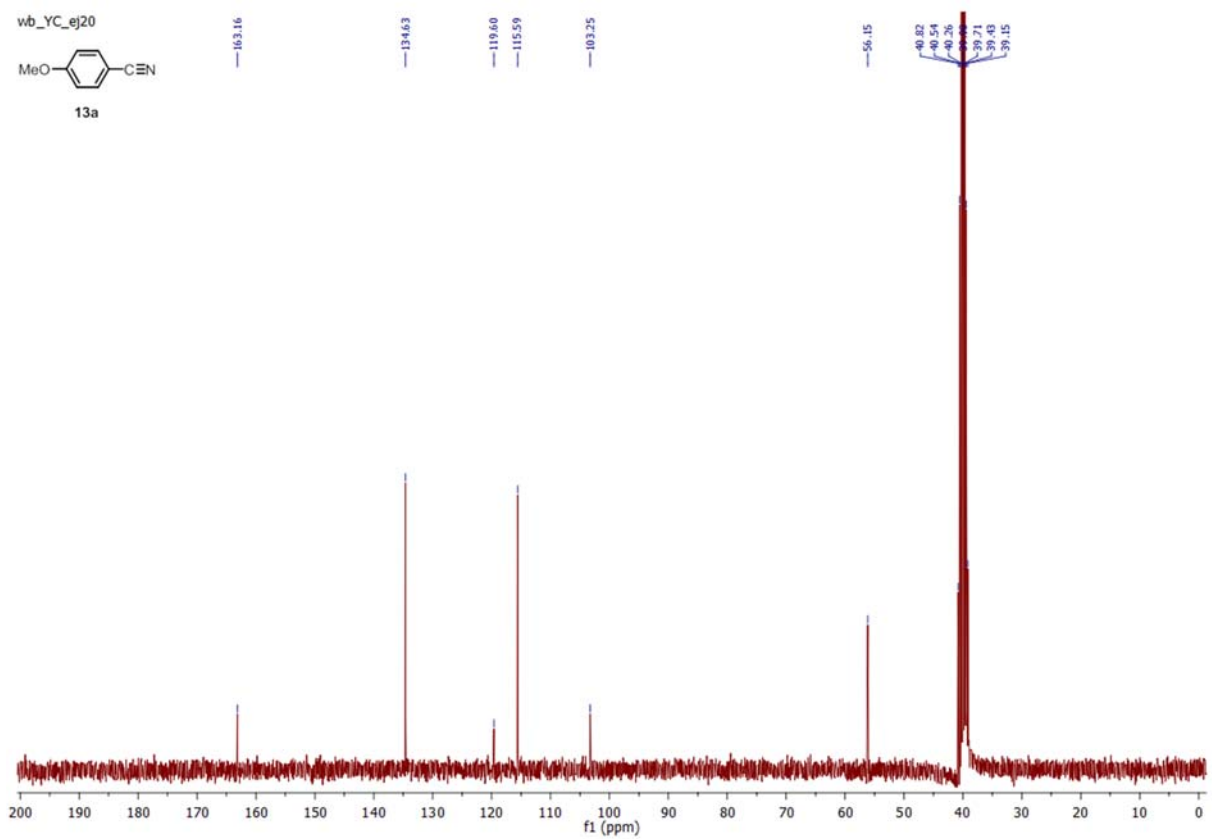

Supplement: EJOC-2019-2163-s001.pdf [file EJOC-2019-2163-s001.pdf]
